# Supplementary material for: Associations of Early Pregnancy Metabolite Profiles with Gestational Blood Pressure Development
Source: MDPI journal article supplement (doi:10.3390/metabo12121169), 2022-11-24
Supplement: s1 [file s1]

# **Supplementary Material**

## **Supplemental Text.** Methods for blood metabolomics analysis.

At enrollment in the study, maternal non-fasting blood samples were obtained at a mean gestational age of 13.0 weeks (standard deviation  $\pm$  1.7 weeks) by research nurses.<sup>1</sup> Blood samples were transported to the regional laboratory (STAR-MDC), spun and stored at -80 °C within 4h after collection. They were transported on dry ice to the Division of Metabolic and Nutritional Medicine of the Dr. von Hauner Children's Hospital in Munich, Germany.

As described in detail previously, a targeted metabolomics approach was used to determine the serum concentrations ( $\mu$ mol/L) of AA, non-esterified fatty acids (NEFA), phospholipids (PL) (including diacyl-phosphatidylcholines (PC.aa), acyl-alkyl-phosphatidylcholines (PC.ae), acyl-lysophosphatidylcholines (Lyso.PC.a), alkyl-lysophosphatidylcholines (Lyso.PC.e), sphingomyelins (SM)) and carnitines (Carn) (including free carnitine (Free Carn) and acyl-carnitines (Carn.a)).<sup>1,2</sup> Proteins of 50  $\mu$ L serum were precipitated by adding 450  $\mu$ L methanol with the following internal standards: labeled amino acid standards set A (NSK-A-1, Cambridge Isotope Laboratories (CIL), USA), 15N2-L-asparagine (NLM-3286-0.25, CIL, USA), indole-D5-L-tryptophan (DLM-1092-0.5, CIL, USA), U-13C16-palmitic acid (CLM-409-MPT-PK, CIL, USA), D3-acetyl-carnitine (DLM-754-PK, CIL, USA), D3-octanoyl-carnitine (DLM-755-0.01, CIL, USA), and D3-palmitoyl-carnitine (DLM-1263-0.01, CIL, USA), tridecanoyl-2-hydroxy-sn-glycero-3-phosphocholine (855476, Avanti Polar Lipids, USA) and 1,2-dimyristoyl-sn-glycero-3-phosphocholine (850345, Avanti Polar Lipids, USA).<sup>1</sup> If sample volume was less than optimal, the concentrations were corrected by the respective factor. Sample volumes less than 25  $\mu$ L were considered missing. After centrifugation, we split the supernatant into aliquots. We analyzed AA by liquid chromatography tandem mass spectrometry (LC-MS/MS), as described previously. An aliquot of the supernatant was used for the derivatization to AA butylester with hydrochloric acid in 1-butanol. After evaporation, the residues were dissolved in water/methanol (80:20; (v/v)) with 0.1% formic acid.<sup>1</sup> The samples were analyzed with 1100 high-performance liquid chromatography (HPLC) system (Agilent, Waldbronn, Germany) equipped with 150 x 2.1 mm, 3.5  $\mu$ m particle size C18 HPLC column (X-Bridge, Waters, Milford, USA) and 0.1% heptafluorobutyric acid as an ion pair reagent in the mobile phases A (water) and B (methanol). We performed mass spectrometry (MS) detection with an API2000 tandem mass spectrometer (MS/MS) (AB Sciex, Darmstadt, Germany). IUPAC-IUB Nomenclature was used for notation of AA. For AA, information on the identification and analysis for each metabolite and class are presented in the table below.

NEFA, PL and Carn were measured with a 1200 SL HPLC system (Agilent, Waldbronn, Germany) coupled to a 4000 QTRAP tandem mass spectrometer (AB Sciex, Darmstadt, Germany).<sup>3,4</sup> NEFA were analyzed by injection of the supernatant to a LC-MS/MS operating in negative electrospray ionization (ESI) mode where they separated by gradient elution on a 100 x 3.0 mm, 1.9  $\mu$ m particle size Pursuit UPS Diphenyl column from Varian (Darmstadt, Germany) using 5 mM ammonium acetate in water as mobile phase A and acetonitrile/isopropanol (80:20, (v/v)) as mobile phase B.<sup>1</sup> NEFA species were quantified using GLC-85 reference standard mixture (Nu-Chek Prep, USA). For NEFA, information on the identification and analysis for each metabolite and class are presented in the table below.

PL were analyzed by flow-injection-analysis with LC-MS/MS coupled with ESI. The system was run in positive ionization mode with 5% water in isopropanol as mobile phase A and 5% water in methanol as mobile phase B. The method included 2 periods of 2.6 minutes each. The total runtime for both periods was 5.2 minutes and 0.8 injection time with a total injection volume of 60  $\mu$ L. The analysis was performed for PC.aa, PC.ae, Lyso.PC.a, Lyso.PC.e and SM. For Carn (Free Carn and Carn.a) analysis we performed flow-injection analysis of the supernatant into a LC-MS/MS system using an isocratic elution with 76% isopropanol, 19% methanol and 5% water.<sup>1</sup> The mass spectrometer was equipped with electrospray ionization and operated in the positive ionization mode. PL and Carn.a were quantified using aliquots of a commercially available lyophilized control plasma (ClinChek®, Recipe, Germany), where the concentrations have been determined by AbsoluteIDQ p150 Kit from Biocrates®, a previously published LC-MS/MS method and by in-house quantification with various standards. Information on the identification and analysis of PL and Carn.a are given in the table below.<sup>1</sup> The entire analytical process was controlled and post-processed by Analyst 1.6.1. and R Software.<sup>2</sup> The analytical technique used can determine the total number of total bonds, but not the position of the double bonds and the distribution of the carbon atoms between FA side chains. The following notation was used for NEFA, PL and

Carn.a: X:Y, where X denotes the length of the carbon chain, and Y the number of double bonds. The ‘a’ denotes an acyl chain bound to the backbone of an ester bond (‘acyl-’) and the ‘e’ represents an ether bond (‘alkyl-’).

Data quality control (QC) was based on thresholds of 25% and 35% for the intra- and inter-batch coefficients of variation respectively.<sup>1</sup> To correct for batch effects, metabolite concentrations were divided by the ratio of the intra-batch and inter-batch median of the QC samples. Metabolites and participants with more than 50% of missing values were excluded. Missing metabolite values of the remaining metabolites and participants were imputed using the Random Forest algorithm (R package missForest), which is among the best performing imputation methods for mass-spectrometry based metabolomics data with missing values at random or missing values completely at random. The Random Forest algorithm works by aggregating the predictions made by multiple decision trees of varying depth. The trees (or models) are relatively uncorrelated, as each tree samples at random from the dataset and the trees use different features to make the decision instead of always picking the feature that provides the most separation.

For analyses, we categorized metabolites into general metabolite groups based on chemical structure (AA, NEFA, PC.aa, PC.ae, Lyso.PC.a, Lyso.PC.e, SM, Free Carn and Carn.a) and in detailed metabolite subgroups based on chemical structure and biological relevance (AA: branched chain AA (BCAA), aromatic AA (AAA), essential AA, non-essential AA; NEFA, PC.aa, PC.ae, Lyso.PC.a, Lyso.PC.e and SM: saturated, mono-unsaturated, poly-unsaturated; Carn.a: short-chain, medium-chain, long-chain).<sup>1</sup> Correlations between metabolites were assessed in a previous study, concluding high correlations between individual metabolites within groups of metabolites with similar chemical structures, but lower correlations between groups of metabolites with different chemical structures (Voerman et al. 2020). To correct for right skewedness, individual metabolite concentrations were square root transformed. To facilitate interpretation of the effect estimates, standard deviation scores (SDS) were calculated for both metabolite groups and individual metabolites.

Table S1: Parameters for mass-spectrometry detection and identifications

| Parameters for mass-spectrometry detection and identification for amino-acids and non-esterified fatty acids, including the labelled internal standards . |            |         |       |    |    |     |        |              |
|-----------------------------------------------------------------------------------------------------------------------------------------------------------|------------|---------|-------|----|----|-----|--------|--------------|
| ID*                                                                                                                                                       | Rt minutes | Q1      | Q3    | DP | CE | CXP | Adduct | MSI ID Level |
| <b>Amino acids</b>                                                                                                                                        |            |         |       |    |    |     |        |              |
| Ala1                                                                                                                                                      | 7,6        | 146,182 | 44    | 11 | 25 | 4   | (M+H)+ | 1            |
| Ala2                                                                                                                                                      | 7,6        | 146,182 | 90    | 11 | 13 | 12  | (M+H)+ | 1            |
| AlaIS                                                                                                                                                     | 7,6        | 150,168 | 48,1  | 31 | 25 | 6   | (M+H)+ | 1            |
| Arg1                                                                                                                                                      | 7,3        | 231,201 | 70,1  | 21 | 39 | 8   | (M+H)+ | 1            |
| Arg2                                                                                                                                                      | 7,3        | 231,276 | 60    | 21 | 33 | 8   | (M+H)+ | 1            |
| Arg3                                                                                                                                                      | 7,3        | 231,276 | 172,2 | 21 | 21 | 8   | (M+H)+ | 1            |
| ArgIS                                                                                                                                                     | 7,3        | 236,201 | 75,1  | 21 | 39 | 8   | (M+H)+ | 1            |
| Asn1                                                                                                                                                      | 5,4        | 189,303 | 144,1 | 21 | 17 | 6   | (M+H)+ | 1            |
| Asn2                                                                                                                                                      | 5,4        | 189,303 | 74    | 21 | 27 | 8   | (M+H)+ | 1            |
| Asn3                                                                                                                                                      | 5,4        | 189,303 | 130,3 | 21 | 19 | 4   | (M+H)+ | 1            |
| AsnIS                                                                                                                                                     | 5,4        | 191,116 | 145,2 | 21 | 19 | 6   | (M+H)+ | 1            |
| Asp1                                                                                                                                                      | 13,8       | 246,262 | 144,3 | 21 | 19 | 6   | (M+H)+ | 1            |
| Asp2                                                                                                                                                      | 13,8       | 246,262 | 88,1  | 21 | 27 | 2   | (M+H)+ | 1            |
| Asp3                                                                                                                                                      | 13,8       | 246,262 | 74,2  | 21 | 35 | 8   | (M+H)+ | 1            |
| AspIS                                                                                                                                                     | 13,8       | 249,278 | 147,3 | 16 | 19 | 6   | (M+H)+ | 1            |
| Cit1                                                                                                                                                      | 6,3        | 232,249 | 70,1  | 16 | 43 | 8   | (M+H)+ | 1            |
| Cit2                                                                                                                                                      | 6,3        | 232,249 | 215,3 | 16 | 17 | 10  | (M+H)+ | 1            |
| Cit3                                                                                                                                                      | 6,3        | 232,249 | 113,2 | 16 | 27 | 4   | (M+H)+ | 1            |
| CitIS                                                                                                                                                     | 6,3        | 234,237 | 115,2 | 16 | 27 | 4   | (M+H)+ | 1            |

|       |      |         |       |    |    |    |        |   |
|-------|------|---------|-------|----|----|----|--------|---|
| Cys1  | 11,8 | 353,133 | 129,9 | 21 | 29 | 14 | (M+H)+ | 1 |
| Cys2  | 11,8 | 353,078 | 73,9  | 21 | 47 | 8  | (M+H)+ | 1 |
| Cys3  | 11,8 | 353,078 | 208,1 | 21 | 21 | 8  | (M+H)+ | 1 |
| CysIS | 11,8 | 357,133 | 129,9 | 21 | 29 | 14 | (M+H)+ | 1 |
| Gln1  | 5,6  | 203,1   | 84,1  | 11 | 30 | 11 | (M+H)+ | 1 |
| Gln2  | 5,6  | 203,1   | 186,1 | 11 | 16 | 8  | (M+H)+ | 1 |
| Gln3  | 5,6  | 203,1   | 130,1 | 11 | 21 | 15 | (M+H)+ | 1 |
| GlnIS | 5,6  | 208,1   | 89,1  | 11 | 30 | 11 | (M+H)+ | 1 |
| Glu1  | 14,3 | 260,312 | 84    | 16 | 37 | 10 | (M+H)+ | 1 |
| Glu2  | 14,3 | 260,312 | 186,2 | 16 | 19 | 8  | (M+H)+ | 1 |
| Glu3  | 14,3 | 260,312 | 130,1 | 16 | 25 | 4  | (M+H)+ | 1 |
| GluIS | 14,3 | 263,297 | 87,1  | 16 | 35 | 10 | (M+H)+ | 1 |
| Gly1  | 6,2  | 132,19  | 76    | 16 | 13 | 8  | (M+H)+ | 1 |
| Gly2  | 6,2  | 132,19  | 57    | 16 | 19 | 6  | (M+H)+ | 1 |
| GlyIS | 6,2  | 134,17  | 77,9  | 16 | 13 | 10 | (M+H)+ | 1 |
| His1  | 6,8  | 212,18  | 109,9 | 16 | 27 | 14 | (M+H)+ | 1 |
| His2  | 6,8  | 212,271 | 83,1  | 21 | 41 | 10 | (M+H)+ | 1 |
| His3  | 6,8  | 212,271 | 93    | 21 | 41 | 8  | (M+H)+ | 1 |
| HisIS | 6,8  | 215,184 | 112,9 | 16 | 27 | 14 | (M+H)+ | 1 |
| Ile1  | 12,4 | 188,327 | 86    | 21 | 21 | 10 | (M+H)+ | 1 |
| Ile2  | 12,4 | 188,327 | 69    | 21 | 33 | 8  | (M+H)+ | 1 |
| Ile3  | 12,4 | 188,327 | 44,1  | 21 | 43 | 4  | (M+H)+ | 1 |
| Leu1  | 12,6 | 188,2   | 86    | 21 | 21 | 10 | (M+H)+ | 1 |
| Leu2  | 12,6 | 188,2   | 69    | 21 | 33 | 8  | (M+H)+ | 1 |
| Leu3  | 12,6 | 188,2   | 44,1  | 21 | 43 | 4  | (M+H)+ | 1 |
| LeuIS | 12,6 | 191,338 | 89,2  | 11 | 19 | 2  | (M+H)+ | 1 |
| Lys1  | 7,2  | 203,2   | 84,1  | 21 | 33 | 2  | (M+H)+ | 1 |
| Lys2  | 7,2  | 203,2   | 186,2 | 21 | 17 | 8  | (M+H)+ | 1 |
| Lys3  | 7,2  | 203,2   | 56    | 21 | 61 | 6  | (M+H)+ | 1 |
| LysIS | 7,2  | 207,2   | 88,1  | 21 | 33 | 2  | (M+H)+ | 1 |
| Met1  | 10,9 | 206,245 | 104,1 | 31 | 19 | 4  | (M+H)+ | 1 |
| Met2  | 10,9 | 206,245 | 61,1  | 31 | 41 | 6  | (M+H)+ | 1 |
| Met3  | 10,9 | 206,245 | 56    | 31 | 31 | 6  | (M+H)+ | 1 |
| MetIS | 10,9 | 209,2   | 107,1 | 11 | 30 | 5  | (M+H)+ | 1 |
| Orn1  | 6,7  | 189,304 | 70,1  | 16 | 29 | 8  | (M+H)+ | 1 |
| Orn2  | 6,7  | 189,304 | 172,2 | 16 | 15 | 8  | (M+H)+ | 1 |
| Orn3  | 6,7  | 189,304 | 116,1 | 16 | 21 | 6  | (M+H)+ | 1 |
| OrnIS | 6,7  | 191,338 | 174,1 | 11 | 15 | 8  | (M+H)+ | 1 |
| Phe1  | 12,8 | 222,248 | 120,3 | 21 | 23 | 4  | (M+H)+ | 1 |
| Phe2  | 12,8 | 222,248 | 103,1 | 21 | 49 | 10 | (M+H)+ | 1 |
| Phe3  | 12,8 | 222,248 | 77    | 21 | 69 | 8  | (M+H)+ | 1 |
| PheIS | 12,8 | 228,284 | 126,2 | 16 | 21 | 6  | (M+H)+ | 1 |
| Pro1  | 7,8  | 172,291 | 70,1  | 26 | 25 | 8  | (M+H)+ | 1 |
| Pro2  | 7,8  | 172,291 | 116,2 | 26 | 19 | 4  | (M+H)+ | 1 |
| Pro3  | 7,8  | 172,291 | 57,1  | 26 | 27 | 6  | (M+H)+ | 1 |
| ProIS | 7,8  | 175,18  | 73    | 16 | 27 | 8  | (M+H)+ | 1 |

|                                   |       |         |         |      |     |     |        |   |
|-----------------------------------|-------|---------|---------|------|-----|-----|--------|---|
| Pro2IS                            | 7,8   | 175,18  | 118,9   | 16   | 21  | 16  | (M+H)+ | 1 |
| Ser1                              | 6     | 162,255 | 60      | 16   | 23  | 6   | (M+H)+ | 1 |
| Ser2                              | 6     | 162,255 | 106,2   | 16   | 15  | 4   | (M+H)+ | 1 |
| Ser3                              | 6     | 162,255 | 88,3    | 16   | 19  | 2   | (M+H)+ | 1 |
| SerIS                             | 6     | 165,255 | 63      | 16   | 23  | 6   | (M+H)+ | 1 |
| Thr1                              | 7,2   | 176,24  | 73,9    | 16   | 23  | 10  | (M+H)+ | 1 |
| Thr2                              | 7,2   | 176,24  | 55,9    | 16   | 31  | 6   | (M+H)+ | 1 |
| Thr3                              | 7,2   | 176,24  | 102,1   | 16   | 19  | 4   | (M+H)+ | 1 |
| ThrIS                             | 7,2   | 180,24  | 75,9    | 16   | 23  | 10  | (M+H)+ | 1 |
| Trp1                              | 13,3  | 261,284 | 244,2   | 21   | 17  | 10  | (M+H)+ | 1 |
| Trp2                              | 13,3  | 261,284 | 159,3   | 21   | 25  | 6   | (M+H)+ | 1 |
| Trp3                              | 13,3  | 261,284 | 132,4   | 21   | 41  | 6   | (M+H)+ | 1 |
| TrpIS                             | 13,3  | 266,284 | 249,2   | 21   | 17  | 10  | (M+H)+ | 1 |
| Tyr1                              | 10,24 | 238,241 | 136,1   | 21   | 23  | 6   | (M+H)+ | 1 |
| Tyr2                              | 10,24 | 238,241 | 91,2    | 21   | 47  | 4   | (M+H)+ | 1 |
| Tyr3                              | 10,24 | 238,241 | 119,2   | 21   | 37  | 4   | (M+H)+ | 1 |
| TyrIS                             | 10,24 | 244,266 | 142,2   | 16   | 23  | 8   | (M+H)+ | 1 |
| Val1                              | 10,8  | 174,213 | 72      | 16   | 19  | 8   | (M+H)+ | 1 |
| Val2                              | 10,8  | 174,213 | 55      | 16   | 41  | 6   | (M+H)+ | 1 |
| Val3                              | 10,8  | 174,213 | 118,2   | 16   | 15  | 6   | (M+H)+ | 1 |
| ValIS                             | 10,8  | 182,275 | 80,2    | 16   | 21  | 10  | (M+H)+ | 1 |
| <b>Non-esterified fatty acids</b> |       |         |         |      |     |     |        |   |
| 4_0                               | 0,7   | 87      | 87      | -45  | -8  | -7  | (M-H)- | 1 |
| 5_0                               | 0,8   | 101     | 101     | -45  | -8  | -7  | (M-H)- | 1 |
| 6_0                               | 1,0   | 115,1   | 115,1   | -50  | -8  | -7  | (M-H)- | 1 |
| 7_0                               | 1,2   | 129,1   | 129,1   | -50  | -8  | -7  | (M-H)- | 1 |
| 8_0                               | 1,6   | 143,1   | 143,1   | -55  | -8  | -7  | (M-H)- | 1 |
| 9_0                               | 2,0   | 157,1   | 157,1   | -55  | -8  | -7  | (M-H)- | 1 |
| 10_0                              | 2,4   | 171,146 | 171,146 | -60  | -8  | -13 | (M-H)- | 1 |
| 11_0                              | 2,7   | 185,162 | 185,162 | -65  | -8  | -11 | (M-H)- | 1 |
| 12_0                              | 3,1   | 199,178 | 199,178 | -68  | -8  | -11 | (M-H)- | 1 |
| 12_1                              | 2,6   | 197,162 | 197,162 | -72  | -8  | -7  | (M-H)- | 1 |
| 13_0                              | 3,5   | 213,193 | 213,193 | -70  | -8  | -17 | (M-H)- | 1 |
| 13_1                              | 2,9   | 211,178 | 211,178 | -74  | -8  | -7  | (M-H)- | 1 |
| 14_0                              | 3,9   | 227,209 | 227,209 | -120 | -25 | -13 | (M-H)- | 1 |
| 14_1                              | 3,3   | 225,193 | 225,193 | -75  | -8  | -13 | (M-H)- | 1 |
| 14_2                              | 2,7   | 223,178 | 223,178 | -78  | -8  | -7  | (M-H)- | 1 |
| 15_0                              | 4,2   | 241,225 | 241,225 | -75  | -8  | -7  | (M-H)- | 1 |
| 15_1                              | 3,7   | 239,209 | 239,209 | -75  | -10 | -7  | (M-H)- | 1 |
| 16_0                              | 4,6   | 255,24  | 255,24  | -150 | -35 | -13 | (M-H)- | 1 |
| 16_1                              | 4,0   | 253,225 | 253,225 | -78  | -30 | -13 | (M-H)- | 1 |
| 16_2                              | 3,5   | 251,209 | 251,209 | -79  | -8  | -7  | (M-H)- | 1 |
| 16_3                              | 2,9   | 249,193 | 249,193 | -78  | -8  | -7  | (M-H)- | 1 |
| 16_4                              | 2,4   | 247,178 | 247,178 | -78  | -8  | -7  | (M-H)- | 1 |
| 17_0                              | 5,0   | 269,256 | 269,256 | -85  | -12 | -7  | (M-H)- | 1 |
| 17_1                              | 4,4   | 267,24  | 267,24  | -75  | -10 | -7  | (M-H)- | 1 |

[illegible]

| Parameters for mass-spectrometry detection and identifications for phospholipids and acyl-carnitines. |                 |       |      |         |        |        |              |
|-------------------------------------------------------------------------------------------------------|-----------------|-------|------|---------|--------|--------|--------------|
| ID                                                                                                    | Sofia.ID        | Q1    | Q3   | CP1     | CP2    | Adduct | MSI ID Level |
| Carn.C0                                                                                               | Carn            | 162,1 | 85,1 | 29,25   | 29,85  | (M+H)+ | 1            |
| Carn.C10                                                                                              | Carn.C10        | 316,2 | 85,1 | 0,1465  | 0,1395 | (M+H)+ | 1            |
| Carn.C10.1                                                                                            | Carn.C10.1      | 314,2 | 85,1 | 0,13    | 0,122  | (M+H)+ | 1            |
| Carn.C10.2                                                                                            | Carn.C10.2      | 312,2 | 85,1 | 0,0275  | 0,0275 | (M+H)+ | 1            |
| Carn.C12                                                                                              | Carn.C12        | 344,3 | 85,1 | 0,06975 | 0,0705 | (M+H)+ | 1            |
| Carn.C12.1                                                                                            | Carn.C12.1      | 342,3 | 85,1 | 0,13875 | 0,1245 | (M+H)+ | 1            |
| Carn.C12.DC                                                                                           | Carn.C12.DC     | 374,3 | 85,1 | 0,0475  | 0,0495 | (M+H)+ | 1            |
| Carn.C14                                                                                              | Carn.C14        | 372,3 | 85,1 | 0,03875 | 0,037  | (M+H)+ | 1            |
| Carn.C14.1                                                                                            | Carn.C14.1      | 370,3 | 85,1 | 0,07725 | 0,078  | (M+H)+ | 1            |
| Carn.C14.1.OH                                                                                         | Carn.C14.1.OH   | 386,3 | 85,1 | 0,0095  | 0,0095 | (M+H)+ | 1            |
| Carn.C14.2                                                                                            | Carn.C14.2      | 368,3 | 85,1 | 0,014   | 0,0135 | (M+H)+ | 1            |
| Carn.C14.2.OH                                                                                         | Carn.C14.2.OH   | 384,3 | 85,1 | 0,0075  | 0,007  | (M+H)+ | 1            |
| Carn.C16                                                                                              | Carn.C16        | 400,3 | 85,1 | 0,075   | 0,0775 | (M+H)+ | 1            |
| Carn.C16.1                                                                                            | Carn.C16.1      | 398,3 | 85,1 | 0,02625 | 0,027  | (M+H)+ | 1            |
| Carn.C16.1.OH                                                                                         | Carn.C16.1.OH   | 414,3 | 85,1 | 0,01    | 0,0095 | (M+H)+ | 1            |
| Carn.C16.2                                                                                            | Carn.C16.2      | 396,3 | 85,1 | 0,0045  | 0,005  | (M+H)+ | 1            |
| Carn.C16.2.OH                                                                                         | Carn.C16.2.OH   | 412,3 | 85,1 | 0,01    | 0,0095 | (M+H)+ | 1            |
| Carn.C16.OH                                                                                           | Carn.C16.OH     | 416,3 | 85,1 | 0,0055  | 0,0055 | (M+H)+ | 1            |
| Carn.C18                                                                                              | Carn.C18        | 428,4 | 85,1 | 0,03425 | 0,0355 | (M+H)+ | 1            |
| Carn.C18.1                                                                                            | Carn.C18.1      | 426,4 | 85,1 | 0,0915  | 0,0915 | (M+H)+ | 1            |
| Carn.C18.1.OH                                                                                         | Carn.C18.1.OH   | 442,4 | 85,1 | 0,0075  | 0,0075 | (M+H)+ | 1            |
| Carn.C18.2                                                                                            | Carn.C18.2      | 424,3 | 85,1 | 0,043   | 0,043  | (M+H)+ | 1            |
| Carn.C2                                                                                               | Carn.C2         | 204,1 | 85,1 | 4,48    | 4,52   | (M+H)+ | 1            |
| Carn.C3                                                                                               | Carn.C3         | 218,1 | 85,1 | 0,345   | 0,355  | (M+H)+ | 1            |
| Carn.C3.1                                                                                             | Carn.C3.1       | 216,1 | 85,1 | 0,0055  | 0,005  | (M+H)+ | 1            |
| Carn.C3.DC.C4.OH.                                                                                     | Carn.C3.DC      | 248,1 | 85,1 | 0,03875 | 0,0495 | (M+H)+ | 1            |
| Carn.C3.OH                                                                                            | Carn.C3.OH      | 234,1 | 85,1 | 0,02125 | 0,022  | (M+H)+ | 1            |
| Carn.C4                                                                                               | Carn.C4         | 232,2 | 85,1 | 0,179   | 0,1875 | (M+H)+ | 1            |
| Carn.C4.1                                                                                             | Carn.C4.1       | 230,1 | 85,1 | 0,019   | 0,019  | (M+H)+ | 1            |
| Carn.C5                                                                                               | Carn.C5         | 246,2 | 85,1 | 0,10375 | 0,103  | (M+H)+ | 1            |
| Carn.C5.1                                                                                             | Carn.C5.1       | 244,2 | 85,1 | 0,0195  | 0,02   | (M+H)+ | 1            |
| Carn.C5.1.DC                                                                                          | Carn.C5.1.DC    | 274,1 | 85,1 | 0,0175  | 0,015  | (M+H)+ | 1            |
| Carn.C5.DC.C6.OH.                                                                                     | Carn.C5.DC      | 276,1 | 85,1 | 0,01925 | 0,0205 | (M+H)+ | 1            |
| Carn.C5.M.DC                                                                                          | Carn.C5.M.DC    | 290,2 | 85,1 | 0,03225 | 0,031  | (M+H)+ | 1            |
| Carn.C5.OH.C3.DC.M.                                                                                   | Carn.C5.OH      | 262,2 | 85,1 | 0,0575  | 0,0615 | (M+H)+ | 1            |
| Carn.C6.1                                                                                             | Carn.C6.1       | 258,2 | 85,1 | 0,0125  | 0,0125 | (M+H)+ | 1            |
| Carn.C6.C4.1.DC.                                                                                      | Carn.C6         | 260,2 | 85,1 | 0,04475 | 0,046  | (M+H)+ | 1            |
| Carn.C7.DC                                                                                            | Carn.C7.DC      | 304,2 | 85,1 | 0,02575 | 0,027  | (M+H)+ | 1            |
| Carn.C8                                                                                               | Carn.C8         | 288,2 | 85,1 | 0,1105  | 0,1195 | (M+H)+ | 1            |
| Carn.C8.1                                                                                             | Carn.C8.1       | 286,2 | 85,1 | 0,07525 | 0,0745 | (M+H)+ | 1            |
| Carn.C9                                                                                               | Carn.C9         | 302,2 | 85,1 | 0,03425 | 0,034  | (M+H)+ | 1            |
| lysoPCaC14.0                                                                                          | lyso.PC.a.C14.0 | 468,3 | 184  | 2,575   | 2,615  | (M+H)+ | 1            |
| lysoPCaC16.0                                                                                          | lyso.PC.a.C16.0 | 496,3 | 184  | 98,775  | 95,6   | (M+H)+ | 1            |
| lysoPCaC16.1                                                                                          | lyso.PC.a.C16.1 | 494,3 | 184  | 3       | 2,96   | (M+H)+ | 1            |

|              |                 |       |     |         |        |        |   |
|--------------|-----------------|-------|-----|---------|--------|--------|---|
| lysoPCaC17.0 | lyso.PC.a.C17.0 | 510,4 | 184 | 1,7325  | 1,66   | (M+H)+ | 1 |
| lysoPCaC18.0 | lyso.PC.a.C18.0 | 524,4 | 184 | 26,675  | 26,2   | (M+H)+ | 1 |
| lysoPCaC18.1 | lyso.PC.a.C18.1 | 522,4 | 184 | 18,275  | 18,05  | (M+H)+ | 1 |
| lysoPCaC18.2 | lyso.PC.a.C18.2 | 520,3 | 184 | 32,6    | 32,15  | (M+H)+ | 1 |
| lysoPCaC20.3 | lyso.PC.a.C20.3 | 546,4 | 184 | 1,96    | 2,03   | (M+H)+ | 1 |
| lysoPCaC20.4 | lyso.PC.a.C20.4 | 544,3 | 184 | 6,5375  | 6,48   | (M+H)+ | 1 |
| lysoPCaC24.0 | lyso.PC.a.C24.0 | 608,5 | 184 | 0,76625 | 0,8805 | (M+H)+ | 1 |
| lysoPCaC26.0 | lyso.PC.a.C26.0 | 636,5 | 184 | 1,815   | 2,22   | (M+H)+ | 1 |
| lysoPCaC26.1 | lyso.PC.a.C26.1 | 634,5 | 184 | 3,4275  | 3,71   | (M+H)+ | 1 |
| lysoPCaC28.0 | lyso.PC.a.C28.0 | 664,5 | 184 | 1,3125  | 1,535  | (M+H)+ | 1 |
| lysoPCaC28.1 | lyso.PC.a.C28.1 | 662,5 | 184 | 1,52    | 1,785  | (M+H)+ | 1 |
| lysoPCaC6.0  | lyso.PC.a.C6.0  | 356,2 | 184 | 0,05025 | 0,0455 | (M+H)+ | 1 |
| PCaaC24.0    | PC.aa.C24.0     | 622,4 | 184 | 0,4935  | 0,596  | (M+H)+ | 1 |
| PCaaC26.0    | PC.aa.C26.0     | 650,5 | 184 | 2,735   | 3,33   | (M+H)+ | 1 |
| PCaaC28.1    | PC.aa.C28.1     | 676,5 | 184 | 2,6525  | 2,775  | (M+H)+ | 1 |
| PCaaC30.0    | PC.aa.C30.0     | 706,5 | 184 | 3,49    | 3,535  | (M+H)+ | 1 |
| PCaaC30.2    | PC.aa.C30.2     | 702,5 | 184 | 0,51625 | 0,548  | (M+H)+ | 1 |
| PCaaC32.0    | PC.aa.C32.0     | 734,6 | 184 | 11      | 11,05  | (M+H)+ | 1 |
| PCaaC32.1    | PC.aa.C32.1     | 732,6 | 184 | 13,3    | 13,75  | (M+H)+ | 1 |
| PCaaC32.2    | PC.aa.C32.2     | 730,5 | 184 | 2,8125  | 2,87   | (M+H)+ | 1 |
| PCaaC32.3    | PC.aa.C32.3     | 728,5 | 184 | 0,5415  | 0,525  | (M+H)+ | 1 |
| PCaaC34.1    | PC.aa.C34.1     | 760,6 | 184 | 167,5   | 167,5  | (M+H)+ | 1 |
| PCaaC34.2    | PC.aa.C34.2     | 758,6 | 184 | 278,75  | 282    | (M+H)+ | 1 |
| PCaaC34.3    | PC.aa.C34.3     | 756,6 | 184 | 14,65   | 13,6   | (M+H)+ | 1 |
| PCaaC34.4    | PC.aa.C34.4     | 754,5 | 184 | 1,675   | 1,65   | (M+H)+ | 1 |
| PCaaC36.0    | PC.aa.C36.0     | 790,6 | 184 | 2,305   | 2,095  | (M+H)+ | 1 |
| PCaaC36.1    | PC.aa.C36.1     | 788,6 | 184 | 35,4    | 34,15  | (M+H)+ | 1 |
| PCaaC36.2    | PC.aa.C36.2     | 786,6 | 184 | 170,5   | 173    | (M+H)+ | 1 |
| PCaaC36.3    | PC.aa.C36.3     | 784,6 | 184 | 97,8    | 98,9   | (M+H)+ | 1 |
| PCaaC36.4    | PC.aa.C36.4     | 782,6 | 184 | 125     | 127    | (M+H)+ | 1 |
| PCaaC36.5    | PC.aa.C36.5     | 780,6 | 184 | 15,975  | 15,75  | (M+H)+ | 1 |
| PCaaC36.6    | PC.aa.C36.6     | 778,5 | 184 | 0,9525  | 0,848  | (M+H)+ | 1 |
| PCaaC38.0    | PC.aa.C38.0     | 818,7 | 184 | 1,8325  | 1,81   | (M+H)+ | 1 |
| PCaaC38.1    | PC.aa.C38.1     | 816,6 | 184 | 1,17    | 0,9875 | (M+H)+ | 1 |
| PCaaC38.3    | PC.aa.C38.3     | 812,6 | 184 | 29,275  | 28,55  | (M+H)+ | 1 |
| PCaaC38.4    | PC.aa.C38.4     | 810,6 | 184 | 69,225  | 72,3   | (M+H)+ | 1 |
| PCaaC38.5    | PC.aa.C38.5     | 808,6 | 184 | 34,775  | 35,8   | (M+H)+ | 1 |
| PCaaC38.6    | PC.aa.C38.6     | 806,6 | 184 | 47,4    | 49,6   | (M+H)+ | 1 |
| PCaaC40.1    | PC.aa.C40.1     | 844,7 | 184 | 0,457   | 0,425  | (M+H)+ | 1 |
| PCaaC40.2    | PC.aa.C40.2     | 842,7 | 184 | 0,51675 | 0,436  | (M+H)+ | 1 |
| PCaaC40.3    | PC.aa.C40.3     | 840,6 | 184 | 0,72825 | 0,646  | (M+H)+ | 1 |
| PCaaC40.4    | PC.aa.C40.4     | 838,6 | 184 | 2,4325  | 2,51   | (M+H)+ | 1 |
| PCaaC40.5    | PC.aa.C40.5     | 836,6 | 184 | 6,835   | 7,19   | (M+H)+ | 1 |
| PCaaC40.6    | PC.aa.C40.6     | 834,6 | 184 | 15,6    | 16,6   | (M+H)+ | 1 |
| PCaaC42.0    | PC.aa.C42.0     | 874,7 | 184 | 0,4535  | 0,4445 | (M+H)+ | 1 |
| PCaaC42.1    | PC.aa.C42.1     | 872,7 | 184 | 0,2585  | 0,245  | (M+H)+ | 1 |



|             |                   |       |     |         |        |        |   |
|-------------|-------------------|-------|-----|---------|--------|--------|---|
| PCaaC42.2   | PC.aa.C42.2       | 870,7 | 184 | 0,2725  | 0,233  | (M+H)+ | 1 |
| PCaaC42.4   | PC.aa.C42.4       | 866,7 | 184 | 0,248   | 0,222  | (M+H)+ | 1 |
| PCaaC42.5   | PC.aa.C42.5       | 864,6 | 184 | 0,3165  | 0,3175 | (M+H)+ | 1 |
| PCaaC42.6   | PC.aa.C42.6       | 862,6 | 184 | 0,55475 | 0,58   | (M+H)+ | 1 |
| PCaeC30.0   | PC.ae.C30.0       | 692,6 | 184 | 0,432   | 0,4415 | (M+H)+ | 1 |
| PCaeC30.1   | PC.ae.C30.1       | 690,5 | 184 | 0,691   | 0,882  | (M+H)+ | 1 |
| PCaeC30.2   | PC.ae.C30.2       | 688,5 | 184 | 0,249   | 0,2505 | (M+H)+ | 1 |
| PCaeC32.1   | PC.ae.C32.1       | 718,6 | 184 | 2,2625  | 2,28   | (M+H)+ | 1 |
| PCaeC32.2   | PC.ae.C32.2       | 716,6 | 184 | 0,798   | 0,8295 | (M+H)+ | 1 |
| PCaeC34.0   | PC.ae.C34.0       | 748,6 | 184 | 1,3025  | 1,275  | (M+H)+ | 1 |
| PCaeC34.1   | PC.ae.C34.1       | 746,6 | 184 | 7,3125  | 7,285  | (M+H)+ | 1 |
| PCaeC34.2   | PC.ae.C34.2       | 744,6 | 184 | 8,33    | 8,28   | (M+H)+ | 1 |
| PCaeC34.3   | PC.ae.C34.3       | 742,6 | 184 | 5,845   | 6,035  | (M+H)+ | 1 |
| PCaeC36.0   | PC.ae.C36.0       | 776,7 | 184 | 0,765   | 0,7355 | (M+H)+ | 1 |
| PCaeC36.1   | PC.ae.C36.1       | 774,6 | 184 | 7,6675  | 6,57   | (M+H)+ | 1 |
| PCaeC36.2   | PC.ae.C36.2       | 772,6 | 184 | 11,525  | 10,75  | (M+H)+ | 1 |
| PCaeC36.3   | PC.ae.C36.3       | 770,6 | 184 | 5,5775  | 5,515  | (M+H)+ | 1 |
| PCaeC36.4   | PC.ae.C36.4       | 768,6 | 184 | 11,05   | 11,15  | (M+H)+ | 1 |
| PCaeC36.5   | PC.ae.C36.5       | 766,6 | 184 | 7,2275  | 7,405  | (M+H)+ | 1 |
| PCaeC38.0   | PC.ae.C38.0       | 804,7 | 184 | 2,195   | 2,045  | (M+H)+ | 1 |
| PCaeC38.1   | PC.ae.C38.1       | 802,7 | 184 | 1,8875  | 1,41   | (M+H)+ | 1 |
| PCaeC38.2   | PC.ae.C38.2       | 800,7 | 184 | 3,125   | 2,535  | (M+H)+ | 1 |
| PCaeC38.3   | PC.ae.C38.3       | 798,6 | 184 | 5,1625  | 4,68   | (M+H)+ | 1 |
| PCaeC38.4   | PC.ae.C38.4       | 796,6 | 184 | 9,3975  | 9,28   | (M+H)+ | 1 |
| PCaeC38.5   | PC.ae.C38.5       | 794,6 | 184 | 10,525  | 10,55  | (M+H)+ | 1 |
| PCaeC38.6   | PC.ae.C38.6       | 792,6 | 184 | 4,71    | 4,805  | (M+H)+ | 1 |
| PCaeC40.0   | PC.ae.C40.0       | 832,7 | 184 | 7,225   | 7,365  | (M+H)+ | 1 |
| PCaeC40.1   | PC.ae.C40.1       | 830,7 | 184 | 1,555   | 1,55   | (M+H)+ | 1 |
| PCaeC40.2   | PC.ae.C40.2       | 828,7 | 184 | 1,7025  | 1,6    | (M+H)+ | 1 |
| PCaeC40.3   | PC.ae.C40.3       | 826,7 | 184 | 1,65    | 1,45   | (M+H)+ | 1 |
| PCaeC40.4   | PC.ae.C40.4       | 824,7 | 184 | 2,0575  | 1,955  | (M+H)+ | 1 |
| PCaeC40.5   | PC.ae.C40.5       | 822,6 | 184 | 3,285   | 3,24   | (M+H)+ | 1 |
| PCaeC40.6   | PC.ae.C40.6       | 820,6 | 184 | 2,885   | 2,93   | (M+H)+ | 1 |
| PCaeC42.0   | PC.ae.C42.0       | 860,7 | 184 | 0,52825 | 0,533  | (M+H)+ | 1 |
| PCaeC42.1   | PC.ae.C42.1       | 858,7 | 184 | 0,53275 | 0,5395 | (M+H)+ | 1 |
| PCaeC42.2   | PC.ae.C42.2       | 856,7 | 184 | 0,54675 | 0,5235 | (M+H)+ | 1 |
| PCaeC42.3   | PC.ae.C42.3       | 854,7 | 184 | 1,065   | 0,9655 | (M+H)+ | 1 |
| PCaeC42.4   | PC.ae.C42.4       | 852,7 | 184 | 0,83025 | 0,7745 | (M+H)+ | 1 |
| PCaeC42.5   | PC.ae.C42.5       | 850,7 | 184 | 1,765   | 1,76   | (M+H)+ | 1 |
| PCaeC44.3   | PC.ae.C44.3       | 882,7 | 184 | 0,28225 | 0,219  | (M+H)+ | 1 |
| PCaeC44.4   | PC.ae.C44.4       | 880,7 | 184 | 0,4375  | 0,412  | (M+H)+ | 1 |
| PCaeC44.5   | PC.ae.C44.5       | 878,7 | 184 | 1,4725  | 1,51   | (M+H)+ | 1 |
| PCaeC44.6   | PC.ae.C44.6       | 876,7 | 184 | 0,85425 | 0,8785 | (M+H)+ | 1 |
| SM.OH.C14.1 | SM.C18.1.OH.C14.1 | 689,5 | 184 | 4,4825  | 4,26   | (M+H)+ | 1 |
| SM.OH.C16.1 | SM.C18.1.OH.C16.1 | 717,6 | 184 | 2,065   | 2,075  | (M+H)+ | 1 |
| SM.OH.C22.1 | SM.C18.1.OH.C22.1 | 801,6 | 184 | 8,58    | 8,365  | (M+H)+ | 1 |

|                                                                                                                                                                                                                                                                                                                                                                                                                                                                                                                                                                                                                            |                   |       |     |         |        |        |   |
|----------------------------------------------------------------------------------------------------------------------------------------------------------------------------------------------------------------------------------------------------------------------------------------------------------------------------------------------------------------------------------------------------------------------------------------------------------------------------------------------------------------------------------------------------------------------------------------------------------------------------|-------------------|-------|-----|---------|--------|--------|---|
| SM.OH.C22.2                                                                                                                                                                                                                                                                                                                                                                                                                                                                                                                                                                                                                | SM.C18.1.OH.C22.2 | 799,6 | 184 | 6,26    | 6,14   | (M+H)+ | 1 |
| SM.OH.C24.1                                                                                                                                                                                                                                                                                                                                                                                                                                                                                                                                                                                                                | SM.C18.1.OH.C24.1 | 829,7 | 184 | 0,9405  | 0,9585 | (M+H)+ | 1 |
| SMC16.0                                                                                                                                                                                                                                                                                                                                                                                                                                                                                                                                                                                                                    | SM.C18.1.C16.0    | 703,6 | 184 | 76,4    | 75     | (M+H)+ | 1 |
| SMC16.1                                                                                                                                                                                                                                                                                                                                                                                                                                                                                                                                                                                                                    | SM.C18.1.C16.1    | 701,6 | 184 | 10,525  | 10,55  | (M+H)+ | 1 |
| SMC18.0                                                                                                                                                                                                                                                                                                                                                                                                                                                                                                                                                                                                                    | SM.C18.1.C18.0    | 731,6 | 184 | 14,575  | 14,35  | (M+H)+ | 1 |
| SMC18.1                                                                                                                                                                                                                                                                                                                                                                                                                                                                                                                                                                                                                    | SM.C18.1.C18.1    | 729,6 | 184 | 7,1225  | 7,025  | (M+H)+ | 1 |
| SMC20.2                                                                                                                                                                                                                                                                                                                                                                                                                                                                                                                                                                                                                    | SM.C18.1.C20.2    | 755,6 | 184 | 0,322   | 0,282  | (M+H)+ | 1 |
| SMC22.3                                                                                                                                                                                                                                                                                                                                                                                                                                                                                                                                                                                                                    | SM.C18.1.C22.3    | 781,6 | 184 | 1,7625  | 1,755  | (M+H)+ | 1 |
| SMC24.0                                                                                                                                                                                                                                                                                                                                                                                                                                                                                                                                                                                                                    | SM.C18.1.C24.0    | 815,7 | 184 | 14,8    | 14,3   | (M+H)+ | 1 |
| SMC24.1                                                                                                                                                                                                                                                                                                                                                                                                                                                                                                                                                                                                                    | SM.C18.1.C24.1    | 813,7 | 184 | 33      | 32,15  | (M+H)+ | 1 |
| SMC26.0                                                                                                                                                                                                                                                                                                                                                                                                                                                                                                                                                                                                                    | SM.C18.1.C26.0    | 843,7 | 184 | 0,07225 | 0,0815 | (M+H)+ | 1 |
| SMC26.1                                                                                                                                                                                                                                                                                                                                                                                                                                                                                                                                                                                                                    | SM.C18.1.C26.1    | 841,7 | 184 | 0,28175 | 0,2855 | (M+H)+ | 1 |
| Sum of Hexoses                                                                                                                                                                                                                                                                                                                                                                                                                                                                                                                                                                                                             | Sum of Hexoses    | 179   | 89  | 22237,5 | 22592  | (M+H)+ | 1 |
| ID metabolite identity metabolomics laboratory. Sofia ID metabolite identity Generation R Study group. Q1/Q3 Quadrupole 1 and 3, CP1/CP2 Calibrators 1 and 2, MSI ID Metabolomics Standards Initiative identification.<br>This table is adapted from: Voerman, E., Jaddoe, V. W. V., Uhl, O., & Shokry, E. (2020). A population based resource for intergenerational metabolomics analysis in pregnant women and their children : the Generation R Study. <i>Metabolomics</i> , 1 – 26. Voerman et al. 2020 describes the acquisition, processing and structure of the metabolomics data in the Generation R study cohort. |                   |       |     |         |        |        |   |

## REFERENCES

1. Voerman E, Jaddoe VWV, Uhl O, et al. A population-based resource for intergenerational metabolomics analyses in pregnant women and their children: the Generation R Study. *Metabolomics* 2020; **16**(4): 43-.
2. Hellmuth C, Uhl O, Standl M, et al. Cord Blood Metabolome Is Highly Associated with Birth Weight, but Less Predictive for Later Weight Development. *Obes Facts* 2017; **10**(2): 85-100.
3. Hellmuth C, Weber M, Koletzko B, Peissner W. Nonesterified Fatty Acid Determination for Functional Lipidomics: Comprehensive Ultrahigh Performance Liquid Chromatography–Tandem Mass Spectrometry Quantitation, Qualification, and Parameter Prediction. *Analytical Chemistry* 2012; **84**(3): 1483-90.
4. Uhl O, Fleddermann M, Hellmuth C, Demmelmair H, Koletzko B. Phospholipid Species in Newborn and 4 Month Old Infants after Consumption of Different Formulas or Breast Milk. *PLoS One* 2016; **11**(8): e0162040-e.

**Table S2.** Maternal early-pregnancy serum metabolite concentrations

| Maternal early-pregnancy metabolite or metabolite group | Median (95% range), $\mu\text{mol/L}$ |
|---------------------------------------------------------|---------------------------------------|
| <b>Amino acids (AA)</b>                                 | <b>2880.7 (1990.8, 3971.2)</b>        |
| <b>Branched-chain AA</b>                                | <b>430.7 (269.4, 723.9)</b>           |
| <b>Aromatic AA</b>                                      | <b>214.4 (139.3, 232.3)</b>           |
| <b>Essential AA</b>                                     | <b>1022.3 (668.2, 1531.1)</b>         |
| <b>Non-essential AA</b>                                 | <b>1848.0 (1249.8, 2482.6)</b>        |
| Alanine                                                 | 404.8 (257.3, 626.6)                  |
| Arginine                                                | 91.4 (57.3, 136.8)                    |
| Asparagine                                              | 63.1 (41.1, 92.2)                     |
| Aspartic acid                                           | 37.6 (20.1, 63.5)                     |
| Citrulline                                              | 19.7 (10.5, 33.4)                     |
| Glutamine                                               | 447.0 (277.1, 738.4)                  |
| Glucose                                                 | 90.6 (45.1, 157.3)                    |
| Glycine                                                 | 218.4 (135.0, 332.1)                  |
| Histidine                                               | 102.9 (60.3, 156.3)                   |
| Isoleucine                                              | 61.5 (30.9, 115.2)                    |
| Leucine                                                 | 131.8 (78.3, 232.9)                   |
| Lysine                                                  | 161.1 (95.0, 260.5)                   |
| Methionine                                              | 22.9 (13.1, 39.9)                     |
| Ornithine                                               | 57.3 (31.3, 97.9)                     |
| Phenylalanine                                           | 87.5 (56.4, 128.1)                    |
| Proline                                                 | 194.9 (100.7, 366.1)                  |
| Tryptophan                                              | 60.7 (37.9, 93.4)                     |
| Serine                                                  | 111.0 (62.4, 171.6)                   |
| Threonine                                               | 138.5 (81.3, 234.3)                   |
| Tyrosine                                                | 64.1 (35.4, 113.0)                    |
| Valine                                                  | 239.8 (145.5, 382.0)                  |
| Cysteine                                                | 15.3 (5.0, 29.9)                      |
| <b>Non-esterified fatty acids (NEFA)</b>                | <b>143.9 (52.9, 458.9)</b>            |
| <b>Saturated NEFA</b>                                   | <b>58.8 (18.5, 186.2)</b>             |
| <b>Mono-unsaturated NEFA</b>                            | <b>49.1 (15.7, 174.8)</b>             |
| <b>Poly-unsaturated NEFA</b>                            | <b>34.8 (13.9, 99.9)</b>              |
| NEFA_14_0                                               | 4.4 (1.2, 15.2)                       |
| NEFA_14_1                                               | 0.6 (0.1, 2.6)                        |
| NEFA_15_0                                               | 0.9 (0.2, 3.0)                        |
| NEFA_16_0                                               | 41.7 (10.2, 132.1)                    |
| NEFA_16_1                                               | 4.4 (1.3, 18.3)                       |
| NEFA_16_2                                               | 0.2 (0.0, 0.6)                        |
| NEFA_17_0                                               | 1.0 (0.3, 3.0)                        |
| NEFA_17_1                                               | 0.4 (0.0, 1.6)                        |
| NEFA_17_2                                               | 0.0 (0.0, 0.1)                        |
| NEFA_18_0                                               | 10.7 (1.4, 34.9)                      |
| NEFA_18_1                                               | 42.4 (12.7, 150.9)                    |
| NEFA_18_2                                               | 23.4 (8.8, 75.0)                      |
| NEFA_18_3                                               | 2.5 (0.6, 9.1)                        |

|                                                  |                                |
|--------------------------------------------------|--------------------------------|
| NEFA_19_1                                        | 0.2 (0.1, 0.7)                 |
| NEFA_20_1                                        | 0.6 (0.1, 2.0)                 |
| NEFA_20_2                                        | 0.4 (0.1, 1.3)                 |
| NEFA_20_3                                        | 0.7 (0.2, 1.8)                 |
| NEFA_20_4                                        | 4.3 (1.8, 9.0)                 |
| NEFA_20_5                                        | 0.3 (0.1, 0.8)                 |
| NEFA_22_3                                        | 0.0 (0.0, 0.1)                 |
| NEFA_22_4                                        | 0.3 (0.1, 0.7)                 |
| NEFA_22_5                                        | 0.4 (0.2, 1.1)                 |
| NEFA_22_6                                        | 1.5 (0.4, 4.4)                 |
| NEFA_24_0                                        | 0.2 (0.1, 0.6)                 |
| NEFA_24_1                                        | 0.1 (0.0, 0.3)                 |
| NEFA_24_2                                        | 0.0 (0.0, 0.1)                 |
| NEFA_24_4                                        | 0.0 (0.0, 0.1)                 |
| NEFA_24_5                                        | 0.0 (0.0, 0.1)                 |
| NEFA_26_0                                        | 0.2 (0.1, 0.5)                 |
| NEFA_26_1                                        | 0.1 (0.0, 0.3)                 |
| NEFA_26_2                                        | 0.1 (0.0, 0.2)                 |
| <b>Acyl-lysosphosphatidylcholines (LysoPCa)</b>  | <b>182.6 (81.4, 229.7)</b>     |
| <b>Saturated LysoPCa</b>                         | <b>127.3 (70.8, 214.7)</b>     |
| <b>Mono-unsaturated LysoPCa</b>                  | <b>19.1 (10.3, 32.4)</b>       |
| <b>Poly-unsaturated LysoPCa</b>                  | <b>35.9 (19.2, 66.9)</b>       |
| Lyso.PC.a.C14.0                                  | 3.3 (1.0, 7.3)                 |
| Lyso.PC.a.C16.0                                  | 98.6 (54.8, 170.6)             |
| Lyso.PC.a.C16.1                                  | 2.1 (0.9, 4.0)                 |
| Lyso.PC.a.C18.0                                  | 24.0 (13.0, 41.6)              |
| Lyso.PC.a.C18.1                                  | 16.9 (9.4, 29.2)               |
| Lyso.PC.a.C18.2                                  | 23.9 (11.8, 47.8)              |
| Lyso.PC.a.C18.3                                  | 0.4 (0.1, 1.0)                 |
| Lyso.PC.a.C20.3                                  | 2.5 (1.2, 4.8)                 |
| Lyso.PC.a.C20.4                                  | 6.1 (2.9, 11.0)                |
| Lyso.PC.a.C20.5                                  | 0.4 (0.1, 1.0)                 |
| Lyso.PC.a.C22.6                                  | 2.3 (1.1, 4.3)                 |
| <b>Alkyl-lysosphosphatidylcholines (LysoPCe)</b> | <b>3.0 (1.6, 5.1)</b>          |
| <b>Saturated LysoPCe</b>                         | <b>2.7 (1.4, 4.8)</b>          |
| <b>Mono-unsaturated LysoPCe</b>                  | <b>0.3 (0.1, 0.5)</b>          |
| Lyso.PC.e.C16.0                                  | 1.0 (0.4, 1.9)                 |
| Lyso.PC.e.C18.0                                  | 1.8 (0.9, 3.0)                 |
| Lyso.PC.e.C18.1                                  | 0.3 (0.1, 0.5)                 |
| <b>Diacyl-phosphatidylcholines (PCaa)</b>        | <b>1813.6 (1030.4, 3060.6)</b> |
| <b>Saturated PCaa</b>                            | <b>27.6 (16.0, 45.2)</b>       |
| <b>Mono-unsaturated PCaa</b>                     | <b>275.1 (144.5, 518.0)</b>    |
| <b>Poly-unsaturated PCaa</b>                     | <b>1518.4 (862.2, 2551.4)</b>  |
| PC.aa.C30.0                                      | 5.4 (2.3, 11.4)                |
| PC.aa.C30.3                                      | 0.2 (0.1, 0.4)                 |
| PC.aa.C32.0                                      | 13.9 (8.3, 23.2)               |

|                                               |                             |
|-----------------------------------------------|-----------------------------|
| PC.aa.C32.1                                   | 14.7 (6.4, 36.0)            |
| PC.aa.C32.2                                   | 5.6 (2.0, 11.7)             |
| PC.aa.C32.3                                   | 0.4 (0.2, 0.8)              |
| PC.aa.C34.1                                   | 217.2 (110.5, 405.8)        |
| PC.aa.C34.2                                   | 442.4 (239.8, 731.0)        |
| PC.aa.C34.3                                   | 17.6 (8.4, 35.4)            |
| PC.aa.C34.4                                   | 2.3 (0.9, 5.0)              |
| PC.aa.C34.5                                   | 0.2 (0.1, 0.5)              |
| PC.aa.C36.0                                   | 1.7 (0.7, 3.4)              |
| PC.aa.C36.1                                   | 41.5 (22.1, 76.9)           |
| PC.aa.C36.2                                   | 212.5 (116.4, 352.1)        |
| PC.aa.C36.3                                   | 172.7 (91.0, 318.3)         |
| PC.aa.C36.4                                   | 226.1 (120.5, 407.2)        |
| PC.aa.C36.5                                   | 20.0 (8.0, 45.1)            |
| PC.aa.C36.6                                   | 1.3 (0.4, 2.8)              |
| PC.aa.C38.0                                   | 3.8 (1.8, 6.9)              |
| PC.aa.C38.2                                   | 7.2 (3.3, 13.1)             |
| PC.aa.C38.3                                   | 51.0 (24.8, 104.0)          |
| PC.aa.C38.4                                   | 108.6 (57.5, 194.3)         |
| PC.aa.C38.5                                   | 54.9 (28.3, 101.5)          |
| PC.aa.C38.6                                   | 126.3 (59.5, 232.5)         |
| PC.aa.C40.0                                   | 1.3 (0.5, 2.5)              |
| PC.aa.C40.1                                   | 0.6 (0.2, 1.2)              |
| PC.aa.C40.2                                   | 0.4 (0.1, 0.7)              |
| PC.aa.C40.3                                   | 0.6 (0.2, 1.2)              |
| PC.aa.C40.4                                   | 3.9 (1.9, 8.0)              |
| PC.aa.C40.5                                   | 12.3 (6.1, 24.1)            |
| PC.aa.C40.6                                   | 38.2 (18.1, 70.0)           |
| PC.aa.C42.0                                   | 1.0 (0.5, 1.7)              |
| PC.aa.C42.5                                   | 0.6 (0.3, 1.1)              |
| PC.aa.C43.6                                   | 3.4 (1.9, 6.0)              |
| PC.aa.C44.12                                  | 0.8 (0.4, 1.4)              |
| <b>Acyl-alkyl-phosphatidylcholines (PCae)</b> | <b>187.3 (111.1, 305.6)</b> |
| <b>Saturated PCae</b>                         | <b>27.7 (14.8, 50.3)</b>    |
| <b>Mono-unsaturated PCae</b>                  | <b>20.0 (11.1, 33.4)</b>    |
| <b>Poly-unsaturated PCae</b>                  | <b>138.6 (81.4, 229.7)</b>  |
| PC.ae.C30.0                                   | 0.5 (0.2, 1.0)              |
| PC.ae.C32.0                                   | 3.7 (2.1, 6.5)              |
| PC.ae.C32.1                                   | 2.7 (1.5, 4.7)              |
| PC.ae.C32.2                                   | 0.6 (0.3, 1.2)              |
| PC.ae.C34.0                                   | 1.5 (0.7, 2.7)              |
| PC.ae.C34.1                                   | 9.6 (5.3, 16.7)             |
| PC.ae.C34.2                                   | 10.6 (5.5, 18.2)            |
| PC.ae.C34.3                                   | 8.1 (4.1, 14.3)             |
| PC.ae.C34.4                                   | 0.3 (0.1, 0.6)              |
| PC.ae.C36.0                                   | 0.7 (0.4, 1.4)              |

|                            |                             |
|----------------------------|-----------------------------|
| PC.ae.C36.1                | 5.5 (2.6, 9.5)              |
| PC.ae.C36.2                | 14.7 (8.0, 24.7)            |
| PC.ae.C36.3                | 8.6 (4.4, 15.4)             |
| PC.ae.C36.4                | 16.4 (9.3, 29.3)            |
| PC.ae.C36.5                | 10.8 (5.5, 19.4)            |
| PC.ae.C38.0                | 2.6 (1.1, 5.6)              |
| PC.ae.C38.2                | 1.9 (0.9, 3.4)              |
| PC.ae.C38.3                | 4.4 (2.3, 8.0)              |
| PC.ae.C38.4                | 13.3 (7.5, 23.7)            |
| PC.ae.C38.5                | 17.7 (9.4, 30.5)            |
| PC.ae.C38.6                | 8.0 (3.8, 14.2)             |
| PC.ae.C40.0                | 18.3 (9.2, 35.9)            |
| PC.ae.C40.1                | 1.6 (0.7, 2.8)              |
| PC.ae.C40.2                | 1.7 (0.7, 3.2)              |
| PC.ae.C40.3                | 1.0 (0.5, 1.9)              |
| PC.ae.C40.4                | 2.9 (1.7, 5.1)              |
| PC.ae.C40.5                | 3.9 (2.2, 6.6)              |
| PC.ae.C40.6                | 5.5 (2.9, 9.6)              |
| PC.ae.C42.1                | 0.4 (0.2, 0.8)              |
| PC.ae.C42.3                | 1.0 (0.5, 1.7)              |
| PC.ae.C42.4                | 1.4 (0.7, 2.4)              |
| PC.ae.C42.5                | 3.1 (1.6, 5.9)              |
| PC.ae.C42.6                | 2.1 (1.1, 3.6)              |
| <b>Sphingomyelins (SM)</b> | <b>410.4 (252.8, 621.5)</b> |
| <b>Mono-unsaturated SM</b> | <b>200.9 (129.7, 299.5)</b> |
| <b>Poly-unsaturated SM</b> | <b>209.8 (120.5, 332.2)</b> |
| SM.a.C30.1                 | 0.5 (0.2, 0.9)              |
| SM.a.C32.1                 | 8.7 (4.9, 14.5)             |
| SM.a.C32.2                 | 0.9 (0.4, 1.5)              |
| SM.a.C33.1                 | 6.4 (3.8, 10.3)             |
| SM.a.C34.1                 | 109.8 (70.1, 167.4)         |
| SM.a.C34.2                 | 17.7 (10.5, 29.5)           |
| SM.a.C35.1                 | 0.8 (0.4, 1.3)              |
| SM.a.C36.1                 | 22.8 (13.4, 35.7)           |
| SM.a.C36.2                 | 11.1 (6.4, 19.6)            |
| SM.a.C36.3                 | 1.0 (0.5, 1.7)              |
| SM.a.C37.1                 | 2.1 (0.9, 3.7)              |
| SM.a.C38.2                 | 20.9 (9.9, 36.4)            |
| SM.a.C38.3                 | 0.7 (0.3, 1.3)              |
| SM.a.C39.1                 | 5.7 (2.7, 9.4)              |
| SM.a.C39.2                 | 1.8 (0.8, 3.0)              |
| SM.a.C40.2                 | 32.4 (17.1, 54.7)           |
| SM.a.C40.5                 | 0.8 (0.3, 2.0)              |
| SM.a.C41.1                 | 16.2 (9.3, 25.6)            |
| SM.a.C41.2                 | 13.9 (7.5, 21.6)            |
| SM.a.C42.1                 | 23.1 (14.7, 39.1)           |

|                                                                                                               |                          |
|---------------------------------------------------------------------------------------------------------------|--------------------------|
| SM.a.C42.2                                                                                                    | 62.4 (35.4, 101.2)       |
| SM.a.C42.3                                                                                                    | 27.0 (14.7, 45.8)        |
| SM.a.C42.4                                                                                                    | 8.1 (3.9, 15.1)          |
| SM.a.C42.6                                                                                                    | 5.0 (2.3, 9.3)           |
| SM.a.C43.1                                                                                                    | 1.4 (0.8, 2.4)           |
| SM.a.C43.2                                                                                                    | 2.7 (1.3, 4.8)           |
| SM.a.C44.6                                                                                                    | 1.8 (0.8, 3.4)           |
| SM.e.C36.2                                                                                                    | 0.4 (0.2, 0.8)           |
| SM.e.C38.3                                                                                                    | 0.3 (0.1, 0.6)           |
| SM.e.C40.5                                                                                                    | 0.4 (0.1, 0.7)           |
| <b>Free Carn</b>                                                                                              | <b>25.0 (13.6, 38.2)</b> |
| <b>Acyl-carnitine (Carn.a)</b>                                                                                | <b>4.9 (2.9, 8.1)</b>    |
| <b>Small-chain Carn.a</b>                                                                                     | <b>3.5 (1.9, 6.3)</b>    |
| <b>Medium-chain Carn.a</b>                                                                                    | <b>0.6 (0.3, 1.2)</b>    |
| <b>Large-chain Carn.a</b>                                                                                     | <b>0.8 (0.4, 1.4)</b>    |
| Carn.a.C10.0                                                                                                  | 0.1 (0.0, 0.4)           |
| Carn.a.C10.1                                                                                                  | 0.1 (0.0, 0.2)           |
| Carn.a.C12.0                                                                                                  | 0.1 (0.0, 0.2)           |
| Carn.a.C14.1                                                                                                  | 0.0 (0.0, 0.1)           |
| Carn.a.C14.2                                                                                                  | 0.0 (0.0, 0.1)           |
| Carn.a.C15.0                                                                                                  | 0.0 (0.0, 0.1)           |
| Carn.a.C16.0                                                                                                  | 0.1 (0.1, 0.3)           |
| Carn.a.C16.0.Oxo                                                                                              | 0.0 (0.0, 0.0)           |
| Carn.a.C16.1                                                                                                  | 0.1 (0.0, 0.2)           |
| Carn.a.C16.2                                                                                                  | 0.0 (0.0, 0.1)           |
| Carn.a.C18.0                                                                                                  | 0.1 (0.0, 0.2)           |
| Carn.a.C18.1                                                                                                  | 0.1 (0.0, 0.2)           |
| Carn.a.C18.2                                                                                                  | 0.1 (0.0, 0.1)           |
| Carn.a.C18.2.OH                                                                                               | 0.0 (0.0, 0.1)           |
| Carn.a.C2.0                                                                                                   | 2.8 (1.4, 5.4)           |
| Carn.a.C20.0                                                                                                  | 0.0 (0.0, 0.1)           |
| Carn.a.C20.1                                                                                                  | 0.0 (0.0, 0.0)           |
| Carn.a.C20.3                                                                                                  | 0.1 (0.0, 0.1)           |
| Carn.a.C20.4                                                                                                  | 0.0 (0.0, 0.0)           |
| Carn.a.C3.0                                                                                                   | 0.3 (0.2, 0.5)           |
| Carn.a.C3.0.DC                                                                                                | 0.1 (0.0, 0.1)           |
| Carn.a.C4.0                                                                                                   | 0.2 (0.1, 0.4)           |
| Carn.a.C5.0                                                                                                   | 0.1 (0.1, 0.2)           |
| Carn.a.C6.0                                                                                                   | 0.0 (0.0, 0.1)           |
| Carn.a.C6.0.OH                                                                                                | 0.0 (0.0, 0.1)           |
| Carn.a.C8.0                                                                                                   | 0.1 (0.0, 0.2)           |
| Carn.a.C8.1                                                                                                   | 0.1 (0.0, 0.1)           |
| Carn.a.C9.0                                                                                                   | 0.0 (0.0, 0.1)           |
| Values represent medians (95% range) of maternal early-pregnancy metabolite concentrations in serum (μmol/L). |                          |

**Table S3.** Associations of maternal early-pregnancy individual metabolites with systolic and diastolic blood pressure in early-, mid- and late pregnancy. Basic model.

|            | Differences in systolic blood pressure in mmHg (95% confidence interval) |         |                          |         |                           |         | Differences in diastolic blood pressure in mmHg (95% confidence interval) |         |                          |         |                           |         |
|------------|--------------------------------------------------------------------------|---------|--------------------------|---------|---------------------------|---------|---------------------------------------------------------------------------|---------|--------------------------|---------|---------------------------|---------|
| Metabolite | Early pregnancy<br>N = 803                                               | P-value | Mid pregnancy<br>N = 793 | P-value | Late pregnancy<br>N = 800 | P-value | Early pregnancy<br>N = 803                                                | P-value | Mid pregnancy<br>N = 793 | P-value | Late pregnancy<br>N = 800 | P-value |
| Ala        | 6.94 (2.86 - 16.86)                                                      | <0.001* | 4.05 (1.72 - 9.52)       | 0.011*  | 3.95 (1.85 - 8.43)        | 0.003*  | 2.01 (1.02 - 3.98)                                                        | 0.078   | 2.5 (1.29 - 4.83)        | 0.027*  | 4.25 (2.26 - 7.99)        | <0.001* |
| Arg        | 9.65 (3.99 - 23.32)                                                      | 0.000*  | 4.42 (1.87 - 10.42)      | 0.006*  | 4.68 (2.2 - 9.96)         | 0.001*  | 4.03 (2.05 - 7.92)                                                        | 0.000*  | 2.42 (1.25 - 4.69)       | 0.035*  | 3.46 (1.84 - 6.51)        | 0.001*  |
| Asn        | 2.2 (0.9 - 5.38)                                                         | 0.154   | 1 (0.42 - 2.37)          | 0.999   | 2.15 (1 - 4.6)            | 0.102   | 0.72 (0.36 - 1.42)                                                        | 0.444   | 0.79 (0.41 - 1.54)       | 0.612   | 1.46 (0.77 - 2.76)        | 0.308   |
| Asp        | 7.23 (2.97 - 17.58)                                                      | <0.001* | 8.15 (3.51 - 18.96)      | <0.001* | 8.5 (4.02 - 17.99)        | <0.001* | 6.93 (3.54 - 13.54)                                                       | <0.001* | 5.53 (2.89 - 10.57)      | <0.001* | 9.84 (5.3 - 18.28)        | <0.001* |
| Cit        | 0.87 (0.36 - 2.14)                                                       | 0.824   | 0.65 (0.27 - 1.53)       | 0.507   | 1 (0.47 - 2.15)           | 0.996   | 1.03 (0.52 - 2.04)                                                        | 0.974   | 0.64 (0.33 - 1.24)       | 0.319   | 1.07 (0.56 - 2.03)        | 0.863   |
| Gln        | 1.14 (0.47 - 2.8)                                                        | 0.829   | 0.73 (0.31 - 1.73)       | 0.677   | 0.57 (0.26 - 1.23)        | 0.247   | 0.76 (0.38 - 1.51)                                                        | 0.537   | 0.47 (0.25 - 0.92)       | 0.070   | 0.5 (0.26 - 0.95)         | 0.065   |
| Glu        | 3.85 (1.57 - 9.44)                                                       | 0.013*  | 6.36 (2.72 - 14.87)      | <0.001* | 6.09 (2.87 - 12.94)       | <0.001* | 4.4 (2.24 - 8.66)                                                         | <0.001* | 4.21 (2.19 - 8.09)       | <0.001* | 7.58 (4.07 - 14.14)       | <0.001* |
| Gly        | 0.79 (0.32 - 1.93)                                                       | 0.706   | 1.16 (0.49 - 2.72)       | 0.856   | 1.47 (0.69 - 3.16)        | 0.451   | 0.83 (0.42 - 1.65)                                                        | 0.693   | 1.12 (0.58 - 2.17)       | 0.827   | 1.93 (1.02 - 3.66)        | 0.076   |
| His        | 2.63 (1.07 - 6.42)                                                       | 0.080   | 1.51 (0.64 - 3.57)       | 0.540   | 2.21 (1.03 - 4.72)        | 0.092   | 0.9 (0.46 - 1.79)                                                         | 0.847   | 0.98 (0.5 - 1.9)         | 0.975   | 1.87 (0.99 - 3.53)        | 0.091   |
| Ile        | 4.14 (1.69 - 10.12)                                                      | 0.009*  | 2 (0.84 - 4.73)          | 0.260   | 1.79 (0.83 - 3.84)        | 0.232   | 1 (0.5 - 1.97)                                                            | 0.990   | 1.32 (0.68 - 2.58)       | 0.548   | 2.01 (1.06 - 3.8)         | 0.062   |
| Leu        | 3.69 (1.5 - 9.04)                                                        | 0.017*  | 2.12 (0.9 - 5)           | 0.226   | 2.29 (1.07 - 4.89)        | 0.076   | 1.06 (0.53 - 2.1)                                                         | 0.927   | 1.39 (0.72 - 2.7)        | 0.472   | 2.33 (1.23 - 4.4)         | 0.023*  |
| Lys        | 1.43 (0.58 - 3.5)                                                        | 0.563   | 2.5 (1.06 - 5.9)         | 0.123   | 3.78 (1.77 - 8.04)        | 0.004*  | 0.84 (0.42 - 1.66)                                                        | 0.707   | 2.23 (1.15 - 4.32)       | 0.054   | 3.37 (1.79 - 6.33)        | 0.001*  |
| Met        | 2.9 (1.18 - 7.08)                                                        | 0.055   | 1.66 (0.7 - 3.92)        | 0.424   | 1.58 (0.74 - 3.39)        | 0.354   | 1.05 (0.53 - 2.07)                                                        | 0.942   | 1 (0.51 - 1.94)          | 0.998   | 1.4 (0.74 - 2.65)         | 0.361   |
| Orn        | 1.55 (0.63 - 3.82)                                                       | 0.471   | 1.94 (0.82 - 4.57)       | 0.267   | 2.86 (1.34 - 6.12)        | 0.024*  | 0.8 (0.4 - 1.58)                                                          | 0.613   | 1.42 (0.73 - 2.74)       | 0.446   | 2.98 (1.58 - 5.63)        | 0.003*  |
| Phe        | 9.14 (3.77 - 22.14)                                                      | <0.001* | 4.44 (1.89 - 10.42)      | 0.006*  | 3.46 (1.62 - 7.38)        | 0.007*  | 2.52 (1.28 - 4.98)                                                        | 0.020*  | 2.28 (1.18 - 4.4)        | 0.049*  | 3.61 (1.92 - 6.79)        | <0.001* |



|           |                     |         |                    |        |                    |        |                    |         |                    |        |                    |        |
|-----------|---------------------|---------|--------------------|--------|--------------------|--------|--------------------|---------|--------------------|--------|--------------------|--------|
| Pro       | 3.44 (1.4 - 8.42)   | 0.023*  | 2.3 (0.98 - 5.42)  | 0.162  | 1.65 (0.77 - 3.53) | 0.310  | 1.29 (0.65 - 2.56) | 0.558   | 1.11 (0.57 - 2.15) | 0.837  | 1.86 (0.98 - 3.52) | 0.093  |
| Trp       | 6.09 (2.49 - 14.86) | 0.001*  | 2.67 (1.13 - 6.31) | 0.101  | 2.61 (1.22 - 5.57) | 0.038* | 0.98 (0.5 - 1.95)  | 0.982   | 1.02 (0.52 - 1.97) | 0.987  | 1.48 (0.78 - 2.8)  | 0.294  |
| Ser       | 1.68 (0.69 - 4.12)  | 0.375   | 1.18 (0.5 - 2.79)  | 0.830  | 2.47 (1.15 - 5.31) | 0.051  | 1.32 (0.67 - 2.62) | 0.533   | 0.99 (0.51 - 1.92) | 0.997  | 2.2 (1.16 - 4.17)  | 0.033* |
| Thr       | 3.58 (1.46 - 8.81)  | 0.019*  | 2.66 (1.12 - 6.31) | 0.102  | 2.91 (1.36 - 6.21) | 0.022* | 1.45 (0.73 - 2.88) | 0.385   | 1.75 (0.9 - 3.41)  | 0.210  | 2.4 (1.27 - 4.52)  | 0.019* |
| Tyr       | 7.9 (3.25 - 19.21)  | <0.001* | 2.81 (1.19 - 6.62) | 0.077  | 3.27 (1.53 - 6.99) | 0.010* | 1.8 (0.91 - 3.57)  | 0.142   | 1.39 (0.72 - 2.69) | 0.472  | 2.34 (1.24 - 4.42) | 0.022* |
| Val       | 7.24 (2.97 - 17.66) | <0.001* | 3.26 (1.39 - 7.65) | 0.035* | 3.35 (1.57 - 7.15) | 0.009* | 1.77 (0.89 - 3.51) | 0.155   | 1.63 (0.84 - 3.16) | 0.273  | 2.71 (1.44 - 5.11) | 0.007* |
| Cys       | 1.68 (0.69 - 4.13)  | 0.375   | 2.23 (0.95 - 5.24) | 0.183  | 2.79 (1.3 - 5.97)  | 0.029* | 0.78 (0.39 - 1.54) | 0.566   | 1.51 (0.78 - 2.91) | 0.354  | 2.14 (1.13 - 4.06) | 0.040* |
| NEFA_14_0 | 1.39 (0.57 - 3.42)  | 0.575   | 1.15 (0.49 - 2.7)  | 0.864  | 0.78 (0.37 - 1.68) | 0.655  | 1.97 (0.99 - 3.89) | 0.090   | 1.36 (0.7 - 2.63)  | 0.508  | 1.37 (0.72 - 2.58) | 0.400  |
| NEFA_14_1 | 1.16 (0.47 - 2.84)  | 0.816   | 1.3 (0.55 - 3.05)  | 0.731  | 1.17 (0.55 - 2.52) | 0.778  | 3.54 (1.8 - 6.97)  | 0.001*  | 2.51 (1.3 - 4.84)  | 0.026* | 1.95 (1.03 - 3.7)  | 0.071  |
| NEFA_15_0 | 1.18 (0.48 - 2.89)  | 0.792   | 1.02 (0.43 - 2.4)  | 0.975  | 0.57 (0.27 - 1.22) | 0.239  | 1.64 (0.83 - 3.25) | 0.218   | 1.29 (0.67 - 2.5)  | 0.571  | 0.89 (0.47 - 1.68) | 0.762  |
| NEFA_16_0 | 1.86 (0.76 - 4.55)  | 0.283   | 1.9 (0.81 - 4.47)  | 0.278  | 1.13 (0.53 - 2.43) | 0.827  | 2.96 (1.5 - 5.83)  | 0.006*  | 2.34 (1.21 - 4.51) | 0.040* | 2.21 (1.17 - 4.18) | 0.032* |
| NEFA_16_1 | 1.27 (0.52 - 3.1)   | 0.706   | 1.6 (0.68 - 3.77)  | 0.455  | 1.41 (0.66 - 3.01) | 0.512  | 4.27 (2.17 - 8.38) | <0.001* | 3.26 (1.7 - 6.27)  | 0.003* | 3.47 (1.84 - 6.52) | 0.001* |
| NEFA_16_2 | 1.72 (0.7 - 4.21)   | 0.356   | 1.66 (0.71 - 3.9)  | 0.421  | 1.25 (0.58 - 2.68) | 0.681  | 3.19 (1.62 - 6.29) | 0.003*  | 2.24 (1.16 - 4.31) | 0.052  | 2.59 (1.38 - 4.89) | 0.010* |
| NEFA_17_0 | 1.21 (0.5 - 2.98)   | 0.760   | 1.14 (0.48 - 2.68) | 0.872  | 0.87 (0.4 - 1.87)  | 0.807  | 1.97 (1 - 3.89)    | 0.089   | 1.75 (0.9 - 3.39)  | 0.206  | 1.38 (0.73 - 2.61) | 0.390  |
| NEFA_17_1 | 1.71 (0.7 - 4.19)   | 0.357   | 1.46 (0.62 - 3.43) | 0.586  | 1.04 (0.49 - 2.23) | 0.952  | 3.01 (1.53 - 5.93) | 0.005*  | 2.63 (1.37 - 5.07) | 0.018* | 1.94 (1.02 - 3.66) | 0.075  |
| NEFA_17_2 | 1.71 (0.7 - 4.19)   | 0.357   | 0.97 (0.41 - 2.29) | 0.975  | 0.93 (0.43 - 2)    | 0.905  | 1.96 (0.99 - 3.87) | 0.090   | 1.34 (0.7 - 2.6)   | 0.518  | 1.78 (0.94 - 3.37) | 0.121  |
| NEFA_18_0 | 1.53 (0.62 - 3.75)  | 0.483   | 1.08 (0.46 - 2.55) | 0.934  | 0.89 (0.41 - 1.9)  | 0.832  | 2.22 (1.13 - 4.39) | 0.043*  | 1.35 (0.7 - 2.61)  | 0.515  | 1.16 (0.61 - 2.19) | 0.711  |
| NEFA_18_1 | 1.36 (0.56 - 3.34)  | 0.598   | 1.39 (0.59 - 3.28) | 0.637  | 1.35 (0.63 - 2.9)  | 0.559  | 3.15 (1.6 - 6.21)  | 0.004*  | 2.16 (1.12 - 4.16) | 0.062  | 2.59 (1.37 - 4.89) | 0.010* |
| NEFA_18_2 | 1.51 (0.62 - 3.7)   | 0.492   | 1.23 (0.52 - 2.9)  | 0.786  | 1.06 (0.5 - 2.28)  | 0.916  | 2.58 (1.31 - 5.08) | 0.017*  | 1.62 (0.84 - 3.13) | 0.283  | 1.96 (1.03 - 3.7)  | 0.071  |

|           |                    |        |                    |        |                    |        |                     |         |                     |         |                     |         |
|-----------|--------------------|--------|--------------------|--------|--------------------|--------|---------------------|---------|---------------------|---------|---------------------|---------|
| NEFA_18_3 | 1.67 (0.68 - 4.1)  | 0.375  | 1.27 (0.54 - 2.98) | 0.765  | 0.82 (0.38 - 1.75) | 0.714  | 1.88 (0.95 - 3.71)  | 0.116   | 1.29 (0.67 - 2.5)   | 0.571   | 1.54 (0.82 - 2.92)  | 0.238   |
| NEFA_19_1 | 1.02 (0.42 - 2.51) | 0.962  | 0.94 (0.4 - 2.22)  | 0.962  | 0.79 (0.37 - 1.69) | 0.658  | 2.03 (1.03 - 4.01)  | 0.075   | 1.66 (0.86 - 3.21)  | 0.256   | 1.38 (0.73 - 2.62)  | 0.382   |
| NEFA_20_1 | 1.45 (0.59 - 3.57) | 0.542  | 1.1 (0.47 - 2.59)  | 0.913  | 1.36 (0.63 - 2.91) | 0.558  | 3.04 (1.54 - 5.99)  | 0.005*  | 1.85 (0.96 - 3.57)  | 0.159   | 2.81 (1.49 - 5.31)  | 0.005*  |
| NEFA_20_2 | 1.41 (0.58 - 3.46) | 0.563  | 1.6 (0.68 - 3.75)  | 0.455  | 1.78 (0.83 - 3.81) | 0.234  | 3.3 (1.68 - 6.5)    | 0.002*  | 3 (1.56 - 5.77)     | 0.006*  | 3.32 (1.76 - 6.25)  | 0.001*  |
| NEFA_20_3 | 3.78 (1.55 - 9.22) | 0.014* | 3.96 (1.69 - 9.27) | 0.011* | 2.75 (1.28 - 5.87) | 0.030* | 4.66 (2.37 - 9.14)  | <0.001* | 4.43 (2.31 - 8.49)  | <0.001* | 3.58 (1.9 - 6.74)   | 0.001*  |
| NEFA_20_4 | 3.45 (1.41 - 8.44) | 0.022* | 3.52 (1.5 - 8.22)  | 0.024* | 3.09 (1.45 - 6.59) | 0.015* | 5.27 (2.69 - 10.34) | <0.001* | 3.37 (1.75 - 6.46)  | 0.002*  | 5.03 (2.69 - 9.41)  | <0.001* |
| NEFA_20_5 | 2.07 (0.84 - 5.09) | 0.194  | 1.21 (0.52 - 2.86) | 0.805  | 1.55 (0.73 - 3.33) | 0.371  | 1.83 (0.92 - 3.62)  | 0.129   | 1.05 (0.54 - 2.04)  | 0.916   | 2.29 (1.21 - 4.32)  | 0.025*  |
| NEFA_22_3 | 2.04 (0.83 - 4.99) | 0.205  | 3.36 (1.43 - 7.89) | 0.032* | 3.58 (1.67 - 7.67) | 0.006* | 4.12 (2.1 - 8.1)    | <0.001* | 4.72 (2.45 - 9.07)  | <0.001* | 3.96 (2.1 - 7.47)   | <0.001* |
| NEFA_22_4 | 4.15 (1.7 - 10.14) | 0.009* | 4.89 (2.1 - 11.4)  | 0.003* | 3.62 (1.7 - 7.72)  | 0.006* | 6.75 (3.45 - 13.18) | <0.001* | 5.31 (2.78 - 10.15) | <0.001* | 5.47 (2.93 - 10.24) | <0.001* |
| NEFA_22_5 | 2.2 (0.9 - 5.38)   | 0.153  | 2.01 (0.85 - 4.71) | 0.258  | 1.99 (0.93 - 4.26) | 0.148  | 4.15 (2.11 - 8.16)  | <0.001* | 2.75 (1.43 - 5.29)  | 0.013*  | 3.2 (1.7 - 6.03)    | 0.002*  |
| NEFA_22_6 | 1.66 (0.68 - 4.06) | 0.383  | 1.17 (0.5 - 2.75)  | 0.847  | 1.36 (0.64 - 2.93) | 0.558  | 3.23 (1.64 - 6.36)  | 0.003*  | 1.71 (0.88 - 3.3)   | 0.228   | 2.49 (1.32 - 4.7)   | 0.014*  |
| NEFA_24_0 | 2.14 (0.87 - 5.24) | 0.172  | 1.66 (0.7 - 3.92)  | 0.423  | 1.06 (0.5 - 2.28)  | 0.916  | 1.11 (0.56 - 2.19)  | 0.847   | 0.87 (0.45 - 1.69)  | 0.789   | 0.96 (0.51 - 1.81)  | 0.913   |
| NEFA_24_1 | 0.81 (0.33 - 1.98) | 0.733  | 0.56 (0.24 - 1.32) | 0.345  | 0.91 (0.42 - 1.96) | 0.877  | 1.13 (0.57 - 2.23)  | 0.818   | 0.67 (0.35 - 1.3)   | 0.375   | 1.48 (0.78 - 2.81)  | 0.294   |
| NEFA_24_2 | 1.07 (0.44 - 2.64) | 0.904  | 1.55 (0.66 - 3.64) | 0.505  | 1.48 (0.69 - 3.18) | 0.445  | 2.54 (1.29 - 5.02)  | 0.019*  | 1.67 (0.86 - 3.22)  | 0.253   | 1.58 (0.84 - 3)     | 0.211   |
| NEFA_24_4 | 4.29 (1.76 - 10.5) | 0.008* | 3.96 (1.7 - 9.26)  | 0.011* | 3.5 (1.64 - 7.46)  | 0.007* | 4.11 (2.09 - 8.1)   | <0.001* | 4.08 (2.13 - 7.82)  | <0.001* | 3.48 (1.85 - 6.55)  | 0.001*  |
| NEFA_24_5 | 4.07 (1.66 - 9.95) | 0.010* | 2.84 (1.21 - 6.67) | 0.073  | 4.09 (1.92 - 8.73) | 0.002* | 4.63 (2.35 - 9.1)   | <0.001* | 3.97 (2.07 - 7.62)  | <0.001* | 4.57 (2.43 - 8.57)  | <0.001* |
| NEFA_26_0 | 3.92 (1.61 - 9.58) | 0.012* | 2.31 (0.98 - 5.46) | 0.161  | 2.18 (1.02 - 4.67) | 0.096  | 2.54 (1.29 - 5.01)  | 0.019*  | 1.6 (0.82 - 3.1)    | 0.291   | 1.86 (0.98 - 3.52)  | 0.093   |
| NEFA_26_1 | 1.93 (0.79 - 4.72) | 0.252  | 3.08 (1.31 - 7.24) | 0.050  | 2.18 (1.02 - 4.67) | 0.096  | 2.68 (1.36 - 5.28)  | 0.013*  | 2.27 (1.17 - 4.4)   | 0.049*  | 2.07 (1.1 - 3.92)   | 0.049*  |
| NEFA_26_2 | 1.54 (0.63 - 3.77) | 0.478  | 2.52 (1.07 - 5.92) | 0.120  | 1.97 (0.92 - 4.22) | 0.151  | 2.29 (1.16 - 4.52)  | 0.036*  | 2.14 (1.11 - 4.14)  | 0.066   | 1.71 (0.91 - 3.24)  | 0.145   |

|                 |                             |         |                         |         |                            |         |                        |         |                        |         |                        |         |
|-----------------|-----------------------------|---------|-------------------------|---------|----------------------------|---------|------------------------|---------|------------------------|---------|------------------------|---------|
| lyso.PC.a.C14.0 | 28.87<br>(12.07 -<br>69.03) | <0.001* | 13.27 (5.68<br>- 30.97) | <0.001* | 10.99<br>(5.19 -<br>23.27) | <0.001* | 4.46 (2.26<br>- 8.79)  | <0.001* | 5.01 (2.59<br>- 9.67)  | <0.001* | 6.29 (3.35<br>- 11.81) | <0.001* |
| lyso.PC.a.C16.0 | 7.08 (2.9 -<br>17.28)       | <0.001* | 7.51 (3.22 -<br>17.52)  | <0.001* | 5.6 (2.61 -<br>11.98)      | <0.001* | 3.06 (1.55<br>- 6.04)  | 0.005*  | 4.22 (2.2 -<br>8.12)   | <0.001* | 5.84 (3.1 -<br>10.99)  | <0.001* |
| lyso.PC.a.C16.1 | 18.47 (7.61<br>- 44.8)      | <0.001* | 15.39 (6.64<br>- 35.69) | <0.001* | 11.54<br>(5.45 -<br>24.42) | <0.001* | 5.67 (2.87<br>- 11.21) | <0.001* | 6.41 (3.34<br>- 12.29) | <0.001* | 8.57 (4.59<br>- 16.03) | <0.001* |
| lyso.PC.a.C18.0 | 3.33 (1.35 -<br>8.24)       | 0.028*  | 4.9 (2.09 -<br>11.49)   | 0.003*  | 3.47 (1.62<br>- 7.43)      | 0.007*  | 2.05 (1.03<br>- 4.08)  | 0.075   | 2.25 (1.17<br>- 4.36)  | 0.051   | 3.26 (1.73<br>- 6.15)  | 0.001*  |
| lyso.PC.a.C18.1 | 6.21 (2.54 -<br>15.18)      | <0.001* | 3.32 (1.41 -<br>7.84)   | 0.034*  | 2.63 (1.23<br>- 5.64)      | 0.037*  | 2.15 (1.09<br>- 4.27)  | 0.054   | 1.86 (0.96<br>- 3.61)  | 0.159   | 2.81 (1.49<br>- 5.32)  | 0.005*  |
| lyso.PC.a.C18.2 | 3.66 (1.49 -<br>8.98)       | 0.017*  | 1.61 (0.69 -<br>3.79)   | 0.455   | 1.19 (0.56<br>- 2.55)      | 0.753   | 0.97 (0.49<br>- 1.92)  | 0.967   | 0.64 (0.33<br>- 1.24)  | 0.319   | 0.86 (0.46<br>- 1.63)  | 0.705   |
| lyso.PC.a.C18.3 | 6.13 (2.52 -<br>14.94)      | 0.001*  | 2 (0.85 -<br>4.73)      | 0.258   | 2.97 (1.39<br>- 6.37)      | 0.020*  | 1.18 (0.59<br>- 2.33)  | 0.729   | 0.92 (0.48<br>- 1.79)  | 0.873   | 1.96 (1.04<br>- 3.72)  | 0.071   |
| lyso.PC.a.C20.3 | 16.31 (6.78<br>- 39.24)     | <0.001* | 9.37 (4.03 -<br>21.78)  | <0.001* | 8.75 (4.15<br>- 18.46)     | <0.001* | 4.74 (2.41<br>- 9.31)  | <0.001* | 4.33 (2.26<br>- 8.33)  | <0.001* | 4.12 (2.19<br>- 7.73)  | <0.001* |
| lyso.PC.a.C20.4 | 10.73 (4.38<br>- 26.28)     | <0.001* | 8.19 (3.51 -<br>19.12)  | <0.001* | 4.91 (2.31<br>- 10.46)     | 0.001*  | 6.55 (3.31<br>- 12.93) | <0.001* | 4.7 (2.44 -<br>9.03)   | <0.001* | 5.1 (2.72 -<br>9.58)   | <0.001* |
| lyso.PC.a.C20.5 | 2.64 (1.07 -<br>6.54)       | 0.082   | 1.28 (0.54 -<br>3.01)   | 0.745   | 2.53 (1.18<br>- 5.41)      | 0.044*  | 1.35 (0.68<br>- 2.69)  | 0.507   | 1.34 (0.7 -<br>2.6)    | 0.518   | 2.14 (1.13<br>- 4.03)  | 0.040*  |
| lyso.PC.a.C22.6 | 2.83 (1.15 -<br>6.97)       | 0.063   | 1.54 (0.65 -<br>3.64)   | 0.510   | 1.57 (0.73<br>- 3.37)      | 0.365   | 2.04 (1.03<br>- 4.05)  | 0.075   | 1.42 (0.73<br>- 2.75)  | 0.446   | 1.77 (0.93<br>- 3.36)  | 0.123   |
| lyso.PC.e.C16.0 | 4.9 (2 -<br>11.99)          | 0.003*  | 3.96 (1.69 -<br>9.3)    | 0.011*  | 3.34 (1.56<br>- 7.17)      | 0.010*  | 1.86 (0.94<br>- 3.68)  | 0.122   | 2.43 (1.26<br>- 4.69)  | 0.033*  | 2.49 (1.31<br>- 4.72)  | 0.014*  |
| lyso.PC.e.C18.0 | 0.76 (0.31 -<br>1.86)       | 0.650   | 1.43 (0.61 -<br>3.37)   | 0.617   | 1.41 (0.66<br>- 3.04)      | 0.507   | 0.92 (0.46<br>- 1.83)  | 0.878   | 1.56 (0.8 -<br>3.01)   | 0.321   | 1.3 (0.68 -<br>2.46)   | 0.492   |
| lyso.PC.e.C18.1 | 4.29 (1.75 -<br>10.52)      | 0.008*  | 2.23 (0.95 -<br>5.25)   | 0.183   | 2.69 (1.26<br>- 5.76)      | 0.033*  | 2.39 (1.21<br>- 4.74)  | 0.031*  | 2.73 (1.41<br>- 5.27)  | 0.014*  | 3 (1.59 -<br>5.66)     | 0.003*  |
| PC.aa.C30.0     | 6.36 (2.6 -<br>15.55)       | <0.001* | 2.01 (0.85 -<br>4.75)   | 0.258   | 1.94 (0.91<br>- 4.17)      | 0.164   | 2.02 (1.02<br>- 4)     | 0.079   | 1.25 (0.64<br>- 2.43)  | 0.624   | 1.43 (0.75<br>- 2.71)  | 0.343   |
| PC.aa.C30.3     | 2.15 (0.88 -<br>5.27)       | 0.167   | 2.57 (1.1 -<br>6.04)    | 0.110   | 1.81 (0.84<br>- 3.91)      | 0.230   | 2.82 (1.43<br>- 5.56)  | 0.008*  | 2.06 (1.07<br>- 3.97)  | 0.081   | 1.99 (1.05<br>- 3.79)  | 0.066   |
| PC.aa.C32.0     | 7.1 (2.92 -<br>17.29)       | <0.001* | 3 (1.28 -<br>7.04)      | 0.056   | 2.8 (1.3 -<br>6.02)        | 0.029*  | 4.7 (2.39 -<br>9.25)   | <0.001* | 2.77 (1.44<br>- 5.34)  | 0.013*  | 3.4 (1.8 -<br>6.42)    | 0.001*  |
| PC.aa.C32.1     | 14.68 (6.09<br>- 35.36)     | <0.001* | 5.41 (2.31 -<br>12.69)  | 0.001*  | 5.93 (2.79<br>- 12.6)      | <0.001* | 5.03 (2.56<br>- 9.89)  | <0.001* | 4.1 (2.13 -<br>7.9)    | <0.001* | 4.39 (2.33<br>- 8.24)  | <0.001* |

|             |                      |         |                     |         |                     |         |                     |         |                    |         |                    |         |
|-------------|----------------------|---------|---------------------|---------|---------------------|---------|---------------------|---------|--------------------|---------|--------------------|---------|
| PC.aa.C32.2 | 8.35 (3.43 - 20.33)  | <0.001* | 2.96 (1.26 - 6.94)  | 0.059   | 3.54 (1.66 - 7.57)  | 0.006*  | 2.38 (1.2 - 4.72)   | 0.031*  | 2.14 (1.11 - 4.14) | 0.065   | 2.04 (1.08 - 3.86) | 0.056   |
| PC.aa.C32.3 | 2.85 (1.17 - 6.98)   | 0.059   | 1.98 (0.84 - 4.67)  | 0.260   | 1.91 (0.89 - 4.11)  | 0.175   | 3.17 (1.61 - 6.25)  | 0.004*  | 2.18 (1.13 - 4.21) | 0.059   | 2.79 (1.48 - 5.27) | 0.005*  |
| PC.aa.C34.1 | 6.47 (2.65 - 15.81)  | <0.001* | 3.78 (1.61 - 8.87)  | 0.015*  | 4.34 (2.02 - 9.29)  | 0.002*  | 4.22 (2.14 - 8.32)  | <0.001* | 3.08 (1.6 - 5.94)  | 0.005*  | 3.96 (2.1 - 7.49)  | <0.001* |
| PC.aa.C34.2 | 3.92 (1.59 - 9.66)   | 0.012*  | 2 (0.85 - 4.7)      | 0.258   | 2.25 (1.04 - 4.84)  | 0.088   | 2.36 (1.19 - 4.69)  | 0.033*  | 1.63 (0.84 - 3.16) | 0.273   | 2.01 (1.06 - 3.82) | 0.064   |
| PC.aa.C34.3 | 6.59 (2.7 - 16.08)   | <0.001* | 2.43 (1.03 - 5.73)  | 0.136   | 2.97 (1.38 - 6.38)  | 0.020*  | 2.77 (1.4 - 5.48)   | 0.010*  | 2.29 (1.18 - 4.42) | 0.047*  | 2.65 (1.4 - 5.02)  | 0.009*  |
| PC.aa.C34.4 | 16.16 (6.73 - 38.81) | <0.001* | 4.95 (2.11 - 11.62) | 0.003*  | 4.92 (2.3 - 10.5)   | 0.001*  | 4.61 (2.35 - 9.05)  | <0.001* | 3.42 (1.77 - 6.59) | 0.002*  | 3.1 (1.64 - 5.86)  | 0.002*  |
| PC.aa.C34.5 | 3.95 (1.62 - 9.64)   | 0.011*  | 1.42 (0.6 - 3.36)   | 0.617   | 1.77 (0.83 - 3.8)   | 0.234   | 1.9 (0.96 - 3.74)   | 0.110   | 1.2 (0.62 - 2.33)  | 0.699   | 1.61 (0.85 - 3.04) | 0.199   |
| PC.aa.C36.0 | 1.41 (0.57 - 3.45)   | 0.563   | 1.51 (0.64 - 3.55)  | 0.540   | 1.37 (0.64 - 2.94)  | 0.558   | 1.78 (0.9 - 3.52)   | 0.147   | 1.52 (0.79 - 2.95) | 0.343   | 1.56 (0.82 - 2.95) | 0.233   |
| PC.aa.C36.1 | 7.43 (3.06 - 18.05)  | <0.001* | 2.79 (1.18 - 6.58)  | 0.079   | 3.45 (1.61 - 7.41)  | 0.007*  | 3.31 (1.68 - 6.53)  | 0.002*  | 1.73 (0.89 - 3.36) | 0.214   | 3.04 (1.6 - 5.74)  | 0.003*  |
| PC.aa.C36.2 | 3.64 (1.49 - 8.9)    | 0.017*  | 1.75 (0.74 - 4.13)  | 0.363   | 2.03 (0.95 - 4.36)  | 0.137   | 2.06 (1.04 - 4.09)  | 0.070   | 1.29 (0.67 - 2.51) | 0.571   | 1.65 (0.87 - 3.12) | 0.179   |
| PC.aa.C36.3 | 8 (3.29 - 19.49)     | <0.001* | 4.08 (1.74 - 9.58)  | 0.010*  | 5.04 (2.36 - 10.76) | <0.001* | 3.7 (1.88 - 7.31)   | 0.001*  | 3.15 (1.63 - 6.08) | 0.004*  | 3.11 (1.64 - 5.87) | 0.002*  |
| PC.aa.C36.4 | 9.43 (3.9 - 22.82)   | <0.001* | 5.98 (2.56 - 13.97) | 0.001*  | 5.33 (2.49 - 11.43) | <0.001* | 6.77 (3.46 - 13.22) | <0.001* | 5.33 (2.78 - 10.2) | <0.001* | 4.76 (2.52 - 8.98) | <0.001* |
| PC.aa.C36.5 | 5.95 (2.45 - 14.48)  | 0.001*  | 1.62 (0.69 - 3.83)  | 0.451   | 3.28 (1.54 - 7.02)  | 0.010*  | 2.3 (1.17 - 4.54)   | 0.036*  | 1.74 (0.9 - 3.38)  | 0.210   | 2.82 (1.49 - 5.32) | 0.005*  |
| PC.aa.C36.6 | 5.61 (2.3 - 13.69)   | 0.001*  | 1.98 (0.84 - 4.68)  | 0.260   | 3.52 (1.65 - 7.51)  | 0.007*  | 1.88 (0.95 - 3.71)  | 0.116   | 1.69 (0.87 - 3.27) | 0.243   | 2.39 (1.26 - 4.51) | 0.020*  |
| PC.aa.C38.0 | 1.66 (0.68 - 4.06)   | 0.383   | 1.04 (0.44 - 2.47)  | 0.975   | 1.52 (0.71 - 3.26)  | 0.410   | 1.86 (0.94 - 3.68)  | 0.120   | 1.29 (0.66 - 2.51) | 0.573   | 2.2 (1.16 - 4.17)  | 0.033*  |
| PC.aa.C38.2 | 5.2 (2.13 - 12.69)   | 0.002*  | 3.13 (1.33 - 7.36)  | 0.045*  | 3.56 (1.67 - 7.62)  | 0.006*  | 2.46 (1.24 - 4.86)  | 0.024*  | 2.56 (1.33 - 4.95) | 0.022*  | 2.59 (1.37 - 4.89) | 0.010*  |
| PC.aa.C38.3 | 12.46 (5.17 - 30.03) | <0.001* | 8.75 (3.75 - 20.39) | <0.001* | 9.78 (4.62 - 20.67) | <0.001* | 5.54 (2.83 - 10.84) | <0.001* | 4.96 (2.58 - 9.53) | <0.001* | 5.1 (2.71 - 9.57)  | <0.001* |
| PC.aa.C38.4 | 7.18 (2.96 - 17.43)  | <0.001* | 6.75 (2.89 - 15.73) | <0.001* | 6.01 (2.81 - 12.84) | <0.001* | 7.06 (3.62 - 13.79) | <0.001* | 5.09 (2.66 - 9.76) | <0.001* | 4.94 (2.62 - 9.32) | <0.001* |
| PC.aa.C38.5 | 3.7 (1.52 - 9.03)    | 0.016*  | 3.09 (1.32 - 7.24)  | 0.048*  | 4.32 (2.02 - 9.26)  | 0.002*  | 3.34 (1.69 - 6.57)  | 0.002*  | 2.81 (1.46 - 5.42) | 0.011*  | 3.3 (1.74 - 6.23)  | 0.001*  |

|              |                     |         |                     |         |                     |         |                     |         |                    |         |                    |         |
|--------------|---------------------|---------|---------------------|---------|---------------------|---------|---------------------|---------|--------------------|---------|--------------------|---------|
| PC.aa.C38.6  | 1.73 (0.7 - 4.24)   | 0.353   | 1.41 (0.6 - 3.32)   | 0.624   | 2.19 (1.02 - 4.71)  | 0.096   | 2.22 (1.12 - 4.38)  | 0.043*  | 1.83 (0.94 - 3.53) | 0.168   | 2.3 (1.21 - 4.37)  | 0.025*  |
| PC.aa.C40.0  | 2.22 (0.91 - 5.44)  | 0.148   | 1.17 (0.49 - 2.76)  | 0.848   | 1.43 (0.67 - 3.07)  | 0.496   | 2.2 (1.11 - 4.34)   | 0.046*  | 1.26 (0.65 - 2.45) | 0.612   | 1.61 (0.85 - 3.05) | 0.199   |
| PC.aa.C40.1  | 1.87 (0.76 - 4.58)  | 0.282   | 2.07 (0.87 - 4.88)  | 0.242   | 1.36 (0.63 - 2.92)  | 0.558   | 2.3 (1.16 - 4.55)   | 0.036   | 1.53 (0.79 - 2.97) | 0.338   | 1.21 (0.64 - 2.3)  | 0.617   |
| PC.aa.C40.2  | 2.87 (1.17 - 7.04)  | 0.059   | 1.06 (0.45 - 2.49)  | 0.962   | 1.95 (0.91 - 4.19)  | 0.163   | 2.15 (1.08 - 4.25)  | 0.054   | 1.09 (0.56 - 2.1)  | 0.873   | 1.35 (0.71 - 2.57) | 0.416   |
| PC.aa.C40.3  | 3.63 (1.49 - 8.87)  | 0.017*  | 1.93 (0.82 - 4.55)  | 0.272   | 2.47 (1.15 - 5.32)  | 0.051   | 2.85 (1.44 - 5.61)  | 0.008*  | 2.21 (1.14 - 4.27) | 0.056   | 1.67 (0.88 - 3.16) | 0.171   |
| PC.aa.C40.4  | 8.37 (3.45 - 20.29) | <0.001* | 6.82 (2.93 - 15.91) | <0.001* | 6.91 (3.26 - 14.65) | <0.001* | 6.63 (3.39 - 12.96) | <0.001* | 4.93 (2.57 - 9.45) | <0.001* | 4.03 (2.14 - 7.57) | <0.001* |
| PC.aa.C40.5  | 2.78 (1.14 - 6.8)   | 0.064   | 3.39 (1.45 - 7.96)  | 0.030*  | 3.8 (1.77 - 8.13)   | 0.004*  | 2.98 (1.51 - 5.86)  | 0.005*  | 2.32 (1.2 - 4.47)  | 0.042*  | 2.35 (1.24 - 4.46) | 0.022*  |
| PC.aa.C40.6  | 3.73 (1.53 - 9.09)  | 0.015*  | 2.39 (1.01 - 5.61)  | 0.148   | 3.68 (1.72 - 7.86)  | 0.005*  | 3.83 (1.95 - 7.54)  | 0.001*  | 2.4 (1.25 - 4.63)  | 0.035*  | 3.34 (1.77 - 6.31) | 0.001*  |
| PC.aa.C42.0  | 1.58 (0.64 - 3.88)  | 0.441   | 1.2 (0.51 - 2.84)   | 0.821   | 2.11 (0.99 - 4.51)  | 0.111   | 1.85 (0.94 - 3.67)  | 0.121   | 1.31 (0.67 - 2.55) | 0.559   | 1.81 (0.96 - 3.41) | 0.109   |
| PC.aa.C42.5  | 1.15 (0.46 - 2.85)  | 0.824   | 0.81 (0.34 - 1.91)  | 0.781   | 1.14 (0.53 - 2.45)  | 0.812   | 1.62 (0.81 - 3.23)  | 0.238   | 1.12 (0.58 - 2.16) | 0.837   | 1.67 (0.88 - 3.15) | 0.169   |
| PC.aa.C43.6  | 1.22 (0.5 - 3)      | 0.750   | 1.46 (0.62 - 3.44)  | 0.588   | 1.71 (0.8 - 3.68)   | 0.265   | 1.61 (0.81 - 3.19)  | 0.238   | 1.58 (0.81 - 3.06) | 0.308   | 1.74 (0.92 - 3.29) | 0.136   |
| PC.aa.C44.12 | 2.47 (1.01 - 6.05)  | 0.099   | 2.37 (1.01 - 5.59)  | 0.148   | 3.06 (1.42 - 6.6)   | 0.017*  | 2.89 (1.46 - 5.69)  | 0.007*  | 2.25 (1.16 - 4.35) | 0.052   | 2.83 (1.49 - 5.36) | 0.005*  |
| PC.ae.C30.0  | 3.6 (1.47 - 8.81)   | 0.018*  | 1.83 (0.78 - 4.3)   | 0.319   | 1.76 (0.82 - 3.77)  | 0.239   | 1.73 (0.88 - 3.43)  | 0.171   | 1.21 (0.62 - 2.34) | 0.697   | 1.12 (0.59 - 2.12) | 0.769   |
| PC.ae.C32.0  | 3.59 (1.47 - 8.8)   | 0.018*  | 2.3 (0.98 - 5.41)   | 0.162   | 2.41 (1.13 - 5.18)  | 0.059   | 2.4 (1.21 - 4.75)   | 0.030*  | 1.66 (0.86 - 3.22) | 0.256   | 1.91 (1.01 - 3.62) | 0.080   |
| PC.ae.C32.1  | 2.57 (1.05 - 6.28)  | 0.086   | 2.24 (0.95 - 5.27)  | 0.182   | 1.42 (0.66 - 3.07)  | 0.507   | 2.32 (1.18 - 4.59)  | 0.034*  | 1.67 (0.86 - 3.23) | 0.253   | 1.6 (0.84 - 3.04)  | 0.209   |
| PC.ae.C32.2  | 1.36 (0.55 - 3.33)  | 0.606   | 1.02 (0.43 - 2.4)   | 0.975   | 0.79 (0.37 - 1.7)   | 0.671   | 1.43 (0.72 - 2.84)  | 0.396   | 0.95 (0.49 - 1.83) | 0.912   | 1.12 (0.59 - 2.12) | 0.769   |
| PC.ae.C34.0  | 2.4 (0.98 - 5.88)   | 0.114   | 1.89 (0.8 - 4.44)   | 0.284   | 1.61 (0.75 - 3.46)  | 0.333   | 1.72 (0.87 - 3.41)  | 0.178   | 1.3 (0.67 - 2.52)  | 0.566   | 1.17 (0.62 - 2.22) | 0.688   |
| PC.ae.C34.1  | 3.1 (1.26 - 7.61)   | 0.040*  | 1.91 (0.81 - 4.5)   | 0.278   | 2.24 (1.04 - 4.83)  | 0.088   | 2.06 (1.04 - 4.08)  | 0.071   | 1.46 (0.76 - 2.83) | 0.399   | 1.85 (0.97 - 3.51) | 0.098   |
| PC.ae.C34.2  | 1.42 (0.58 - 3.5)   | 0.563   | 1.03 (0.43 - 2.43)  | 0.975   | 1.2 (0.56 - 2.59)   | 0.742   | 1.27 (0.64 - 2.52)  | 0.587   | 0.88 (0.45 - 1.71) | 0.804   | 1.12 (0.59 - 2.13) | 0.769   |

|             |                     |        |                    |        |                     |        |                    |         |                    |        |                    |        |
|-------------|---------------------|--------|--------------------|--------|---------------------|--------|--------------------|---------|--------------------|--------|--------------------|--------|
| PC.ae.C34.3 | 1.18 (0.48 - 2.91)  | 0.790  | 0.97 (0.41 - 2.29) | 0.975  | 0.72 (0.34 - 1.56)  | 0.544  | 1.16 (0.59 - 2.3)  | 0.755   | 0.72 (0.37 - 1.39) | 0.464  | 0.94 (0.49 - 1.78) | 0.863  |
| PC.ae.C34.4 | 1.21 (0.49 - 2.97)  | 0.765  | 0.79 (0.34 - 1.87) | 0.770  | 1.13 (0.52 - 2.42)  | 0.833  | 0.99 (0.5 - 1.95)  | 0.982   | 0.76 (0.39 - 1.46) | 0.548  | 1.11 (0.59 - 2.11) | 0.778  |
| PC.ae.C36.0 | 1.12 (0.46 - 2.75)  | 0.847  | 1.24 (0.53 - 2.91) | 0.781  | 1.24 (0.58 - 2.67)  | 0.691  | 1.91 (0.96 - 3.78) | 0.108   | 1.55 (0.8 - 3)     | 0.321  | 1.84 (0.97 - 3.48) | 0.100  |
| PC.ae.C36.1 | 1.96 (0.8 - 4.83)   | 0.238  | 1.86 (0.79 - 4.4)  | 0.299  | 2.54 (1.19 - 5.43)  | 0.044  | 2.26 (1.14 - 4.47) | 0.041*  | 1.62 (0.83 - 3.13) | 0.283  | 1.99 (1.05 - 3.77) | 0.064  |
| PC.ae.C36.2 | 0.93 (0.38 - 2.3)   | 0.904  | 0.75 (0.32 - 1.77) | 0.706  | 1.09 (0.51 - 2.34)  | 0.883  | 0.93 (0.47 - 1.85) | 0.899   | 0.74 (0.38 - 1.43) | 0.515  | 0.8 (0.42 - 1.52)  | 0.555  |
| PC.ae.C36.3 | 2.6 (1.06 - 6.38)   | 0.082  | 1.75 (0.74 - 4.15) | 0.363  | 2.57 (1.19 - 5.53)  | 0.044* | 1.93 (0.97 - 3.81) | 0.101   | 1.55 (0.8 - 3)     | 0.334  | 2.11 (1.11 - 4.01) | 0.047* |
| PC.ae.C36.4 | 4.89 (2.01 - 11.91) | 0.003* | 5.38 (2.29 - 12.6) | 0.001* | 4.32 (2.02 - 9.24)  | 0.002* | 4.72 (2.41 - 9.26) | <0.001* | 3.81 (1.98 - 7.35) | 0.001* | 3.59 (1.9 - 6.78)  | 0.001* |
| PC.ae.C36.5 | 3.32 (1.36 - 8.11)  | 0.027* | 2.58 (1.09 - 6.08) | 0.110  | 2.35 (1.09 - 5.05)  | 0.067  | 3.75 (1.91 - 7.38) | 0.001*  | 2.63 (1.36 - 5.08) | 0.019* | 2.94 (1.55 - 5.56) | 0.004* |
| PC.ae.C38.0 | 1.88 (0.77 - 4.61)  | 0.273  | 1.02 (0.43 - 2.4)  | 0.975  | 1.76 (0.82 - 3.79)  | 0.240  | 1.65 (0.84 - 3.27) | 0.211   | 1.54 (0.79 - 2.97) | 0.337  | 1.9 (1 - 3.61)     | 0.083  |
| PC.ae.C38.2 | 2.09 (0.85 - 5.14)  | 0.188  | 1.75 (0.74 - 4.12) | 0.363  | 1.35 (0.63 - 2.89)  | 0.563  | 1.25 (0.63 - 2.48) | 0.618   | 0.99 (0.51 - 1.91) | 0.987  | 0.95 (0.5 - 1.8)   | 0.897  |
| PC.ae.C38.3 | 4.14 (1.7 - 10.11)  | 0.009* | 3.82 (1.62 - 8.97) | 0.015* | 4.73 (2.21 - 10.12) | 0.001* | 2.94 (1.49 - 5.8)  | 0.006*  | 2.82 (1.46 - 5.44) | 0.012* | 2.38 (1.25 - 4.52) | 0.021* |
| PC.ae.C38.4 | 2.9 (1.19 - 7.1)    | 0.055  | 3.29 (1.4 - 7.72)  | 0.035* | 2.91 (1.35 - 6.27)  | 0.023* | 2.98 (1.51 - 5.87) | 0.005*  | 2.24 (1.16 - 4.32) | 0.052  | 2.22 (1.17 - 4.23) | 0.033* |
| PC.ae.C38.5 | 2.7 (1.11 - 6.61)   | 0.072  | 2.62 (1.11 - 6.17) | 0.104  | 2.67 (1.24 - 5.74)  | 0.036* | 3.35 (1.7 - 6.59)  | 0.002*  | 2.63 (1.36 - 5.08) | 0.019* | 3.1 (1.64 - 5.87)  | 0.002* |
| PC.ae.C38.6 | 2.46 (1 - 6.01)     | 0.100  | 1.77 (0.75 - 4.19) | 0.356  | 2.4 (1.12 - 5.17)   | 0.060  | 2.93 (1.49 - 5.77) | 0.006*  | 2.01 (1.04 - 3.9)  | 0.097  | 2.85 (1.51 - 5.41) | 0.005* |
| PC.ae.C40.0 | 2.47 (1.01 - 6.05)  | 0.099  | 1.3 (0.55 - 3.07)  | 0.731  | 2.17 (1.01 - 4.67)  | 0.100  | 2.73 (1.38 - 5.38) | 0.011*  | 2.17 (1.13 - 4.2)  | 0.060  | 1.86 (0.98 - 3.54) | 0.093  |
| PC.ae.C40.1 | 2.65 (1.08 - 6.48)  | 0.077  | 1.25 (0.53 - 2.96) | 0.779  | 2.07 (0.96 - 4.44)  | 0.124  | 1.87 (0.95 - 3.7)  | 0.116   | 1.26 (0.65 - 2.44) | 0.617  | 1.59 (0.84 - 3.02) | 0.209  |
| PC.ae.C40.2 | 1.13 (0.46 - 2.77)  | 0.847  | 0.71 (0.3 - 1.68)  | 0.624  | 1.81 (0.84 - 3.87)  | 0.226  | 1.28 (0.65 - 2.55) | 0.566   | 0.92 (0.47 - 1.8)  | 0.873  | 1.34 (0.71 - 2.54) | 0.427  |
| PC.ae.C40.3 | 2.8 (1.14 - 6.84)   | 0.063  | 2.38 (1.01 - 5.6)  | 0.148  | 2.41 (1.12 - 5.17)  | 0.060  | 2.37 (1.2 - 4.68)  | 0.031*  | 1.64 (0.85 - 3.19) | 0.268  | 1.42 (0.75 - 2.7)  | 0.351  |
| PC.ae.C40.4 | 2.61 (1.06 - 6.38)  | 0.082  | 3.33 (1.42 - 7.83) | 0.034* | 2.55 (1.18 - 5.5)   | 0.044* | 2.22 (1.12 - 4.38) | 0.043*  | 1.45 (0.75 - 2.81) | 0.415  | 1.54 (0.81 - 2.93) | 0.245  |

|             |                     |         |                    |         |                     |         |                     |         |                    |         |                     |         |
|-------------|---------------------|---------|--------------------|---------|---------------------|---------|---------------------|---------|--------------------|---------|---------------------|---------|
| PC.ae.C40.5 | 1.49 (0.61 - 3.65)  | 0.510   | 1.7 (0.72 - 4)     | 0.396   | 2.22 (1.03 - 4.8)   | 0.093   | 2.27 (1.15 - 4.48)  | 0.039*  | 1.51 (0.78 - 2.92) | 0.354   | 2.08 (1.09 - 3.97)  | 0.051   |
| PC.ae.C40.6 | 1.06 (0.43 - 2.6)   | 0.924   | 0.98 (0.41 - 2.3)  | 0.975   | 1.69 (0.79 - 3.63)  | 0.281   | 1.47 (0.74 - 2.9)   | 0.367   | 1.12 (0.58 - 2.17) | 0.827   | 1.66 (0.88 - 3.15)  | 0.171   |
| PC.ae.C42.1 | 2.66 (1.09 - 6.51)  | 0.077   | 2.51 (1.06 - 5.9)  | 0.121   | 2.41 (1.13 - 5.17)  | 0.059   | 3.43 (1.74 - 6.76)  | 0.002*  | 3.61 (1.87 - 6.95) | 0.001*  | 1.76 (0.93 - 3.34)  | 0.125   |
| PC.ae.C42.3 | 0.89 (0.36 - 2.19)  | 0.847   | 0.57 (0.24 - 1.36) | 0.368   | 1.28 (0.6 - 2.75)   | 0.655   | 0.96 (0.49 - 1.91)  | 0.961   | 0.57 (0.29 - 1.1)  | 0.206   | 1 (0.53 - 1.89)     | 0.995   |
| PC.ae.C42.4 | 2.68 (1.09 - 6.56)  | 0.076   | 2.1 (0.89 - 4.96)  | 0.227   | 2.75 (1.28 - 5.9)   | 0.030*  | 1.71 (0.86 - 3.38)  | 0.180   | 1.48 (0.76 - 2.86) | 0.381   | 1.64 (0.87 - 3.11)  | 0.182   |
| PC.ae.C42.5 | 2.02 (0.82 - 4.95)  | 0.211   | 2.12 (0.9 - 5)     | 0.222   | 2.77 (1.29 - 5.97)  | 0.030*  | 2.29 (1.16 - 4.52)  | 0.036*  | 1.6 (0.83 - 3.09)  | 0.291   | 1.92 (1.01 - 3.66)  | 0.079   |
| PC.ae.C42.6 | 1.42 (0.58 - 3.47)  | 0.563   | 1.23 (0.52 - 2.9)  | 0.795   | 1.7 (0.79 - 3.65)   | 0.275   | 1.54 (0.78 - 3.05)  | 0.293   | 1.15 (0.59 - 2.23) | 0.793   | 1.62 (0.85 - 3.06)  | 0.199   |
| SM.a.C30.1  | 4.05 (1.65 - 9.94)  | 0.010*  | 3 (1.27 - 7.06)    | 0.057   | 3.01 (1.41 - 6.44)  | 0.018*  | 3.33 (1.68 - 6.58)  | 0.002*  | 2.21 (1.14 - 4.27) | 0.056   | 2.26 (1.2 - 4.27)   | 0.028*  |
| SM.a.C32.1  | 3.41 (1.39 - 8.38)  | 0.024*  | 2.58 (1.1 - 6.06)  | 0.110   | 2.92 (1.36 - 6.27)  | 0.023*  | 3.1 (1.56 - 6.13)   | 0.005*  | 2.67 (1.38 - 5.14) | 0.017*  | 2.16 (1.14 - 4.1)   | 0.040*  |
| SM.a.C32.2  | 8.42 (3.46 - 20.46) | <0.001* | 6.53 (2.8 - 15.2)  | <0.001* | 7.89 (3.72 - 16.74) | <0.001* | 7.84 (4.01 - 15.33) | <0.001* | 5.6 (2.93 - 10.7)  | <0.001* | 6.24 (3.33 - 11.69) | <0.001* |
| SM.a.C33.1  | 1.37 (0.55 - 3.39)  | 0.598   | 1.33 (0.57 - 3.13) | 0.706   | 1.52 (0.71 - 3.27)  | 0.410   | 1.85 (0.93 - 3.69)  | 0.123   | 1.51 (0.78 - 2.91) | 0.354   | 1.32 (0.69 - 2.51)  | 0.459   |
| SM.a.C34.1  | 1.52 (0.62 - 3.73)  | 0.491   | 1.7 (0.72 - 4)     | 0.396   | 1.89 (0.87 - 4.09)  | 0.194   | 2.62 (1.32 - 5.17)  | 0.015*  | 1.9 (0.98 - 3.67)  | 0.135   | 1.77 (0.93 - 3.38)  | 0.126   |
| SM.a.C34.2  | 5.45 (2.24 - 13.29) | 0.001*  | 4.7 (2.01 - 10.98) | 0.004*  | 5.17 (2.42 - 11.07) | <0.001* | 8.17 (4.19 - 15.93) | <0.001* | 4.86 (2.54 - 9.31) | <0.001* | 5.14 (2.73 - 9.69)  | <0.001* |
| SM.a.C35.0  | 1.03 (0.41 - 2.58)  | 0.962   | 1.1 (0.46 - 2.63)  | 0.913   | 2.03 (0.93 - 4.42)  | 0.146   | 2.18 (1.08 - 4.38)  | 0.055   | 1.64 (0.83 - 3.25) | 0.283   | 2.35 (1.21 - 4.54)  | 0.026*  |
| SM.a.C35.1  | 0.57 (0.23 - 1.4)   | 0.335   | 0.9 (0.38 - 2.13)  | 0.913   | 1 (0.46 - 2.15)     | 0.996   | 1.55 (0.78 - 3.08)  | 0.287   | 1.53 (0.79 - 2.96) | 0.338   | 1.42 (0.74 - 2.69)  | 0.352   |
| SM.a.C36.1  | 2.8 (1.14 - 6.86)   | 0.063   | 2.46 (1.05 - 5.79) | 0.127   | 2.39 (1.11 - 5.15)  | 0.063   | 4.35 (2.21 - 8.57)  | <0.001* | 3.21 (1.67 - 6.18) | 0.003*  | 4.22 (2.23 - 7.98)  | <0.001* |
| SM.a.C36.2  | 2.48 (1.01 - 6.07)  | 0.099   | 2.64 (1.12 - 6.19) | 0.102   | 2.7 (1.25 - 5.81)   | 0.035*  | 5.75 (2.94 - 11.25) | <0.001* | 4.04 (2.1 - 7.76)  | <0.001* | 4.89 (2.59 - 9.23)  | <0.001* |
| SM.a.C36.3  | 3.3 (1.35 - 8.07)   | 0.027*  | 2.2 (0.94 - 5.16)  | 0.191   | 2.5 (1.16 - 5.4)    | 0.050   | 5.01 (2.56 - 9.83)  | <0.001* | 3.66 (1.91 - 7.03) | 0.001*  | 4.06 (2.14 - 7.67)  | <0.001* |
| SM.a.C37.1  | 2.73 (1.11 - 6.73)  | 0.072   | 2.05 (0.87 - 4.84) | 0.243   | 3.12 (1.46 - 6.65)  | 0.014*  | 2.23 (1.12 - 4.42)  | 0.043*  | 2.5 (1.3 - 4.83)   | 0.027*  | 3.06 (1.62 - 5.76)  | 0.002*  |

|            |                     |        |                     |        |                     |        |                     |         |                    |         |                    |         |
|------------|---------------------|--------|---------------------|--------|---------------------|--------|---------------------|---------|--------------------|---------|--------------------|---------|
| SM.a.C38.2 | 2.68 (1.08 - 6.62)  | 0.077  | 2.37 (1.01 - 5.57)  | 0.148  | 2.36 (1.1 - 5.08)   | 0.066  | 2.33 (1.17 - 4.64)  | 0.036*  | 2.07 (1.07 - 3.99) | 0.081   | 2.73 (1.44 - 5.18) | 0.007*  |
| SM.a.C38.3 | 2.6 (1.05 - 6.41)   | 0.085  | 1.95 (0.83 - 4.59)  | 0.267  | 1.59 (0.74 - 3.43)  | 0.351  | 2.36 (1.19 - 4.68)  | 0.033*  | 2.11 (1.09 - 4.08) | 0.070   | 2.26 (1.19 - 4.29) | 0.028*  |
| SM.a.C39.1 | 2.41 (0.97 - 5.95)  | 0.114  | 1.95 (0.83 - 4.59)  | 0.267  | 2.65 (1.24 - 5.67)  | 0.036* | 2.38 (1.2 - 4.73)   | 0.031*  | 1.94 (1 - 3.74)    | 0.120   | 1.92 (1.02 - 3.63) | 0.078   |
| SM.a.C39.2 | 1.12 (0.45 - 2.75)  | 0.851  | 0.75 (0.32 - 1.77)  | 0.706  | 1.81 (0.84 - 3.87)  | 0.228  | 1.67 (0.84 - 3.32)  | 0.207   | 1.32 (0.68 - 2.55) | 0.550   | 1.99 (1.05 - 3.77) | 0.064   |
| SM.a.C40.2 | 3.48 (1.42 - 8.54)  | 0.022* | 2.83 (1.21 - 6.66)  | 0.074  | 3.29 (1.53 - 7.06)  | 0.010* | 3.52 (1.78 - 6.95)  | 0.002*  | 2.37 (1.23 - 4.58) | 0.037*  | 2.8 (1.48 - 5.31)  | 0.005*  |
| SM.a.C40.5 | 5.5 (2.26 - 13.39)  | 0.001* | 2.01 (0.85 - 4.74)  | 0.258  | 4.79 (2.26 - 10.19) | 0.001* | 3.02 (1.53 - 5.95)  | 0.005*  | 2.06 (1.07 - 4)    | 0.081   | 4.06 (2.16 - 7.62) | <0.001* |
| SM.a.C41.1 | 4.17 (1.69 - 10.29) | 0.009* | 2 (0.85 - 4.7)      | 0.258  | 2.62 (1.22 - 5.61)  | 0.038  | 3.14 (1.58 - 6.24)  | 0.004*  | 2.57 (1.33 - 4.95) | 0.022*  | 3.01 (1.59 - 5.69) | 0.003*  |
| SM.a.C41.2 | 1.91 (0.77 - 4.71)  | 0.266  | 1.1 (0.47 - 2.59)   | 0.913  | 2.69 (1.26 - 5.76)  | 0.033* | 2.38 (1.2 - 4.73)   | 0.031*  | 1.77 (0.92 - 3.42) | 0.194   | 2.51 (1.33 - 4.74) | 0.013*  |
| SM.a.C42.1 | 2.28 (0.93 - 5.59)  | 0.135  | 1.42 (0.6 - 3.34)   | 0.617  | 2.07 (0.97 - 4.43)  | 0.122  | 2.83 (1.43 - 5.59)  | 0.008*  | 1.81 (0.94 - 3.5)  | 0.171   | 2.3 (1.22 - 4.34)  | 0.025*  |
| SM.a.C42.2 | 2.47 (1.01 - 6.06)  | 0.099  | 1.34 (0.57 - 3.16)  | 0.704  | 2.87 (1.33 - 6.18)  | 0.026* | 3.86 (1.96 - 7.6)   | 0.001*  | 2.04 (1.06 - 3.94) | 0.086   | 3.35 (1.76 - 6.35) | 0.001*  |
| SM.a.C42.3 | 3.17 (1.3 - 7.74)   | 0.035* | 2.52 (1.07 - 5.92)  | 0.120  | 3.67 (1.71 - 7.87)  | 0.006* | 4.61 (2.35 - 9.05)  | <0.001* | 2.7 (1.4 - 5.2)    | 0.015*  | 3.68 (1.95 - 6.96) | <0.001* |
| SM.a.C42.4 | 5.51 (2.27 - 13.4)  | 0.001* | 4.51 (1.93 - 10.55) | 0.005* | 4.31 (2 - 9.25)     | 0.002* | 5.74 (2.93 - 11.23) | <0.001* | 4.86 (2.54 - 9.32) | <0.001* | 5.23 (2.77 - 9.87) | <0.001* |
| SM.a.C42.6 | 2.56 (1.04 - 6.28)  | 0.087  | 1.97 (0.84 - 4.64)  | 0.260  | 2.66 (1.23 - 5.72)  | 0.037* | 2.88 (1.46 - 5.69)  | 0.007*  | 2.38 (1.23 - 4.58) | 0.037*  | 2.82 (1.49 - 5.36) | 0.005*  |
| SM.a.C43.1 | 2.3 (0.94 - 5.65)   | 0.130  | 1.19 (0.5 - 2.8)    | 0.830  | 1.57 (0.73 - 3.36)  | 0.365  | 3.06 (1.55 - 6.04)  | 0.005*  | 1.52 (0.78 - 2.94) | 0.348   | 2.25 (1.19 - 4.24) | 0.029*  |
| SM.a.C43.2 | 1.8 (0.73 - 4.41)   | 0.318  | 1.21 (0.51 - 2.86)  | 0.805  | 1.42 (0.66 - 3.04)  | 0.507  | 3.27 (1.66 - 6.46)  | 0.003*  | 2.33 (1.21 - 4.51) | 0.042*  | 1.92 (1.01 - 3.64) | 0.078   |
| SM.a.C44.6 | 2.3 (0.94 - 5.64)   | 0.130  | 1.92 (0.82 - 4.52)  | 0.274  | 3.18 (1.49 - 6.8)   | 0.012* | 3.06 (1.55 - 6.03)  | 0.005*  | 1.82 (0.94 - 3.52) | 0.168   | 3.66 (1.95 - 6.89) | <0.001* |
| SM.e.C36.2 | 1.3 (0.53 - 3.2)    | 0.666  | 1.11 (0.47 - 2.61)  | 0.913  | 1.79 (0.83 - 3.87)  | 0.234  | 3.46 (1.76 - 6.82)  | 0.002*  | 2 (1.03 - 3.86)    | 0.097   | 2.37 (1.25 - 4.5)  | 0.022*  |
| SM.e.C38.3 | 0.96 (0.39 - 2.37)  | 0.955  | 1.02 (0.43 - 2.41)  | 0.975  | 1.08 (0.5 - 2.32)   | 0.903  | 1.19 (0.6 - 2.36)   | 0.707   | 1.07 (0.55 - 2.08) | 0.889   | 1.6 (0.85 - 3.04)  | 0.203   |
| SM.e.C40.5 | 2.9 (1.19 - 7.09)   | 0.055  | 2.34 (0.99 - 5.53)  | 0.155  | 2.01 (0.94 - 4.32)  | 0.143  | 2.71 (1.38 - 5.35)  | 0.011*  | 2.18 (1.12 - 4.21) | 0.060   | 3.13 (1.66 - 5.92) | 0.002*  |



|                  |                    |       |                    |       |                    |       |                    |        |                    |       |                    |        |
|------------------|--------------------|-------|--------------------|-------|--------------------|-------|--------------------|--------|--------------------|-------|--------------------|--------|
| Carn             | 0.91 (0.36 - 2.26) | 0.865 | 1.95 (0.82 - 4.59) | 0.267 | 2.64 (1.24 - 5.66) | 0.036 | 1.31 (0.65 - 2.62) | 0.547  | 1.36 (0.7 - 2.63)  | 0.515 | 2.49 (1.32 - 4.71) | 0.014  |
| Carn.a.C10.0     | 0.41 (0.17 - 1)    | 0.100 | 0.83 (0.35 - 1.95) | 0.811 | 1.12 (0.52 - 2.4)  | 0.840 | 2.24 (1.14 - 4.43) | 0.041  | 1.6 (0.82 - 3.1)   | 0.291 | 1.91 (1.01 - 3.61) | 0.080  |
| Carn.a.C10.1     | 0.57 (0.23 - 1.39) | 0.334 | 0.8 (0.34 - 1.9)   | 0.781 | 1.21 (0.56 - 2.61) | 0.726 | 1.83 (0.92 - 3.61) | 0.129  | 1.4 (0.72 - 2.72)  | 0.457 | 2.31 (1.22 - 4.37) | 0.025* |
| Carn.a.C12.0     | 0.56 (0.23 - 1.38) | 0.325 | 0.8 (0.34 - 1.88)  | 0.773 | 0.99 (0.46 - 2.13) | 0.994 | 1.45 (0.73 - 2.87) | 0.383  | 1.2 (0.62 - 2.33)  | 0.697 | 1.7 (0.9 - 3.23)   | 0.154  |
| Carn.a.C14.1     | 0.5 (0.2 - 1.23)   | 0.220 | 0.65 (0.28 - 1.53) | 0.510 | 1 (0.47 - 2.16)    | 0.996 | 1.3 (0.66 - 2.58)  | 0.547  | 1 (0.52 - 1.94)    | 0.998 | 1.78 (0.94 - 3.38) | 0.120  |
| Carn.a.C14.2     | 0.39 (0.16 - 0.97) | 0.091 | 0.48 (0.2 - 1.13)  | 0.231 | 0.79 (0.37 - 1.71) | 0.671 | 0.89 (0.45 - 1.77) | 0.833  | 0.92 (0.47 - 1.77) | 0.870 | 1.48 (0.78 - 2.8)  | 0.297  |
| Carn.a.C15.0     | 0.73 (0.3 - 1.8)   | 0.598 | 1.07 (0.45 - 2.51) | 0.954 | 1.72 (0.8 - 3.69)  | 0.263 | 0.99 (0.5 - 1.96)  | 0.983  | 1.06 (0.55 - 2.06) | 0.899 | 1.35 (0.71 - 2.56) | 0.417  |
| Carn.a.C16.0     | 0.63 (0.26 - 1.54) | 0.431 | 0.84 (0.36 - 1.99) | 0.830 | 0.84 (0.39 - 1.8)  | 0.749 | 1.14 (0.57 - 2.25) | 0.800  | 1.41 (0.73 - 2.74) | 0.446 | 1.29 (0.68 - 2.45) | 0.507  |
| Carn.a.C16.0.Oxo | 0.66 (0.27 - 1.62) | 0.492 | 0.73 (0.31 - 1.71) | 0.661 | 0.74 (0.34 - 1.6)  | 0.559 | 0.82 (0.41 - 1.62) | 0.653  | 0.83 (0.43 - 1.6)  | 0.695 | 1.19 (0.62 - 2.26) | 0.665  |
| Carn.a.C16.1     | 0.35 (0.14 - 0.86) | 0.059 | 0.57 (0.24 - 1.33) | 0.356 | 1.09 (0.51 - 2.35) | 0.883 | 0.9 (0.45 - 1.78)  | 0.844  | 1 (0.52 - 1.93)    | 0.998 | 1.67 (0.88 - 3.17) | 0.171  |
| Carn.a.C16.2     | 0.43 (0.17 - 1.05) | 0.125 | 0.55 (0.23 - 1.29) | 0.319 | 1.04 (0.48 - 2.23) | 0.952 | 0.59 (0.3 - 1.17)  | 0.191  | 0.77 (0.4 - 1.49)  | 0.571 | 1.23 (0.65 - 2.33) | 0.594  |
| Carn.a.C18.0     | 0.99 (0.4 - 2.44)  | 0.987 | 0.46 (0.2 - 1.09)  | 0.207 | 0.97 (0.45 - 2.08) | 0.952 | 0.76 (0.38 - 1.51) | 0.537  | 0.62 (0.32 - 1.2)  | 0.286 | 1.02 (0.54 - 1.93) | 0.958  |
| Carn.a.C18.1     | 0.56 (0.23 - 1.37) | 0.318 | 0.77 (0.33 - 1.81) | 0.731 | 1.79 (0.83 - 3.84) | 0.232 | 1.32 (0.67 - 2.61) | 0.533  | 1.27 (0.65 - 2.45) | 0.610 | 2.32 (1.23 - 4.38) | 0.024  |
| Carn.a.C18.2     | 0.6 (0.24 - 1.46)  | 0.375 | 1.02 (0.43 - 2.42) | 0.975 | 1.17 (0.54 - 2.51) | 0.783 | 1.02 (0.52 - 2.02) | 0.978  | 1.14 (0.59 - 2.22) | 0.793 | 1.71 (0.9 - 3.24)  | 0.150  |
| Carn.a.C18.2.OH  | 0.7 (0.28 - 1.72)  | 0.563 | 0.77 (0.33 - 1.82) | 0.731 | 1.12 (0.52 - 2.42) | 0.840 | 0.8 (0.4 - 1.59)   | 0.620  | 0.84 (0.44 - 1.63) | 0.721 | 1.04 (0.54 - 1.98) | 0.924  |
| Carn.a.C2.0      | 1.41 (0.58 - 3.47) | 0.563 | 1.61 (0.68 - 3.78) | 0.455 | 1.92 (0.89 - 4.14) | 0.174 | 2.22 (1.12 - 4.4)  | 0.043* | 1.81 (0.94 - 3.5)  | 0.171 | 3.21 (1.7 - 6.07)  | 0.002* |
| Carn.a.C20.0     | 1.29 (0.52 - 3.18) | 0.680 | 1.45 (0.62 - 3.42) | 0.588 | 0.84 (0.39 - 1.81) | 0.757 | 1.41 (0.71 - 2.81) | 0.421  | 1.65 (0.86 - 3.19) | 0.259 | 1.19 (0.63 - 2.25) | 0.659  |
| Carn.a.C20.1     | 1.23 (0.5 - 3.03)  | 0.745 | 1.11 (0.47 - 2.61) | 0.913 | 1.36 (0.63 - 2.92) | 0.558 | 1.02 (0.52 - 2.03) | 0.978  | 0.94 (0.49 - 1.82) | 0.899 | 1.4 (0.74 - 2.66)  | 0.362  |
| Carn.a.C20.3     | 0.61 (0.25 - 1.5)  | 0.394 | 0.91 (0.39 - 2.15) | 0.913 | 0.62 (0.29 - 1.33) | 0.331 | 0.77 (0.39 - 1.52) | 0.549  | 0.88 (0.45 - 1.7)  | 0.803 | 0.93 (0.49 - 1.78) | 0.863  |

|                                           |                      |         |                    |         |                    |         |                    |         |                    |         |                    |         |
|-------------------------------------------|----------------------|---------|--------------------|---------|--------------------|---------|--------------------|---------|--------------------|---------|--------------------|---------|
| Carn.a.C20.4                              | 0.54 (0.22 - 1.33)   | 0.289   | 0.86 (0.36 - 2.02) | 0.847   | 0.85 (0.4 - 1.84)  | 0.778   | 1.01 (0.51 - 2)    | 0.989   | 0.97 (0.5 - 1.89)  | 0.973   | 1.12 (0.59 - 2.14) | 0.769   |
| Carn.a.C3.0                               | 2.31 (0.94 - 5.68)   | 0.130   | 2.06 (0.88 - 4.84) | 0.242   | 2.14 (1 - 4.6)     | 0.105   | 1.72 (0.87 - 3.41) | 0.177   | 1.44 (0.75 - 2.79) | 0.420   | 2.15 (1.14 - 4.08) | 0.040*  |
| Carn.a.C3.0.DC                            | 0.71 (0.29 - 1.74)   | 0.563   | 0.96 (0.41 - 2.26) | 0.975   | 1.39 (0.64 - 2.98) | 0.541   | 1.1 (0.56 - 2.18)  | 0.849   | 0.9 (0.46 - 1.74)  | 0.837   | 1.28 (0.67 - 2.42) | 0.519   |
| Carn.a.C4.0                               | 2.36 (0.96 - 5.78)   | 0.118   | 1.89 (0.8 - 4.46)  | 0.285   | 1.57 (0.73 - 3.37) | 0.365   | 1.39 (0.7 - 2.75)  | 0.444   | 1.18 (0.61 - 2.3)  | 0.728   | 1.59 (0.84 - 3.01) | 0.209   |
| Carn.a.C5.0                               | 2.73 (1.11 - 6.67)   | 0.071   | 2.32 (0.99 - 5.45) | 0.160   | 2.74 (1.28 - 5.88) | 0.031   | 2.23 (1.13 - 4.41) | 0.043   | 1.81 (0.94 - 3.5)  | 0.171   | 2.55 (1.35 - 4.83) | 0.012*  |
| Carn.a.C6.0                               | 0.84 (0.34 - 2.06)   | 0.785   | 1 (0.42 - 2.36)    | 0.999   | 1.24 (0.58 - 2.67) | 0.691   | 2.03 (1.03 - 4)    | 0.075   | 1.42 (0.73 - 2.75) | 0.446   | 1.77 (0.93 - 3.35) | 0.123   |
| Carn.a.C6.0.OH                            | 0.45 (0.18 - 1.1)    | 0.148   | 0.76 (0.32 - 1.78) | 0.713   | 1.23 (0.57 - 2.64) | 0.707   | 0.91 (0.46 - 1.81) | 0.865   | 0.86 (0.45 - 1.67) | 0.770   | 1.02 (0.54 - 1.94) | 0.958   |
| Carn.a.C8.0                               | 0.44 (0.18 - 1.08)   | 0.138   | 0.76 (0.32 - 1.79) | 0.721   | 0.97 (0.45 - 2.08) | 0.952   | 1.77 (0.89 - 3.49) | 0.155   | 1.33 (0.69 - 2.58) | 0.538   | 1.43 (0.75 - 2.72) | 0.341   |
| Carn.a.C8.1                               | 1.45 (0.59 - 3.57)   | 0.542   | 1.95 (0.83 - 4.57) | 0.267   | 1.49 (0.7 - 3.2)   | 0.430   | 2.66 (1.35 - 5.26) | 0.013   | 2.89 (1.5 - 5.58)  | 0.009*  | 2.99 (1.59 - 5.63) | 0.003*  |
| Carn.a.C9.0                               | 1.03 (0.42 - 2.53)   | 0.962   | 1.14 (0.49 - 2.7)  | 0.867   | 1.46 (0.68 - 3.15) | 0.458   | 1.44 (0.73 - 2.84) | 0.395   | 1.1 (0.57 - 2.12)  | 0.859   | 1.14 (0.6 - 2.16)  | 0.744   |
| Asn/Asp                                   | 0.23 (0.09 - 0.57)   | 0.008*  | 0.15 (0.07 - 0.36) | <0.001* | 0.27 (0.13 - 0.57) | 0.005*  | 0.12 (0.06 - 0.23) | <0.001* | 0.18 (0.09 - 0.34) | <0.001* | 0.16 (0.08 - 0.29) | <0.001* |
| Gln/Glu                                   | 0.33 (0.13 - 0.8)    | 0.043*  | 0.16 (0.07 - 0.38) | <0.001* | 0.16 (0.08 - 0.34) | <0.001* | 0.25 (0.13 - 0.5)  | 0.001*  | 0.2 (0.1 - 0.38)   | <0.001* | 0.13 (0.07 - 0.24) | <0.001* |
| NEFA18.1/NEFA18.0                         | 0.8 (0.33 - 1.97)    | 0.733   | 0.7 (0.3 - 1.65)   | 0.617   | 0.97 (0.45 - 2.07) | 0.953   | 1.08 (0.55 - 2.15) | 0.878   | 0.9 (0.46 - 1.77)  | 0.845   | 1.48 (0.78 - 2.81) | 0.297   |
| NEFA16.1/NEFA16.0                         | 0.84 (0.34 - 2.07)   | 0.789   | 0.78 (0.33 - 1.82) | 0.741   | 1.31 (0.61 - 2.79) | 0.610   | 1.67 (0.84 - 3.31) | 0.207   | 1.41 (0.72 - 2.75) | 0.455   | 1.49 (0.78 - 2.83) | 0.294   |
| PC.aa/PC.ae                               | 12.01 (4.95 - 29.13) | <0.001* | 4.52 (1.93 - 10.6) | 0.005*  | 4.14 (1.95 - 8.8)  | 0.002*  | 3.74 (1.89 - 7.38) | 0.001*  | 3.32 (1.7 - 6.49)  | 0.003*  | 3.58 (1.89 - 6.79) | 0.001*  |
| Lyso.PC.a/PC.aa                           | 1.43 (0.56 - 3.65)   | 0.563   | 2.79 (1.19 - 6.56) | 0.078   | 1.33 (0.62 - 2.86) | 0.579   | 0.64 (0.31 - 1.31) | 0.304   | 1.29 (0.66 - 2.54) | 0.573   | 1.42 (0.74 - 2.72) | 0.352   |
| (lyso.PC.a.C16.0 + lyso.PC.a.C18.0)/PC.aa | 1.19 (0.47 - 3.02)   | 0.792   | 3.47 (1.48 - 8.15) | 0.027*  | 1.65 (0.77 - 3.54) | 0.310   | 0.75 (0.37 - 1.52) | 0.531   | 1.92 (0.98 - 3.76) | 0.136   | 2.05 (1.07 - 3.91) | 0.059   |

|                                     |                    |       |                   |       |                    |       |                    |        |                    |        |                    |        |
|-------------------------------------|--------------------|-------|-------------------|-------|--------------------|-------|--------------------|--------|--------------------|--------|--------------------|--------|
| (lyso.PC.a.C18.1 + lyso.PC.a.C18.2) | 1.12 (0.45 - 2.82) | 0.847 | 0.94 (0.4 - 2.21) | 0.954 | 0.55 (0.26 - 1.18) | 0.220 | 0.38 (0.19 - 0.76) | 0.016* | 0.4 (0.21 - 0.78)  | 0.030* | 0.46 (0.24 - 0.88) | 0.040* |
| Carn.a.C.16.0/free Carn             | 0.7 (0.28 - 1.73)  | 0.563 | 0.6 (0.26 - 1.42) | 0.421 | 0.48 (0.22 - 1.02) | 0.113 | 1.02 (0.51 - 2.03) | 0.982  | 1.22 (0.62 - 2.38) | 0.692  | 0.79 (0.41 - 1.51) | 0.536  |
| Carn.a.C2.0/Carn.a.C16.0            | 1.75 (0.71 - 4.34) | 0.342 | 1.6 (0.68 - 3.77) | 0.455 | 1.77 (0.83 - 3.79) | 0.234 | 1.59 (0.8 - 3.17)  | 0.259  | 1.08 (0.55 - 2.12) | 0.876  | 1.6 (0.84 - 3.04)  | 0.209  |

Values represent absolute differences in blood pressure (95% confidence interval) and corresponding p-values from linear regression models that reflect the difference in blood pressure (mmHg) per SDS increase in maternal early-pregnancy metabolite concentrations (μmol/L) or metabolite ratio. Model includes gestational age at time of measurement. AA amino acids, NEFA non-esterified fatty acids, PC.aa diacyl-phosphatidylcholines, PC.ae acyl-alkyl-phosphatidylcholines, lyso.PC.a acyl-lysophosphatidylcholines, lyso.PC.e alkyl-lysophosphatidylcholines, Carn.a acyl-carnitines, SM sphingomyelins.

<sup>a</sup> p-value corrected for multiple hypothesis testing using Benjamin-Hochberg FDR correction.

\*Statistically significant

**Table S4.** Associations of early-pregnancy individual metabolites with systolic blood pressure in early-, mid- and late pregnancy. Full model.

|                   | <b>Differences in systolic blood pressure in mmHg (95% confidence interval)</b> |                            |                                 |                            |                                  |                            |
|-------------------|---------------------------------------------------------------------------------|----------------------------|---------------------------------|----------------------------|----------------------------------|----------------------------|
| <b>Metabolite</b> | <b>Early pregnancy</b><br>N = 803                                               | <b>P-value<sup>a</sup></b> | <b>Mid pregnancy</b><br>N = 793 | <b>P-value<sup>a</sup></b> | <b>Late pregnancy</b><br>N = 800 | <b>P-value<sup>a</sup></b> |
| Ala               | 3.12 ( 1.24 - 7.8 )                                                             | 0,081                      | 2.02 ( 0.82 - 4.97 )            | 0,362                      | 2.49 ( 1.13 - 5.5 )              | 0,135                      |
| Arg               | 5.08 ( 2.04 - 12.69 )                                                           | 0,007*                     | 2.52 ( 1.02 - 6.25 )            | 0,208                      | 3.28 ( 1.49 - 7.23 )             | 0,063                      |
| Asn               | 3.31 ( 1.32 - 8.3 )                                                             | 0,066                      | 1.11 ( 0.45 - 2.73 )            | 0,917                      | 3.08 ( 1.4 - 6.77 )              | 0,063                      |
| Asp               | 1.99 ( 0.79 - 5.04 )                                                            | 0,336                      | 2.76 ( 1.12 - 6.8 )             | 0,175                      | 3.09 ( 1.4 - 6.84 )              | 0,063                      |
| Cit               | 1.34 ( 0.5 - 3.54 )                                                             | 0,750                      | 0.86 ( 0.33 - 2.22 )            | 0,887                      | 1.15 ( 0.5 - 2.67 )              | 0,884                      |
| Gln               | 2.29 ( 0.92 - 5.68 )                                                            | 0,223                      | 1.04 ( 0.43 - 2.52 )            | 0,968                      | 0.97 ( 0.44 - 2.13 )             | 0,985                      |
| Glu               | 1.79 ( 0.71 - 4.52 )                                                            | 0,417                      | 3.47 ( 1.41 - 8.51 )            | 0,081                      | 3.12 ( 1.41 - 6.9 )              | 0,063                      |
| Gly               | 0.86 ( 0.35 - 2.14 )                                                            | 0,874                      | 1 ( 0.41 - 2.42 )               | 1,000                      | 1.35 ( 0.62 - 2.97 )             | 0,707                      |
| His               | 3.72 ( 1.46 - 9.5 )                                                             | 0,044*                     | 1.59 ( 0.64 - 3.96 )            | 0,560                      | 3.12 ( 1.41 - 6.93 )             | 0,063                      |
| Ile               | 3.22 ( 1.27 - 8.16 )                                                            | 0,077                      | 1.32 ( 0.53 - 3.27 )            | 0,755                      | 1.61 ( 0.72 - 3.57 )             | 0,498                      |
| Leu               | 2.88 ( 1.15 - 7.21 )                                                            | 0,110                      | 1.32 ( 0.54 - 3.23 )            | 0,751                      | 2.12 ( 0.97 - 4.65 )             | 0,222                      |
| Lys               | 0.81 ( 0.32 - 2.04 )                                                            | 0,810                      | 1.39 ( 0.56 - 3.44 )            | 0,700                      | 2.99 ( 1.36 - 6.6 )              | 0,068                      |
| Met               | 2.96 ( 1.19 - 7.41 )                                                            | 0,101                      | 1.49 ( 0.6 - 3.66 )             | 0,614                      | 1.82 ( 0.83 - 4.02 )             | 0,351                      |
| Orn               | 1.28 ( 0.5 - 3.25 )                                                             | 0,781                      | 1.29 ( 0.53 - 3.17 )            | 0,755                      | 2.08 ( 0.94 - 4.59 )             | 0,256                      |
| Phe               | 5.83 ( 2.38 - 14.27 )                                                           | 0,003*                     | 2.51 ( 1.04 - 6.07 )            | 0,208                      | 2.4 ( 1.11 - 5.22 )              | 0,135                      |
| Pro               | 2.39 ( 0.96 - 5.96 )                                                            | 0,193                      | 1.88 ( 0.77 - 4.58 )            | 0,385                      | 1.56 ( 0.71 - 3.42 )             | 0,498                      |
| Trp               | 7.77 ( 3.13 - 19.29 )                                                           | 0,001*                     | 2.93 ( 1.2 - 7.17 )             | 0,158                      | 3.06 ( 1.4 - 6.68 )              | 0,063                      |
| Ser               | 2.22 ( 0.89 - 5.52 )                                                            | 0,243                      | 1.2 ( 0.5 - 2.9 )               | 0,834                      | 2.58 ( 1.18 - 5.64 )             | 0,123                      |
| Thr               | 1.6 ( 0.62 - 4.12 )                                                             | 0,523                      | 1.57 ( 0.62 - 3.95 )            | 0,579                      | 2.18 ( 0.98 - 4.87 )             | 0,214                      |
| Tyr               | 5.55 ( 2.24 - 13.7 )                                                            | 0,004*                     | 2.12 ( 0.88 - 5.15 )            | 0,300                      | 2.75 ( 1.26 - 5.98 )             | 0,091                      |
| Val               | 5.6 ( 2.25 - 13.96 )                                                            | 0,004*                     | 1.95 ( 0.8 - 4.74 )             | 0,374                      | 2.72 ( 1.24 - 5.96 )             | 0,094                      |
| Cys               | 0.97 ( 0.38 - 2.51 )                                                            | 0,983                      | 1.12 ( 0.44 - 2.81 )            | 0,917                      | 1.47 ( 0.65 - 3.33 )             | 0,620                      |
| NEFA_14_0         | 1.59 ( 0.63 - 3.98 )                                                            | 0,520                      | 1.46 ( 0.6 - 3.56 )             | 0,628                      | 0.85 ( 0.39 - 1.87 )             | 0,873                      |
| NEFA_14_1         | 1.03 ( 0.41 - 2.61 )                                                            | 0,983                      | 1.28 ( 0.52 - 3.14 )            | 0,755                      | 0.99 ( 0.45 - 2.21 )             | 0,993                      |
| NEFA_15_0         | 1.68 ( 0.67 - 4.19 )                                                            | 0,463                      | 1.58 ( 0.65 - 3.82 )            | 0,555                      | 0.68 ( 0.31 - 1.49 )             | 0,596                      |
| NEFA_16_0         | 1.81 ( 0.72 - 4.57 )                                                            | 0,408                      | 1.79 ( 0.73 - 4.38 )            | 0,421                      | 0.87 ( 0.39 - 1.94 )             | 0,884                      |
| NEFA_16_1         | 0.93 ( 0.37 - 2.34 )                                                            | 0,933                      | 1.4 ( 0.57 - 3.43 )             | 0,693                      | 1.01 ( 0.45 - 2.25 )             | 0,993                      |
| NEFA_16_2         | 1.31 ( 0.52 - 3.33 )                                                            | 0,750                      | 1.45 ( 0.59 - 3.57 )            | 0,640                      | 0.88 ( 0.4 - 1.97 )              | 0,893                      |
| NEFA_17_0         | 1.48 ( 0.6 - 3.67 )                                                             | 0,593                      | 1.39 ( 0.58 - 3.35 )            | 0,693                      | 0.92 ( 0.42 - 2.01 )             | 0,933                      |
| NEFA_17_1         | 1.57 ( 0.63 - 3.92 )                                                            | 0,523                      | 1.44 ( 0.6 - 3.49 )             | 0,638                      | 0.86 ( 0.39 - 1.9 )              | 0,873                      |
| NEFA_17_2         | 1.73 ( 0.69 - 4.32 )                                                            | 0,439                      | 1.1 ( 0.45 - 2.69 )             | 0,923                      | 0.82 ( 0.37 - 1.8 )              | 0,864                      |
| NEFA_18_0         | 1.55 ( 0.61 - 3.93 )                                                            | 0,546                      | 1.25 ( 0.51 - 3.07 )            | 0,801                      | 0.82 ( 0.37 - 1.81 )             | 0,864                      |
| NEFA_18_1         | 1.36 ( 0.54 - 3.43 )                                                            | 0,703                      | 1.37 ( 0.56 - 3.34 )            | 0,707                      | 1.07 ( 0.49 - 2.38 )             | 0,944                      |
| NEFA_18_2         | 1.57 ( 0.63 - 3.91 )                                                            | 0,523                      | 1.12 ( 0.46 - 2.72 )            | 0,910                      | 0.71 ( 0.32 - 1.56 )             | 0,656                      |
| NEFA_18_3         | 1.9 ( 0.76 - 4.73 )                                                             | 0,356                      | 1.37 ( 0.57 - 3.32 )            | 0,705                      | 0.64 ( 0.29 - 1.41 )             | 0,498                      |
| NEFA_19_1         | 1.24 ( 0.5 - 3.09 )                                                             | 0,804                      | 1.07 ( 0.45 - 2.58 )            | 0,960                      | 0.82 ( 0.38 - 1.8 )              | 0,864                      |
| NEFA_20_1         | 1.6 ( 0.63 - 4.02 )                                                             | 0,520                      | 1.15 ( 0.47 - 2.81 )            | 0,889                      | 1.16 ( 0.52 - 2.57 )             | 0,873                      |
| NEFA_20_2         | 1.26 ( 0.5 - 3.17 )                                                             | 0,784                      | 1.3 ( 0.53 - 3.17 )             | 0,755                      | 1.18 ( 0.53 - 2.61 )             | 0,873                      |
| NEFA_20_3         | 2.69 ( 1.04 - 6.98 )                                                            | 0,166                      | 3.08 ( 1.23 - 7.7 )             | 0,149                      | 1.77 ( 0.78 - 4.01 )             | 0,399                      |
| NEFA_20_4         | 2.19 ( 0.87 - 5.47 )                                                            | 0,257                      | 1.99 ( 0.82 - 4.85 )            | 0,363                      | 1.71 ( 0.78 - 3.76 )             | 0,417                      |

|                 |                        |        |                       |        |                       |        |
|-----------------|------------------------|--------|-----------------------|--------|-----------------------|--------|
| NEFA_20_5       | 2.35 ( 0.93 - 5.94 )   | 0,213  | 1.49 ( 0.61 - 3.67 )  | 0,605  | 1.65 ( 0.75 - 3.64 )  | 0,458  |
| NEFA_22_3       | 1.48 ( 0.59 - 3.73 )   | 0,602  | 2.6 ( 1.06 - 6.35 )   | 0,207  | 2.44 ( 1.1 - 5.43 )   | 0,142  |
| NEFA_22_4       | 2.5 ( 0.97 - 6.43 )    | 0,191  | 2.85 ( 1.15 - 7.09 )  | 0,174  | 2 ( 0.88 - 4.5 )      | 0,306  |
| NEFA_22_5       | 2.2 ( 0.87 - 5.55 )    | 0,257  | 1.81 ( 0.74 - 4.44 )  | 0,416  | 1.58 ( 0.71 - 3.52 )  | 0,498  |
| NEFA_22_6       | 1.77 ( 0.7 - 4.48 )    | 0,422  | 1.29 ( 0.52 - 3.19 )  | 0,755  | 1.27 ( 0.57 - 2.83 )  | 0,816  |
| NEFA_24_0       | 2.36 ( 0.96 - 5.82 )   | 0,193  | 2.08 ( 0.86 - 5.03 )  | 0,320  | 0.9 ( 0.41 - 1.95 )   | 0,904  |
| NEFA_24_1       | 1.1 ( 0.44 - 2.73 )    | 0,914  | 0.75 ( 0.31 - 1.83 )  | 0,745  | 0.99 ( 0.45 - 2.18 )  | 0,993  |
| NEFA_24_2       | 1.01 ( 0.39 - 2.58 )   | 0,990  | 1.46 ( 0.59 - 3.59 )  | 0,638  | 1.43 ( 0.64 - 3.19 )  | 0,640  |
| NEFA_24_4       | 3.18 ( 1.27 - 7.96 )   | 0,077  | 2.83 ( 1.17 - 6.86 )  | 0,169  | 2.58 ( 1.17 - 5.66 )  | 0,126  |
| NEFA_24_5       | 3.49 ( 1.38 - 8.8 )    | 0,052  | 2.48 ( 1.01 - 6.07 )  | 0,208  | 3.72 ( 1.69 - 8.21 )  | 0,030* |
| NEFA_26_0       | 3.71 ( 1.5 - 9.18 )    | 0,041* | 1.81 ( 0.75 - 4.37 )  | 0,416  | 1.64 ( 0.75 - 3.57 )  | 0,458  |
| NEFA_26_1       | 2.02 ( 0.8 - 5.09 )    | 0,320  | 2.53 ( 1.03 - 6.2 )   | 0,208  | 1.88 ( 0.85 - 4.16 )  | 0,325  |
| NEFA_26_2       | 1.43 ( 0.55 - 3.71 )   | 0,651  | 1.76 ( 0.71 - 4.38 )  | 0,440  | 1.4 ( 0.63 - 3.14 )   | 0,660  |
| lyso.PC.a.C14.0 | 14.36 ( 5.71 - 36.13 ) | 0,000* | 8.73 ( 3.51 - 21.7 )  | 0,001* | 5.74 ( 2.57 - 12.83 ) | 0,005* |
| lyso.PC.a.C16.0 | 3.67 ( 1.43 - 9.45 )   | 0,049* | 4.91 ( 1.97 - 12.28 ) | 0,028* | 2.64 ( 1.17 - 5.96 )  | 0,127  |
| lyso.PC.a.C16.1 | 5.19 ( 1.97 - 13.68 )  | 0,011* | 6.23 ( 2.46 - 15.82 ) | 0,009* | 4.9 ( 2.15 - 11.16 )  | 0,011* |
| lyso.PC.a.C18.0 | 2.01 ( 0.78 - 5.18 )   | 0,342  | 3.84 ( 1.54 - 9.54 )  | 0,072  | 1.8 ( 0.81 - 4.04 )   | 0,373  |
| lyso.PC.a.C18.1 | 5.45 ( 2.18 - 13.63 )  | 0,005* | 3 ( 1.22 - 7.37 )     | 0,149  | 1.93 ( 0.87 - 4.28 )  | 0,306  |
| lyso.PC.a.C18.2 | 5.44 ( 2.17 - 13.66 )  | 0,005* | 2.17 ( 0.89 - 5.28 )  | 0,288  | 1.37 ( 0.62 - 3.02 )  | 0,690  |
| lyso.PC.a.C18.3 | 5.96 ( 2.45 - 14.48 )  | 0,003* | 2.16 ( 0.9 - 5.18 )   | 0,288  | 2.86 ( 1.33 - 6.19 )  | 0,073  |
| lyso.PC.a.C20.3 | 8.33 ( 3.34 - 20.78 )  | 0,000* | 6.94 ( 2.84 - 16.96 ) | 0,002* | 4.94 ( 2.25 - 10.88 ) | 0,008* |
| lyso.PC.a.C20.4 | 5.81 ( 2.31 - 14.62 )  | 0,004* | 4.87 ( 2 - 11.88 )    | 0,027* | 2.48 ( 1.12 - 5.47 )  | 0,135  |
| lyso.PC.a.C20.5 | 2.61 ( 1.03 - 6.6 )    | 0,167  | 1.3 ( 0.53 - 3.14 )   | 0,755  | 2.3 ( 1.05 - 5.02 )   | 0,163  |
| lyso.PC.a.C22.6 | 2.83 ( 1.12 - 7.14 )   | 0,118  | 1.64 ( 0.67 - 4.01 )  | 0,514  | 1.24 ( 0.56 - 2.73 )  | 0,851  |
| lyso.PC.e.C16.0 | 2.84 ( 1.12 - 7.21 )   | 0,118  | 2.95 ( 1.19 - 7.28 )  | 0,159  | 1.99 ( 0.89 - 4.44 )  | 0,306  |
| lyso.PC.e.C18.0 | 0.88 ( 0.35 - 2.22 )   | 0,890  | 1.74 ( 0.71 - 4.24 )  | 0,440  | 1.27 ( 0.58 - 2.8 )   | 0,813  |
| lyso.PC.e.C18.1 | 2.54 ( 0.98 - 6.63 )   | 0,191  | 1.3 ( 0.51 - 3.29 )   | 0,755  | 1.56 ( 0.69 - 3.55 )  | 0,519  |
| PC.aa.C30.0     | 6.15 ( 2.46 - 15.34 )  | 0,003* | 3.06 ( 1.25 - 7.52 )  | 0,149  | 2.37 ( 1.07 - 5.22 )  | 0,155  |
| PC.aa.C30.3     | 1.16 ( 0.46 - 2.91 )   | 0,879  | 1.82 ( 0.75 - 4.42 )  | 0,416  | 0.87 ( 0.39 - 1.92 )  | 0,876  |
| PC.aa.C32.0     | 3.84 ( 1.51 - 9.78 )   | 0,041* | 2.63 ( 1.06 - 6.5 )   | 0,207  | 1.79 ( 0.8 - 4.01 )   | 0,378  |
| PC.aa.C32.1     | 5.44 ( 2.13 - 13.89 )  | 0,006* | 3.82 ( 1.54 - 9.47 )  | 0,072  | 3.94 ( 1.77 - 8.75 )  | 0,023* |
| PC.aa.C32.2     | 6.56 ( 2.61 - 16.49 )  | 0,003* | 2.8 ( 1.14 - 6.87 )   | 0,174  | 2.55 ( 1.15 - 5.63 )  | 0,129  |
| PC.aa.C32.3     | 1.42 ( 0.54 - 3.71 )   | 0,668  | 1.8 ( 0.72 - 4.54 )   | 0,428  | 1.17 ( 0.52 - 2.63 )  | 0,873  |
| PC.aa.C34.1     | 3.14 ( 1.24 - 7.97 )   | 0,083  | 3.29 ( 1.35 - 8.04 )  | 0,104  | 2.85 ( 1.29 - 6.31 )  | 0,084  |
| PC.aa.C34.2     | 2.31 ( 0.9 - 5.89 )    | 0,237  | 1.9 ( 0.78 - 4.68 )   | 0,385  | 1.48 ( 0.67 - 3.3 )   | 0,596  |
| PC.aa.C34.3     | 3.22 ( 1.27 - 8.2 )    | 0,077  | 2 ( 0.81 - 4.94 )     | 0,366  | 1.89 ( 0.85 - 4.21 )  | 0,325  |
| PC.aa.C34.4     | 7.95 ( 3.23 - 19.53 )  | 0,000* | 3.8 ( 1.57 - 9.19 )   | 0,072  | 2.72 ( 1.24 - 5.97 )  | 0,094  |
| PC.aa.C34.5     | 4.64 ( 1.81 - 11.95 )  | 0,016* | 1.94 ( 0.77 - 4.88 )  | 0,385  | 1.88 ( 0.84 - 4.23 )  | 0,343  |
| PC.aa.C36.0     | 1.21 ( 0.47 - 3.15 )   | 0,836  | 1.7 ( 0.67 - 4.32 )   | 0,498  | 1.18 ( 0.52 - 2.68 )  | 0,873  |
| PC.aa.C36.1     | 4.12 ( 1.65 - 10.3 )   | 0,026* | 2.4 ( 0.98 - 5.88 )   | 0,233  | 2.28 ( 1.03 - 5.04 )  | 0,170  |
| PC.aa.C36.2     | 2.43 ( 0.95 - 6.22 )   | 0,193  | 1.82 ( 0.74 - 4.51 )  | 0,416  | 1.4 ( 0.63 - 3.12 )   | 0,660  |
| PC.aa.C36.3     | 3.26 ( 1.27 - 8.37 )   | 0,077  | 2.75 ( 1.11 - 6.83 )  | 0,179  | 2.57 ( 1.16 - 5.71 )  | 0,129  |
| PC.aa.C36.4     | 3.51 ( 1.39 - 8.84 )   | 0,052  | 3.71 ( 1.51 - 9.1 )   | 0,074  | 2.47 ( 1.11 - 5.49 )  | 0,135  |

|              |                       |        |                       |        |                      |        |
|--------------|-----------------------|--------|-----------------------|--------|----------------------|--------|
| PC.aa.C36.5  | 4.65 ( 1.85 - 11.68 ) | 0,013* | 1.84 ( 0.74 - 4.54 )  | 0,416  | 3.07 ( 1.39 - 6.78 ) | 0,063  |
| PC.aa.C36.6  | 4.56 ( 1.79 - 11.61 ) | 0,016* | 2.28 ( 0.91 - 5.69 )  | 0,278  | 2.94 ( 1.32 - 6.58 ) | 0,080  |
| PC.aa.C38.0  | 1.2 ( 0.46 - 3.14 )   | 0,839  | 1.13 ( 0.44 - 2.88 )  | 0,910  | 1.01 ( 0.44 - 2.28 ) | 0,993  |
| PC.aa.C38.2  | 2.57 ( 0.99 - 6.63 )  | 0,182  | 2.65 ( 1.06 - 6.65 )  | 0,207  | 2.34 ( 1.04 - 5.26 ) | 0,170  |
| PC.aa.C38.3  | 3.91 ( 1.51 - 10.11 ) | 0,042* | 4.77 ( 1.89 - 12.02 ) | 0,033* | 4.1 ( 1.82 - 9.25 )  | 0,023* |
| PC.aa.C38.4  | 2.42 ( 0.96 - 6.14 )  | 0,193  | 3.64 ( 1.47 - 8.99 )  | 0,078  | 2.4 ( 1.07 - 5.37 )  | 0,155  |
| PC.aa.C38.5  | 2.59 ( 1.03 - 6.47 )  | 0,167  | 2.66 ( 1.09 - 6.48 )  | 0,189  | 3.34 ( 1.52 - 7.36 ) | 0,063  |
| PC.aa.C38.6  | 1.5 ( 0.57 - 3.93 )   | 0,605  | 1.52 ( 0.6 - 3.89 )   | 0,605  | 1.84 ( 0.8 - 4.21 )  | 0,372  |
| PC.aa.C40.0  | 1.79 ( 0.69 - 4.69 )  | 0,426  | 0.98 ( 0.38 - 2.5 )   | 0,974  | 0.93 ( 0.41 - 2.1 )  | 0,944  |
| PC.aa.C40.1  | 1.81 ( 0.71 - 4.63 )  | 0,412  | 2.04 ( 0.82 - 5.07 )  | 0,362  | 1.17 ( 0.52 - 2.61 ) | 0,873  |
| PC.aa.C40.2  | 4.1 ( 1.63 - 10.31 )  | 0,027* | 1.79 ( 0.73 - 4.38 )  | 0,421  | 2.46 ( 1.12 - 5.44 ) | 0,135  |
| PC.aa.C40.3  | 2.58 ( 1.02 - 6.53 )  | 0,168  | 1.93 ( 0.78 - 4.77 )  | 0,385  | 2.46 ( 1.11 - 5.48 ) | 0,135  |
| PC.aa.C40.4  | 3.69 ( 1.46 - 9.32 )  | 0,044* | 4.39 ( 1.79 - 10.77 ) | 0,037* | 4 ( 1.81 - 8.83 )    | 0,023* |
| PC.aa.C40.5  | 2.04 ( 0.82 - 5.05 )  | 0,307  | 3.5 ( 1.45 - 8.43 )   | 0,078  | 3.08 ( 1.41 - 6.74 ) | 0,063  |
| PC.aa.C40.6  | 2.04 ( 0.79 - 5.25 )  | 0,329  | 1.97 ( 0.78 - 4.95 )  | 0,385  | 2.34 ( 1.04 - 5.3 )  | 0,170  |
| PC.aa.C42.0  | 1.13 ( 0.45 - 2.86 )  | 0,890  | 1.04 ( 0.42 - 2.58 )  | 0,968  | 1.61 ( 0.73 - 3.54 ) | 0,495  |
| PC.aa.C42.5  | 1.38 ( 0.55 - 3.46 )  | 0,694  | 0.96 ( 0.39 - 2.35 )  | 0,968  | 1.27 ( 0.58 - 2.78 ) | 0,813  |
| PC.aa.C43.6  | 0.88 ( 0.34 - 2.23 )  | 0,885  | 1.31 ( 0.53 - 3.25 )  | 0,755  | 1.22 ( 0.55 - 2.71 ) | 0,864  |
| PC.aa.C44.12 | 1.3 ( 0.51 - 3.32 )   | 0,763  | 1.75 ( 0.7 - 4.37 )   | 0,440  | 1.58 ( 0.7 - 3.55 )  | 0,498  |
| PC.ae.C30.0  | 3.85 ( 1.53 - 9.68 )  | 0,039* | 2.38 ( 0.97 - 5.85 )  | 0,233  | 1.96 ( 0.89 - 4.33 ) | 0,306  |
| PC.ae.C32.0  | 2.54 ( 1 - 6.42 )     | 0,178  | 2.53 ( 1.04 - 6.19 )  | 0,208  | 1.91 ( 0.87 - 4.23 ) | 0,307  |
| PC.ae.C32.1  | 1.94 ( 0.75 - 4.99 )  | 0,356  | 2.52 ( 1.02 - 6.26 )  | 0,208  | 1.18 ( 0.52 - 2.64 ) | 0,873  |
| PC.ae.C32.2  | 1.58 ( 0.62 - 3.97 )  | 0,523  | 1.43 ( 0.59 - 3.48 )  | 0,654  | 0.75 ( 0.34 - 1.66 ) | 0,742  |
| PC.ae.C34.0  | 2.81 ( 1.11 - 7.1 )   | 0,120  | 2.56 ( 1.04 - 6.27 )  | 0,208  | 1.71 ( 0.77 - 3.78 ) | 0,417  |
| PC.ae.C34.1  | 2.22 ( 0.88 - 5.63 )  | 0,257  | 2.1 ( 0.85 - 5.15 )   | 0,320  | 1.82 ( 0.82 - 4.05 ) | 0,354  |
| PC.ae.C34.2  | 1.63 ( 0.63 - 4.23 )  | 0,514  | 1.52 ( 0.61 - 3.8 )   | 0,605  | 1.15 ( 0.51 - 2.6 )  | 0,884  |
| PC.ae.C34.3  | 1.66 ( 0.67 - 4.14 )  | 0,473  | 1.63 ( 0.67 - 3.92 )  | 0,514  | 0.86 ( 0.39 - 1.9 )  | 0,873  |
| PC.ae.C34.4  | 1.84 ( 0.72 - 4.71 )  | 0,399  | 1.38 ( 0.56 - 3.42 )  | 0,705  | 1.49 ( 0.66 - 3.32 ) | 0,596  |
| PC.ae.C36.0  | 0.97 ( 0.38 - 2.46 )  | 0,983  | 1.79 ( 0.73 - 4.4 )   | 0,421  | 1.09 ( 0.49 - 2.43 ) | 0,933  |
| PC.ae.C36.1  | 1.83 ( 0.72 - 4.64 )  | 0,399  | 2.45 ( 0.99 - 6.05 )  | 0,225  | 2.53 ( 1.14 - 5.6 )  | 0,134  |
| PC.ae.C36.2  | 1.12 ( 0.43 - 2.91 )  | 0,902  | 1.04 ( 0.42 - 2.61 )  | 0,968  | 1.07 ( 0.48 - 2.41 ) | 0,948  |
| PC.ae.C36.3  | 1.88 ( 0.74 - 4.76 )  | 0,381  | 1.78 ( 0.72 - 4.4 )   | 0,428  | 1.84 ( 0.83 - 4.09 ) | 0,351  |
| PC.ae.C36.4  | 2.52 ( 1.01 - 6.27 )  | 0,175  | 4.2 ( 1.73 - 10.2 )   | 0,040* | 2.19 ( 1 - 4.81 )    | 0,200  |
| PC.ae.C36.5  | 2.02 ( 0.81 - 5 )     | 0,317  | 2.22 ( 0.92 - 5.39 )  | 0,278  | 1.42 ( 0.65 - 3.11 ) | 0,640  |
| PC.ae.C38.0  | 1.64 ( 0.63 - 4.26 )  | 0,513  | 1.03 ( 0.41 - 2.6 )   | 0,968  | 1.59 ( 0.7 - 3.59 )  | 0,498  |
| PC.ae.C38.2  | 1.99 ( 0.76 - 5.18 )  | 0,352  | 2.35 ( 0.93 - 5.93 )  | 0,271  | 1.31 ( 0.57 - 2.97 ) | 0,800  |
| PC.ae.C38.3  | 2.5 ( 0.97 - 6.42 )   | 0,191  | 3.6 ( 1.44 - 8.97 )   | 0,081  | 3.11 ( 1.39 - 6.98 ) | 0,063  |
| PC.ae.C38.4  | 1.94 ( 0.78 - 4.82 )  | 0,346  | 3.08 ( 1.27 - 7.47 )  | 0,137  | 1.93 ( 0.88 - 4.25 ) | 0,306  |
| PC.ae.C38.5  | 1.67 ( 0.67 - 4.19 )  | 0,468  | 2.26 ( 0.93 - 5.52 )  | 0,276  | 1.57 ( 0.71 - 3.46 ) | 0,498  |
| PC.ae.C38.6  | 1.72 ( 0.67 - 4.38 )  | 0,454  | 1.77 ( 0.71 - 4.43 )  | 0,440  | 1.59 ( 0.71 - 3.54 ) | 0,498  |
| PC.ae.C40.0  | 1.79 ( 0.67 - 4.73 )  | 0,439  | 1.15 ( 0.45 - 2.97 )  | 0,892  | 1.48 ( 0.64 - 3.43 ) | 0,628  |
| PC.ae.C40.1  | 2.97 ( 1.13 - 7.8 )   | 0,118  | 1.33 ( 0.52 - 3.42 )  | 0,755  | 1.74 ( 0.76 - 3.98 ) | 0,422  |
| PC.ae.C40.2  | 1.22 ( 0.48 - 3.14 )  | 0,828  | 0.97 ( 0.39 - 2.42 )  | 0,968  | 2.13 ( 0.96 - 4.74 ) | 0,230  |
| PC.ae.C40.3  | 2.08 ( 0.8 - 5.37 )   | 0,318  | 2.25 ( 0.89 - 5.69 )  | 0,288  | 1.63 ( 0.72 - 3.7 )  | 0,498  |

|              |                      |       |                      |       |                      |        |
|--------------|----------------------|-------|----------------------|-------|----------------------|--------|
| PC.ae.C40.4  | 2.18 ( 0.86 - 5.53 ) | 0,263 | 3.52 ( 1.43 - 8.7 )  | 0,081 | 2.04 ( 0.91 - 4.57 ) | 0,289  |
| PC.ae.C40.5  | 1.14 ( 0.45 - 2.91 ) | 0,885 | 1.55 ( 0.63 - 3.84 ) | 0,579 | 1.61 ( 0.72 - 3.6 )  | 0,498  |
| PC.ae.C40.6  | 1.02 ( 0.39 - 2.63 ) | 0,988 | 1.22 ( 0.49 - 3.06 ) | 0,831 | 1.48 ( 0.65 - 3.34 ) | 0,613  |
| PC.ae.C42.1  | 2.17 ( 0.83 - 5.65 ) | 0,286 | 2.25 ( 0.88 - 5.71 ) | 0,288 | 1.6 ( 0.71 - 3.64 )  | 0,498  |
| PC.ae.C42.3  | 0.86 ( 0.33 - 2.26 ) | 0,881 | 0.64 ( 0.25 - 1.62 ) | 0,579 | 1.17 ( 0.51 - 2.66 ) | 0,873  |
| PC.ae.C42.4  | 2.18 ( 0.86 - 5.56 ) | 0,263 | 2.17 ( 0.88 - 5.38 ) | 0,300 | 1.94 ( 0.87 - 4.31 ) | 0,306  |
| PC.ae.C42.5  | 1.25 ( 0.49 - 3.18 ) | 0,804 | 1.74 ( 0.7 - 4.32 )  | 0,440 | 1.79 ( 0.8 - 4.01 )  | 0,378  |
| PC.ae.C42.6  | 1.02 ( 0.4 - 2.62 )  | 0,988 | 0.95 ( 0.38 - 2.37 ) | 0,968 | 1.16 ( 0.52 - 2.59 ) | 0,873  |
| SM.a.C30.1   | 2.27 ( 0.9 - 5.75 )  | 0,241 | 2.53 ( 1.03 - 6.2 )  | 0,208 | 1.93 ( 0.88 - 4.24 ) | 0,306  |
| SM.a.C32.1   | 1.84 ( 0.72 - 4.7 )  | 0,399 | 2.41 ( 0.98 - 5.94 ) | 0,233 | 2 ( 0.9 - 4.45 )     | 0,302  |
| SM.a.C32.2   | 1.86 ( 0.7 - 4.93 )  | 0,412 | 3.18 ( 1.25 - 8.11 ) | 0,149 | 3.17 ( 1.4 - 7.19 )  | 0,063  |
| SM.a.C33.1   | 1.02 ( 0.39 - 2.63 ) | 0,988 | 1.54 ( 0.62 - 3.8 )  | 0,582 | 1.27 ( 0.57 - 2.84 ) | 0,816  |
| SM.a.C34.1   | 1.01 ( 0.39 - 2.63 ) | 0,988 | 1.63 ( 0.65 - 4.09 ) | 0,531 | 1.3 ( 0.57 - 2.93 )  | 0,801  |
| SM.a.C34.2   | 1.12 ( 0.41 - 3.05 ) | 0,910 | 2 ( 0.76 - 5.29 )    | 0,385 | 1.67 ( 0.71 - 3.9 )  | 0,495  |
| SM.a.C35.0   | 0.77 ( 0.3 - 1.96 )  | 0,761 | 0.88 ( 0.36 - 2.17 ) | 0,900 | 1.25 ( 0.56 - 2.79 ) | 0,846  |
| SM.a.C35.1   | 0.37 ( 0.14 - 0.98 ) | 0,168 | 0.83 ( 0.33 - 2.09 ) | 0,837 | 0.73 ( 0.33 - 1.65 ) | 0,711  |
| SM.a.C36.1   | 0.74 ( 0.28 - 1.96 ) | 0,738 | 1.46 ( 0.57 - 3.75 ) | 0,648 | 1 ( 0.44 - 2.3 )     | 0,993  |
| SM.a.C36.2   | 0.43 ( 0.16 - 1.18 ) | 0,263 | 1.19 ( 0.45 - 3.16 ) | 0,871 | 0.88 ( 0.37 - 2.07 ) | 0,893  |
| SM.a.C36.3   | 0.76 ( 0.28 - 2.06 ) | 0,765 | 0.88 ( 0.34 - 2.31 ) | 0,910 | 0.99 ( 0.43 - 2.31 ) | 0,993  |
| SM.a.C37.1   | 1.22 ( 0.47 - 3.17 ) | 0,829 | 1.29 ( 0.51 - 3.22 ) | 0,755 | 2.18 ( 0.98 - 4.85 ) | 0,214  |
| SM.a.C38.2   | 1.29 ( 0.5 - 3.36 )  | 0,768 | 1.9 ( 0.77 - 4.71 )  | 0,385 | 1.3 ( 0.58 - 2.9 )   | 0,800  |
| SM.a.C38.3   | 1.24 ( 0.48 - 3.16 ) | 0,810 | 1.49 ( 0.61 - 3.65 ) | 0,605 | 0.96 ( 0.44 - 2.13 ) | 0,985  |
| SM.a.C39.1   | 2.2 ( 0.83 - 5.83 )  | 0,286 | 2.26 ( 0.89 - 5.76 ) | 0,288 | 2.32 ( 1.02 - 5.29 ) | 0,180  |
| SM.a.C39.2   | 0.73 ( 0.28 - 1.93 ) | 0,723 | 0.76 ( 0.3 - 1.91 )  | 0,755 | 1.21 ( 0.54 - 2.73 ) | 0,864  |
| SM.a.C40.2   | 1.88 ( 0.73 - 4.83 ) | 0,384 | 2.83 ( 1.14 - 7 )    | 0,174 | 2.02 ( 0.91 - 4.5 )  | 0,295  |
| SM.a.C40.5   | 3.42 ( 1.36 - 8.59 ) | 0,056 | 2.05 ( 0.83 - 5.03 ) | 0,351 | 4.07 ( 1.86 - 8.9 )  | 0,023* |
| SM.a.C41.1   | 2.9 ( 1.14 - 7.36 )  | 0,111 | 1.94 ( 0.79 - 4.72 ) | 0,385 | 1.71 ( 0.78 - 3.75 ) | 0,417  |
| SM.a.C41.2   | 1.33 ( 0.52 - 3.41 ) | 0,744 | 1.03 ( 0.42 - 2.54 ) | 0,968 | 1.99 ( 0.9 - 4.4 )   | 0,305  |
| SM.a.C42.1   | 1.51 ( 0.6 - 3.82 )  | 0,579 | 1.06 ( 0.43 - 2.6 )  | 0,968 | 1.3 ( 0.59 - 2.86 )  | 0,800  |
| SM.a.C42.2   | 1.09 ( 0.42 - 2.84 ) | 0,930 | 0.85 ( 0.34 - 2.16 ) | 0,875 | 1.42 ( 0.63 - 3.22 ) | 0,656  |
| SM.a.C42.3   | 1 ( 0.38 - 2.61 )    | 0,992 | 1.56 ( 0.62 - 3.95 ) | 0,579 | 1.59 ( 0.7 - 3.6 )   | 0,498  |
| SM.a.C42.4   | 2.4 ( 0.95 - 6.03 )  | 0,193 | 2.78 ( 1.13 - 6.81 ) | 0,174 | 1.95 ( 0.88 - 4.33 ) | 0,306  |
| SM.a.C42.6   | 1.96 ( 0.75 - 5.11 ) | 0,356 | 1.95 ( 0.77 - 4.94 ) | 0,385 | 1.94 ( 0.85 - 4.43 ) | 0,319  |
| SM.a.C43.1   | 1.59 ( 0.61 - 4.13 ) | 0,523 | 1.07 ( 0.42 - 2.69 ) | 0,966 | 1.05 ( 0.47 - 2.37 ) | 0,969  |
| SM.a.C43.2   | 1.17 ( 0.46 - 2.98 ) | 0,874 | 1.22 ( 0.49 - 3.04 ) | 0,831 | 0.93 ( 0.42 - 2.08 ) | 0,944  |
| SM.a.C44.6   | 1.39 ( 0.54 - 3.6 )  | 0,694 | 1.63 ( 0.65 - 4.12 ) | 0,534 | 1.86 ( 0.82 - 4.18 ) | 0,351  |
| SM.e.C36.2   | 0.47 ( 0.18 - 1.27 ) | 0,320 | 0.73 ( 0.28 - 1.87 ) | 0,720 | 0.89 ( 0.39 - 2.05 ) | 0,906  |
| SM.e.C38.3   | 0.97 ( 0.39 - 2.45 ) | 0,983 | 1.28 ( 0.53 - 3.13 ) | 0,755 | 1.02 ( 0.46 - 2.24 ) | 0,993  |
| SM.e.C40.5   | 1.49 ( 0.6 - 3.71 )  | 0,590 | 1.85 ( 0.76 - 4.51 ) | 0,398 | 1.11 ( 0.51 - 2.43 ) | 0,906  |
| Carn         | 1.14 ( 0.44 - 2.95 ) | 0,885 | 1.93 ( 0.78 - 4.77 ) | 0,385 | 2.5 ( 1.13 - 5.56 )  | 0,135  |
| Carn.a.C10.0 | 0.47 ( 0.19 - 1.18 ) | 0,274 | 0.83 ( 0.34 - 2.04 ) | 0,834 | 1.03 ( 0.46 - 2.29 ) | 0,985  |
| Carn.a.C10.1 | 0.56 ( 0.22 - 1.43 ) | 0,417 | 0.6 ( 0.24 - 1.5 )   | 0,514 | 0.84 ( 0.37 - 1.87 ) | 0,873  |
| Carn.a.C12.0 | 0.68 ( 0.27 - 1.72 ) | 0,608 | 0.82 ( 0.33 - 2.01 ) | 0,831 | 1.17 ( 0.53 - 2.58 ) | 0,873  |
| Carn.a.C14.1 | 0.61 ( 0.24 - 1.52 ) | 0,487 | 0.65 ( 0.26 - 1.59 ) | 0,579 | 1 ( 0.45 - 2.21 )    | 0,993  |
| Carn.a.C14.2 | 0.52 ( 0.21 - 1.3 )  | 0,356 | 0.56 ( 0.23 - 1.35 ) | 0,416 | 0.97 ( 0.44 - 2.13 ) | 0,985  |

|                                           |                      |        |                      |       |                      |       |
|-------------------------------------------|----------------------|--------|----------------------|-------|----------------------|-------|
| Carn.a.C15.0                              | 0.89 ( 0.36 - 2.24 ) | 0,902  | 1 ( 0.41 - 2.42 )    | 0,999 | 1.74 ( 0.79 - 3.83 ) | 0,399 |
| Carn.a.C16.0                              | 0.74 ( 0.3 - 1.85 )  | 0,720  | 0.84 ( 0.34 - 2.03 ) | 0,837 | 0.89 ( 0.4 - 1.95 )  | 0,893 |
| Carn.a.C16.0.Oxo                          | 1.11 ( 0.44 - 2.83 ) | 0,910  | 0.96 ( 0.38 - 2.39 ) | 0,968 | 1.03 ( 0.46 - 2.32 ) | 0,985 |
| Carn.a.C16.1                              | 0.34 ( 0.14 - 0.86 ) | 0,108  | 0.56 ( 0.23 - 1.37 ) | 0,421 | 1.19 ( 0.53 - 2.64 ) | 0,873 |
| Carn.a.C16.2                              | 0.57 ( 0.23 - 1.41 ) | 0,417  | 0.65 ( 0.27 - 1.56 ) | 0,579 | 1.19 ( 0.54 - 2.61 ) | 0,873 |
| Carn.a.C18.0                              | 1.21 ( 0.48 - 3.01 ) | 0,834  | 0.51 ( 0.21 - 1.23 ) | 0,367 | 0.99 ( 0.45 - 2.19 ) | 0,993 |
| Carn.a.C18.1                              | 0.53 ( 0.21 - 1.35 ) | 0,381  | 0.73 ( 0.29 - 1.81 ) | 0,708 | 1.43 ( 0.64 - 3.18 ) | 0,640 |
| Carn.a.C18.2                              | 0.68 ( 0.27 - 1.69 ) | 0,598  | 0.91 ( 0.37 - 2.21 ) | 0,923 | 0.94 ( 0.43 - 2.07 ) | 0,962 |
| Carn.a.C18.2.OH                           | 0.93 ( 0.38 - 2.31 ) | 0,938  | 0.87 ( 0.36 - 2.1 )  | 0,887 | 1.22 ( 0.55 - 2.68 ) | 0,864 |
| Carn.a.C2.0                               | 1.69 ( 0.67 - 4.26 ) | 0,465  | 1.82 ( 0.75 - 4.45 ) | 0,416 | 1.85 ( 0.83 - 4.1 )  | 0,347 |
| Carn.a.C20.0                              | 1.45 ( 0.57 - 3.65 ) | 0,618  | 1.87 ( 0.77 - 4.53 ) | 0,391 | 0.85 ( 0.38 - 1.87 ) | 0,873 |
| Carn.a.C20.1                              | 1.58 ( 0.64 - 3.91 ) | 0,520  | 1.03 ( 0.43 - 2.46 ) | 0,968 | 1.38 ( 0.64 - 3.01 ) | 0,660 |
| Carn.a.C20.3                              | 0.91 ( 0.37 - 2.24 ) | 0,914  | 1.25 ( 0.52 - 2.99 ) | 0,786 | 0.7 ( 0.32 - 1.53 )  | 0,640 |
| Carn.a.C20.4                              | 0.77 ( 0.31 - 1.92 ) | 0,760  | 1.03 ( 0.42 - 2.48 ) | 0,968 | 0.95 ( 0.43 - 2.09 ) | 0,969 |
| Carn.a.C3.0                               | 2.9 ( 1.16 - 7.23 )  | 0,107  | 2.28 ( 0.94 - 5.51 ) | 0,263 | 2.32 ( 1.06 - 5.07 ) | 0,162 |
| Carn.a.C3.0.DC                            | 0.79 ( 0.31 - 2 )    | 0,784  | 1.06 ( 0.43 - 2.62 ) | 0,968 | 1.6 ( 0.72 - 3.58 )  | 0,498 |
| Carn.a.C4.0                               | 3.54 ( 1.43 - 8.75 ) | 0,044* | 2.36 ( 0.97 - 5.7 )  | 0,233 | 1.9 ( 0.87 - 4.16 )  | 0,306 |
| Carn.a.C5.0                               | 2.9 ( 1.16 - 7.21 )  | 0,107  | 2.47 ( 1.02 - 6.02 ) | 0,208 | 2.82 ( 1.29 - 6.2 )  | 0,084 |
| Carn.a.C6.0                               | 0.86 ( 0.34 - 2.18 ) | 0,874  | 1.08 ( 0.44 - 2.67 ) | 0,958 | 1.09 ( 0.49 - 2.42 ) | 0,934 |
| Carn.a.C6.0.OH                            | 0.58 ( 0.23 - 1.48 ) | 0,448  | 1.22 ( 0.49 - 3.03 ) | 0,831 | 1.75 ( 0.78 - 3.91 ) | 0,406 |
| Carn.a.C8.0                               | 0.51 ( 0.2 - 1.29 )  | 0,346  | 0.74 ( 0.3 - 1.83 )  | 0,730 | 0.86 ( 0.38 - 1.91 ) | 0,873 |
| Carn.a.C8.1                               | 0.85 ( 0.33 - 2.19 ) | 0,865  | 1.03 ( 0.41 - 2.6 )  | 0,968 | 0.7 ( 0.31 - 1.59 )  | 0,656 |
| Carn.a.C9.0                               | 1.63 ( 0.65 - 4.08 ) | 0,504  | 1.29 ( 0.53 - 3.16 ) | 0,755 | 1.68 ( 0.76 - 3.7 )  | 0,436 |
| Asn/Asp                                   | 0.97 ( 0.39 - 2.38 ) | 0,983  | 0.45 ( 0.19 - 1.08 ) | 0,278 | 0.79 ( 0.36 - 1.71 ) | 0,811 |
| Gln/Glu                                   | 1.04 ( 0.41 - 2.62 ) | 0,983  | 0.37 ( 0.15 - 0.89 ) | 0,175 | 0.36 ( 0.16 - 0.81 ) | 0,095 |
| NEFA18.1/NEFA18.0                         | 0.83 ( 0.33 - 2.13 ) | 0,839  | 0.65 ( 0.26 - 1.61 ) | 0,581 | 0.9 ( 0.4 - 2.02 )   | 0,906 |
| NEFA16.1/NEFA16.0                         | 0.44 ( 0.17 - 1.15 ) | 0,257  | 0.66 ( 0.26 - 1.67 ) | 0,605 | 1.22 ( 0.53 - 2.79 ) | 0,864 |
| PC.aa/PC.ae                               | 3.66 ( 1.45 - 9.27 ) | 0,044* | 2.21 ( 0.9 - 5.41 )  | 0,288 | 2.29 ( 1.04 - 5.07 ) | 0,170 |
| Lyso.PC.a/PC.aa                           | 1.53 ( 0.59 - 3.95 ) | 0,578  | 2 ( 0.82 - 4.89 )    | 0,362 | 1.11 ( 0.5 - 2.47 )  | 0,906 |
| (lyso.PC.a.C16.0 + lyso.PC.a.C18.0)/PC.aa | 0.97 ( 0.37 - 2.51 ) | 0,983  | 2.11 ( 0.86 - 5.2 )  | 0,320 | 1.13 ( 0.5 - 2.54 )  | 0,893 |
| (lyso.PC.a.C18.1 + lyso.PC.a.C18.2)       | 2.42 ( 0.95 - 6.12 ) | 0,193  | 1.19 ( 0.49 - 2.89 ) | 0,837 | 0.79 ( 0.36 - 1.74 ) | 0,813 |
| Carn.a.C.16.0/ free Carn                  | 0.69 ( 0.27 - 1.72 ) | 0,608  | 0.61 ( 0.25 - 1.48 ) | 0,511 | 0.52 ( 0.24 - 1.15 ) | 0,306 |
| Carn.a.C2.0/ Carn.a.C16.0                 | 1.89 ( 0.76 - 4.71 ) | 0,356  | 1.89 ( 0.78 - 4.58 ) | 0,385 | 1.7 ( 0.77 - 3.74 )  | 0,417 |

Values represent absolute differences in blood pressure (95% confidence interval) and corresponding p-values from linear regression models that reflect the difference in blood pressure (mmHg) per SDS increase in maternal early-pregnancy metabolite concentrations ( $\mu\text{mol/L}$ ) or metabolite ratio. Model includes gestational age at time of measurement, age, parity, pre-pregnancy body mass index, educational level, smoking and folic acid supplementation. AA amino acids, NEFA non-esterified fatty acids, PC.aa diacyl-phosphatidylcholines, PC.ae acyl-alkyl-phosphatidylcholines, lyso.PC.a acyl-lysophosphatidylcholines, lyso.PC.e alkyl-lysophosphatidylcholines, Carn.a acyl-carnitines, SM sphingomyelins

<sup>a</sup> p-value corrected for multiple hypothesis testing using Benjamin-Hochberg FDR correction.

\*Statistically significant



**Table S5.** Associations of early-pregnancy individual metabolites with diastolic blood pressure in early-, mid- and late pregnancy. Full model.

|                   | <b>Differences in diastolic blood pressure in mmHg (95% confidence interval)</b> |                                 |                                  |                                 |                                   |                                 |
|-------------------|----------------------------------------------------------------------------------|---------------------------------|----------------------------------|---------------------------------|-----------------------------------|---------------------------------|
| <b>Metabolite</b> | <b>Early pregnancy<br/>N = 803</b>                                               | <b>P-<br/>value<sup>a</sup></b> | <b>Mid pregnancy<br/>N = 793</b> | <b>P-<br/>value<sup>a</sup></b> | <b>Late pregnancy<br/>N = 800</b> | <b>P-<br/>value<sup>a</sup></b> |
| Ala               | 1.1 ( 0.55 - 2.18 )                                                              | 0,839                           | 1.55 ( 0.8 - 3.02 )              | 0,419                           | 2.41 ( 1.29 - 4.51 )              | 0,054                           |
| Arg               | 1.95 ( 0.98 - 3.87 )                                                             | 0,147                           | 1.13 ( 0.58 - 2.2 )              | 0,838                           | 1.78 ( 0.95 - 3.33 )              | 0,136                           |
| Asn               | 0.95 ( 0.47 - 1.88 )                                                             | 0,908                           | 0.84 ( 0.43 - 1.64 )             | 0,769                           | 1.81 ( 0.96 - 3.4 )               | 0,131                           |
| Asp               | 2.69 ( 1.34 - 5.41 )                                                             | 0,038*                          | 1.77 ( 0.91 - 3.43 )             | 0,280                           | 3.15 ( 1.68 - 5.9 )               | 0,009                           |
| Cit               | 0.98 ( 0.47 - 2.04 )                                                             | 0,977                           | 0.73 ( 0.36 - 1.46 )             | 0,594                           | 1.14 ( 0.58 - 2.21 )              | 0,728                           |
| Gln               | 1.31 ( 0.66 - 2.59 )                                                             | 0,542                           | 0.68 ( 0.35 - 1.31 )             | 0,461                           | 0.78 ( 0.42 - 1.47 )              | 0,503                           |
| Glu               | 2.67 ( 1.34 - 5.31 )                                                             | 0,038*                          | 2.02 ( 1.04 - 3.92 )             | 0,203                           | 3.75 ( 2.01 - 6.99 )              | 0,008*                          |
| Gly               | 0.77 ( 0.39 - 1.52 )                                                             | 0,552                           | 0.9 ( 0.47 - 1.72 )              | 0,852                           | 1.6 ( 0.86 - 2.98 )               | 0,212                           |
| His               | 0.99 ( 0.49 - 2 )                                                                | 0,983                           | 0.83 ( 0.42 - 1.64 )             | 0,769                           | 1.98 ( 1.04 - 3.77 )              | 0,102                           |
| Ile               | 0.67 ( 0.34 - 1.35 )                                                             | 0,385                           | 0.83 ( 0.42 - 1.63 )             | 0,769                           | 1.47 ( 0.78 - 2.79 )              | 0,300                           |
| Leu               | 0.79 ( 0.4 - 1.57 )                                                              | 0,591                           | 0.84 ( 0.43 - 1.63 )             | 0,769                           | 1.72 ( 0.92 - 3.21 )              | 0,152                           |
| Lys               | 0.47 ( 0.23 - 0.93 )                                                             | 0,099                           | 1.19 ( 0.61 - 2.31 )             | 0,769                           | 2.21 ( 1.18 - 4.14 )              | 0,064                           |
| Met               | 0.97 ( 0.49 - 1.93 )                                                             | 0,957                           | 0.88 ( 0.45 - 1.71 )             | 0,814                           | 1.27 ( 0.68 - 2.38 )              | 0,508                           |
| Orn               | 0.68 ( 0.34 - 1.36 )                                                             | 0,390                           | 1 ( 0.51 - 1.94 )                | 0,999                           | 2.13 ( 1.13 - 4.01 )              | 0,071                           |
| Phe               | 1.71 ( 0.87 - 3.36 )                                                             | 0,216                           | 1.27 ( 0.66 - 2.44 )             | 0,687                           | 2.08 ( 1.12 - 3.84 )              | 0,071                           |
| Pro               | 0.96 ( 0.49 - 1.9 )                                                              | 0,939                           | 0.81 ( 0.42 - 1.55 )             | 0,715                           | 1.43 ( 0.77 - 2.67 )              | 0,316                           |
| Trp               | 1.11 ( 0.56 - 2.22 )                                                             | 0,821                           | 1.05 ( 0.54 - 2.04 )             | 0,927                           | 1.48 ( 0.79 - 2.76 )              | 0,289                           |
| Ser               | 1.57 ( 0.79 - 3.1 )                                                              | 0,306                           | 0.97 ( 0.5 - 1.85 )              | 0,939                           | 2.1 ( 1.13 - 3.91 )               | 0,071                           |
| Thr               | 0.82 ( 0.41 - 1.66 )                                                             | 0,669                           | 1.04 ( 0.52 - 2.05 )             | 0,939                           | 1.65 ( 0.87 - 3.12 )              | 0,199                           |
| Tyr               | 1.29 ( 0.65 - 2.54 )                                                             | 0,566                           | 0.95 ( 0.49 - 1.83 )             | 0,927                           | 1.62 ( 0.87 - 3.01 )              | 0,202                           |
| Val               | 1.24 ( 0.63 - 2.47 )                                                             | 0,615                           | 0.95 ( 0.49 - 1.82 )             | 0,926                           | 1.72 ( 0.92 - 3.21 )              | 0,152                           |
| Cys               | 0.36 ( 0.18 - 0.73 )                                                             | 0,038*                          | 0.71 ( 0.36 - 1.39 )             | 0,521                           | 0.99 ( 0.52 - 1.89 )              | 0,977                           |
| NEFA_14_0         | 2.16 ( 1.09 - 4.27 )                                                             | 0,094                           | 1.37 ( 0.71 - 2.65 )             | 0,553                           | 1.1 ( 0.59 - 2.05 )               | 0,786                           |
| NEFA_14_1         | 3.23 ( 1.63 - 6.42 )                                                             | 0,019*                          | 2 ( 1.03 - 3.88 )                | 0,203                           | 1.39 ( 0.73 - 2.62 )              | 0,377                           |
| NEFA_15_0         | 2.19 ( 1.11 - 4.31 )                                                             | 0,091                           | 1.49 ( 0.78 - 2.87 )             | 0,443                           | 0.87 ( 0.46 - 1.62 )              | 0,675                           |
| NEFA_16_0         | 2.78 ( 1.4 - 5.52 )                                                              | 0,037*                          | 1.72 ( 0.88 - 3.33 )             | 0,309                           | 1.46 ( 0.78 - 2.76 )              | 0,300                           |
| NEFA_16_1         | 3.3 ( 1.66 - 6.56 )                                                              | 0,018*                          | 2.2 ( 1.14 - 4.27 )              | 0,144                           | 2.16 ( 1.15 - 4.06 )              | 0,067                           |
| NEFA_16_2         | 2.62 ( 1.32 - 5.23 )                                                             | 0,043*                          | 1.59 ( 0.81 - 3.09 )             | 0,407                           | 1.62 ( 0.86 - 3.06 )              | 0,208                           |
| NEFA_17_0         | 2.25 ( 1.14 - 4.41 )                                                             | 0,085                           | 1.66 ( 0.86 - 3.19 )             | 0,340                           | 1.17 ( 0.63 - 2.18 )              | 0,646                           |
| NEFA_17_1         | 2.69 ( 1.36 - 5.31 )                                                             | 0,038*                          | 1.94 ( 1.01 - 3.73 )             | 0,217                           | 1.27 ( 0.68 - 2.38 )              | 0,509                           |
| NEFA_17_2         | 1.81 ( 0.91 - 3.59 )                                                             | 0,187                           | 1.08 ( 0.56 - 2.1 )              | 0,883                           | 1.37 ( 0.73 - 2.56 )              | 0,390                           |
| NEFA_18_0         | 2.49 ( 1.25 - 4.97 )                                                             | 0,054                           | 1.27 ( 0.65 - 2.47 )             | 0,704                           | 0.96 ( 0.51 - 1.83 )              | 0,917                           |
| NEFA_18_1         | 2.92 ( 1.48 - 5.79 )                                                             | 0,032*                          | 1.56 ( 0.81 - 3.02 )             | 0,414                           | 1.87 ( 1 - 3.51 )                 | 0,111                           |
| NEFA_18_2         | 2.38 ( 1.21 - 4.69 )                                                             | 0,064                           | 1.16 ( 0.6 - 2.24 )              | 0,788                           | 1.33 ( 0.71 - 2.48 )              | 0,428                           |
| NEFA_18_3         | 1.72 ( 0.87 - 3.4 )                                                              | 0,216                           | 1.09 ( 0.57 - 2.1 )              | 0,872                           | 1.26 ( 0.68 - 2.35 )              | 0,510                           |
| NEFA_19_1         | 2.26 ( 1.15 - 4.44 )                                                             | 0,085                           | 1.45 ( 0.76 - 2.79 )             | 0,468                           | 1.21 ( 0.65 - 2.27 )              | 0,574                           |
| NEFA_20_1         | 2.93 ( 1.47 - 5.81 )                                                             | 0,032*                          | 1.37 ( 0.7 - 2.66 )              | 0,566                           | 2.17 ( 1.16 - 4.09 )              | 0,066                           |
| NEFA_20_2         | 2.73 ( 1.38 - 5.4 )                                                              | 0,038*                          | 2.01 ( 1.04 - 3.88 )             | 0,203                           | 2.29 ( 1.22 - 4.29 )              | 0,064                           |
| NEFA_20_3         | 3.45 ( 1.7 - 7 )                                                                 | 0,018*                          | 2.8 ( 1.43 - 5.52 )              | 0,049*                          | 1.91 ( 1 - 3.66 )                 | 0,109                           |
| NEFA_20_4         | 3.82 ( 1.94 - 7.53 )                                                             | 0,007*                          | 2.02 ( 1.05 - 3.88 )             | 0,203                           | 2.68 ( 1.44 - 4.99 )              | 0,032*                          |

|                 |                      |        |                      |        |                      |        |
|-----------------|----------------------|--------|----------------------|--------|----------------------|--------|
| NEFA_20_5       | 2.08 ( 1.04 - 4.15 ) | 0,113  | 1.2 ( 0.62 - 2.32 )  | 0,769  | 2.09 ( 1.12 - 3.92 ) | 0,071  |
| NEFA_22_3       | 3.09 ( 1.55 - 6.14 ) | 0,027* | 3.01 ( 1.55 - 5.84 ) | 0,047* | 2.4 ( 1.27 - 4.55 )  | 0,054  |
| NEFA_22_4       | 4.51 ( 2.25 - 9.06 ) | 0,005* | 2.82 ( 1.43 - 5.53 ) | 0,049* | 2.73 ( 1.43 - 5.2 )  | 0,033* |
| NEFA_22_5       | 3.99 ( 2.01 - 7.91 ) | 0,007* | 2.18 ( 1.12 - 4.22 ) | 0,150  | 2.25 ( 1.19 - 4.24 ) | 0,064  |
| NEFA_22_6       | 3.56 ( 1.79 - 7.08 ) | 0,012* | 1.77 ( 0.91 - 3.44 ) | 0,280  | 1.99 ( 1.06 - 3.75 ) | 0,095  |
| NEFA_24_0       | 1.25 ( 0.64 - 2.46 ) | 0,605  | 0.9 ( 0.47 - 1.73 )  | 0,856  | 0.95 ( 0.51 - 1.76 ) | 0,883  |
| NEFA_24_1       | 1.51 ( 0.76 - 2.98 ) | 0,351  | 0.79 ( 0.41 - 1.52 ) | 0,691  | 1.7 ( 0.91 - 3.18 )  | 0,158  |
| NEFA_24_2       | 2.46 ( 1.22 - 4.95 ) | 0,061  | 1.44 ( 0.74 - 2.81 ) | 0,489  | 1.62 ( 0.85 - 3.07 ) | 0,212  |
| NEFA_24_4       | 2.8 ( 1.41 - 5.54 )  | 0,034* | 2.58 ( 1.34 - 4.96 ) | 0,058  | 2.19 ( 1.18 - 4.1 )  | 0,064  |
| NEFA_24_5       | 3.85 ( 1.93 - 7.65 ) | 0,007* | 2.99 ( 1.55 - 5.79 ) | 0,047* | 3.15 ( 1.68 - 5.92 ) | 0,009* |
| NEFA_26_0       | 2.54 ( 1.29 - 5 )    | 0,046* | 1.22 ( 0.63 - 2.34 ) | 0,755  | 1.47 ( 0.79 - 2.74 ) | 0,297  |
| NEFA_26_1       | 2.82 ( 1.42 - 5.61 ) | 0,034* | 1.84 ( 0.94 - 3.58 ) | 0,250  | 1.75 ( 0.93 - 3.29 ) | 0,151  |
| NEFA_26_2       | 2.28 ( 1.12 - 4.65 ) | 0,091  | 1.61 ( 0.81 - 3.19 ) | 0,407  | 1.35 ( 0.7 - 2.6 )   | 0,428  |
| lyso.PC.a.C14.0 | 2.33 ( 1.15 - 4.69 ) | 0,085  | 3.44 ( 1.75 - 6.76 ) | 0,047* | 3.07 ( 1.61 - 5.83 ) | 0,015* |
| lyso.PC.a.C16.0 | 1.51 ( 0.74 - 3.07 ) | 0,370  | 2.77 ( 1.41 - 5.44 ) | 0,050  | 3.35 ( 1.77 - 6.37 ) | 0,009* |
| lyso.PC.a.C16.1 | 1.96 ( 0.95 - 4.06 ) | 0,162  | 2.91 ( 1.46 - 5.82 ) | 0,049* | 3.81 ( 1.97 - 7.35 ) | 0,008* |
| lyso.PC.a.C18.0 | 1.33 ( 0.66 - 2.71 ) | 0,537  | 1.91 ( 0.97 - 3.76 ) | 0,237  | 2.29 ( 1.21 - 4.35 ) | 0,064  |
| lyso.PC.a.C18.1 | 1.82 ( 0.91 - 3.64 ) | 0,187  | 1.82 ( 0.94 - 3.54 ) | 0,255  | 2.69 ( 1.44 - 5.03 ) | 0,032* |
| lyso.PC.a.C18.2 | 1.25 ( 0.62 - 2.49 ) | 0,615  | 0.92 ( 0.48 - 1.78 ) | 0,880  | 1.23 ( 0.65 - 2.31 ) | 0,559  |
| lyso.PC.a.C18.3 | 1.13 ( 0.58 - 2.21 ) | 0,794  | 1.08 ( 0.57 - 2.05 ) | 0,890  | 1.89 ( 1.02 - 3.48 ) | 0,102  |
| lyso.PC.a.C20.3 | 2.34 ( 1.17 - 4.65 ) | 0,077  | 2.8 ( 1.44 - 5.43 )  | 0,049* | 2.26 ( 1.21 - 4.24 ) | 0,064  |
| lyso.PC.a.C20.4 | 3.09 ( 1.55 - 6.18 ) | 0,027* | 2.66 ( 1.37 - 5.14 ) | 0,052  | 2.67 ( 1.43 - 5.01 ) | 0,032* |
| lyso.PC.a.C20.5 | 1.25 ( 0.62 - 2.51 ) | 0,614  | 1.41 ( 0.73 - 2.7 )  | 0,511  | 2.02 ( 1.09 - 3.76 ) | 0,079  |
| lyso.PC.a.C22.6 | 1.62 ( 0.81 - 3.24 ) | 0,284  | 1.46 ( 0.76 - 2.83 ) | 0,468  | 1.46 ( 0.78 - 2.74 ) | 0,300  |
| lyso.PC.e.C16.0 | 1.16 ( 0.58 - 2.33 ) | 0,760  | 1.89 ( 0.97 - 3.68 ) | 0,237  | 1.83 ( 0.97 - 3.46 ) | 0,129  |
| lyso.PC.e.C18.0 | 1.01 ( 0.51 - 2.01 ) | 0,983  | 2.08 ( 1.08 - 4 )    | 0,184  | 1.63 ( 0.87 - 3.06 ) | 0,201  |
| lyso.PC.e.C18.1 | 1.8 ( 0.88 - 3.67 )  | 0,210  | 2.01 ( 1.01 - 3.98 ) | 0,217  | 2.25 ( 1.18 - 4.31 ) | 0,064  |
| PC.aa.C30.0     | 2.05 ( 1.03 - 4.08 ) | 0,117  | 1.76 ( 0.91 - 3.41 ) | 0,284  | 1.47 ( 0.78 - 2.77 ) | 0,300  |
| PC.aa.C30.3     | 1.76 ( 0.88 - 3.51 ) | 0,210  | 1.41 ( 0.73 - 2.73 ) | 0,511  | 1.31 ( 0.69 - 2.49 ) | 0,459  |
| PC.aa.C32.0     | 2.89 ( 1.44 - 5.8 )  | 0,034* | 2.22 ( 1.14 - 4.32 ) | 0,144  | 2.41 ( 1.27 - 4.57 ) | 0,054  |
| PC.aa.C32.1     | 2.53 ( 1.26 - 5.11 ) | 0,054  | 2.78 ( 1.42 - 5.44 ) | 0,049  | 2.59 ( 1.36 - 4.92 ) | 0,043* |
| PC.aa.C32.2     | 1.87 ( 0.93 - 3.75 ) | 0,169  | 2.16 ( 1.12 - 4.19 ) | 0,152  | 1.64 ( 0.87 - 3.1 )  | 0,200  |
| PC.aa.C32.3     | 2.19 ( 1.07 - 4.48 ) | 0,104  | 2.13 ( 1.08 - 4.21 ) | 0,184  | 2.4 ( 1.25 - 4.6 )   | 0,060  |
| PC.aa.C34.1     | 2.27 ( 1.13 - 4.53 ) | 0,088  | 2.26 ( 1.17 - 4.38 ) | 0,126  | 2.56 ( 1.36 - 4.82 ) | 0,043* |
| PC.aa.C34.2     | 1.59 ( 0.78 - 3.21 ) | 0,308  | 1.47 ( 0.76 - 2.87 ) | 0,468  | 1.79 ( 0.94 - 3.39 ) | 0,140  |
| PC.aa.C34.3     | 1.55 ( 0.77 - 3.12 ) | 0,336  | 1.87 ( 0.96 - 3.64 ) | 0,237  | 2.03 ( 1.07 - 3.84 ) | 0,087  |
| PC.aa.C34.4     | 2.44 ( 1.24 - 4.81 ) | 0,054  | 2.49 ( 1.3 - 4.78 )  | 0,068  | 1.72 ( 0.92 - 3.21 ) | 0,152  |
| PC.aa.C34.5     | 2.31 ( 1.13 - 4.69 ) | 0,088  | 1.61 ( 0.81 - 3.19 ) | 0,407  | 1.84 ( 0.96 - 3.52 ) | 0,131  |
| PC.aa.C36.0     | 1.83 ( 0.9 - 3.73 )  | 0,195  | 1.71 ( 0.86 - 3.4 )  | 0,335  | 1.76 ( 0.92 - 3.38 ) | 0,152  |
| PC.aa.C36.1     | 2.16 ( 1.09 - 4.29 ) | 0,094  | 1.51 ( 0.78 - 2.93 ) | 0,438  | 2.33 ( 1.24 - 4.37 ) | 0,060  |
| PC.aa.C36.2     | 1.58 ( 0.78 - 3.2 )  | 0,309  | 1.31 ( 0.67 - 2.57 ) | 0,651  | 1.61 ( 0.85 - 3.07 ) | 0,215  |
| PC.aa.C36.3     | 1.75 ( 0.86 - 3.55 ) | 0,221  | 1.88 ( 0.96 - 3.68 ) | 0,237  | 1.84 ( 0.97 - 3.5 )  | 0,128  |
| PC.aa.C36.4     | 2.53 ( 1.27 - 5.05 ) | 0,052  | 2.81 ( 1.45 - 5.42 ) | 0,049  | 2.23 ( 1.18 - 4.21 ) | 0,064  |
| PC.aa.C36.5     | 1.78 ( 0.89 - 3.56 ) | 0,201  | 1.8 ( 0.92 - 3.5 )   | 0,269  | 2.54 ( 1.35 - 4.78 ) | 0,043* |
| PC.aa.C36.6     | 1.44 ( 0.71 - 2.9 )  | 0,430  | 1.81 ( 0.92 - 3.56 ) | 0,269  | 1.94 ( 1.02 - 3.69 ) | 0,102  |

|              |                      |        |                      |        |                      |        |
|--------------|----------------------|--------|----------------------|--------|----------------------|--------|
| PC.aa.C38.0  | 1.4 ( 0.68 - 2.86 )  | 0,465  | 1.19 ( 0.59 - 2.37 ) | 0,772  | 1.97 ( 1.03 - 3.79 ) | 0,102  |
| PC.aa.C38.2  | 1.38 ( 0.68 - 2.8 )  | 0,481  | 1.89 ( 0.96 - 3.72 ) | 0,237  | 1.82 ( 0.96 - 3.48 ) | 0,131  |
| PC.aa.C38.3  | 2.14 ( 1.05 - 4.37 ) | 0,109  | 2.47 ( 1.25 - 4.89 ) | 0,096  | 2.12 ( 1.11 - 4.06 ) | 0,074  |
| PC.aa.C38.4  | 2.77 ( 1.39 - 5.54 ) | 0,038* | 2.54 ( 1.31 - 4.94 ) | 0,068  | 2.3 ( 1.22 - 4.35 )  | 0,064  |
| PC.aa.C38.5  | 2.18 ( 1.1 - 4.33 )  | 0,093  | 2.32 ( 1.21 - 4.47 ) | 0,111  | 2.7 ( 1.44 - 5.05 )  | 0,032* |
| PC.aa.C38.6  | 1.64 ( 0.8 - 3.36 )  | 0,294  | 1.69 ( 0.84 - 3.37 ) | 0,360  | 1.98 ( 1.02 - 3.83 ) | 0,102  |
| PC.aa.C40.0  | 1.91 ( 0.93 - 3.91 ) | 0,170  | 1.06 ( 0.53 - 2.13 ) | 0,926  | 1.59 ( 0.83 - 3.07 ) | 0,236  |
| PC.aa.C40.1  | 2.61 ( 1.3 - 5.26 )  | 0,046* | 1.48 ( 0.75 - 2.91 ) | 0,468  | 1.38 ( 0.73 - 2.62 ) | 0,388  |
| PC.aa.C40.2  | 2.69 ( 1.35 - 5.36 ) | 0,038* | 1.56 ( 0.81 - 3.04 ) | 0,414  | 1.93 ( 1.03 - 3.63 ) | 0,102  |
| PC.aa.C40.3  | 2.88 ( 1.44 - 5.75 ) | 0,034* | 2.22 ( 1.14 - 4.32 ) | 0,144  | 1.92 ( 1.02 - 3.63 ) | 0,105  |
| PC.aa.C40.4  | 3.34 ( 1.68 - 6.64 ) | 0,018* | 3.1 ( 1.6 - 6.01 )   | 0,047* | 2.34 ( 1.24 - 4.39 ) | 0,060  |
| PC.aa.C40.5  | 2.08 ( 1.06 - 4.1 )  | 0,107  | 2.35 ( 1.23 - 4.49 ) | 0,096  | 2.1 ( 1.13 - 3.91 )  | 0,071  |
| PC.aa.C40.6  | 2.08 ( 1.03 - 4.21 ) | 0,120  | 1.72 ( 0.87 - 3.39 ) | 0,316  | 2.1 ( 1.1 - 4 )      | 0,075  |
| PC.aa.C42.0  | 1.68 ( 0.84 - 3.34 ) | 0,249  | 1.28 ( 0.66 - 2.51 ) | 0,687  | 1.92 ( 1.02 - 3.59 ) | 0,102  |
| PC.aa.C42.5  | 1.86 ( 0.94 - 3.7 )  | 0,169  | 1.45 ( 0.75 - 2.81 ) | 0,478  | 1.82 ( 0.97 - 3.41 ) | 0,127  |
| PC.aa.C43.6  | 1.45 ( 0.72 - 2.92 ) | 0,414  | 1.61 ( 0.82 - 3.15 ) | 0,407  | 1.92 ( 1.01 - 3.62 ) | 0,105  |
| PC.aa.C44.12 | 1.75 ( 0.87 - 3.52 ) | 0,216  | 1.54 ( 0.78 - 3.02 ) | 0,433  | 2.22 ( 1.17 - 4.22 ) | 0,064  |
| PC.ae.C30.0  | 1.97 ( 0.99 - 3.93 ) | 0,143  | 1.74 ( 0.9 - 3.38 )  | 0,298  | 1.38 ( 0.73 - 2.6 )  | 0,378  |
| PC.ae.C32.0  | 1.83 ( 0.91 - 3.67 ) | 0,187  | 1.67 ( 0.86 - 3.24 ) | 0,345  | 1.66 ( 0.88 - 3.14 ) | 0,189  |
| PC.ae.C32.1  | 1.97 ( 0.97 - 3.99 ) | 0,148  | 1.79 ( 0.91 - 3.51 ) | 0,280  | 1.78 ( 0.93 - 3.4 )  | 0,150  |
| PC.ae.C32.2  | 1.58 ( 0.79 - 3.16 ) | 0,306  | 1.16 ( 0.6 - 2.25 )  | 0,793  | 1.39 ( 0.73 - 2.63 ) | 0,376  |
| PC.ae.C34.0  | 1.97 ( 0.98 - 3.93 ) | 0,144  | 1.71 ( 0.88 - 3.33 ) | 0,311  | 1.25 ( 0.66 - 2.36 ) | 0,533  |
| PC.ae.C34.1  | 1.65 ( 0.82 - 3.32 ) | 0,269  | 1.51 ( 0.77 - 2.93 ) | 0,443  | 1.74 ( 0.92 - 3.29 ) | 0,152  |
| PC.ae.C34.2  | 1.42 ( 0.7 - 2.89 )  | 0,462  | 1.16 ( 0.58 - 2.31 ) | 0,795  | 1.64 ( 0.85 - 3.16 ) | 0,212  |
| PC.ae.C34.3  | 1.46 ( 0.73 - 2.89 ) | 0,400  | 1.14 ( 0.59 - 2.21 ) | 0,809  | 1.47 ( 0.78 - 2.77 ) | 0,300  |
| PC.ae.C34.4  | 1.52 ( 0.75 - 3.07 ) | 0,356  | 1.22 ( 0.62 - 2.4 )  | 0,754  | 1.74 ( 0.91 - 3.31 ) | 0,157  |
| PC.ae.C36.0  | 1.9 ( 0.95 - 3.82 )  | 0,165  | 1.94 ( 1 - 3.77 )    | 0,227  | 2.09 ( 1.1 - 3.96 )  | 0,075  |
| PC.ae.C36.1  | 2.23 ( 1.11 - 4.45 ) | 0,091  | 1.98 ( 1.02 - 3.86 ) | 0,217  | 2.41 ( 1.28 - 4.53 ) | 0,054  |
| PC.ae.C36.2  | 1.15 ( 0.56 - 2.35 ) | 0,773  | 1.05 ( 0.53 - 2.08 ) | 0,932  | 1.19 ( 0.61 - 2.29 ) | 0,639  |
| PC.ae.C36.3  | 1.67 ( 0.83 - 3.36 ) | 0,258  | 1.55 ( 0.79 - 3.04 ) | 0,431  | 2.25 ( 1.19 - 4.26 ) | 0,064  |
| PC.ae.C36.4  | 2.8 ( 1.42 - 5.52 )  | 0,034* | 2.63 ( 1.37 - 5.06 ) | 0,052  | 2.38 ( 1.28 - 4.44 ) | 0,054  |
| PC.ae.C36.5  | 2.5 ( 1.27 - 4.91 )  | 0,050  | 2.05 ( 1.07 - 3.94 ) | 0,184  | 2.16 ( 1.16 - 4.02 ) | 0,064  |
| PC.ae.C38.0  | 1.27 ( 0.62 - 2.61 ) | 0,599  | 1.51 ( 0.76 - 2.99 ) | 0,461  | 1.83 ( 0.95 - 3.53 ) | 0,134  |
| PC.ae.C38.2  | 1.41 ( 0.69 - 2.89 ) | 0,464  | 1.32 ( 0.66 - 2.62 ) | 0,651  | 1.25 ( 0.65 - 2.42 ) | 0,543  |
| PC.ae.C38.3  | 2.04 ( 1 - 4.14 )    | 0,133  | 2.48 ( 1.26 - 4.87 ) | 0,093  | 2.1 ( 1.1 - 4 )      | 0,075  |
| PC.ae.C38.4  | 2.06 ( 1.04 - 4.06 ) | 0,113  | 1.93 ( 1 - 3.7 )     | 0,223  | 1.91 ( 1.02 - 3.57 ) | 0,102  |
| PC.ae.C38.5  | 2.18 ( 1.1 - 4.32 )  | 0,093  | 2 ( 1.03 - 3.85 )    | 0,203  | 2.37 ( 1.27 - 4.43 ) | 0,054  |
| PC.ae.C38.6  | 2.23 ( 1.11 - 4.49 ) | 0,091  | 1.74 ( 0.89 - 3.42 ) | 0,307  | 2.45 ( 1.3 - 4.64 )  | 0,054  |
| PC.ae.C40.0  | 1.99 ( 0.96 - 4.14 ) | 0,154  | 1.91 ( 0.95 - 3.85 ) | 0,243  | 1.59 ( 0.81 - 3.11 ) | 0,248  |
| PC.ae.C40.1  | 1.81 ( 0.87 - 3.73 ) | 0,210  | 1.35 ( 0.67 - 2.72 ) | 0,626  | 1.58 ( 0.81 - 3.07 ) | 0,248  |
| PC.ae.C40.2  | 1.62 ( 0.8 - 3.28 )  | 0,291  | 1.16 ( 0.59 - 2.3 )  | 0,793  | 1.92 ( 1.01 - 3.65 ) | 0,109  |
| PC.ae.C40.3  | 2.23 ( 1.1 - 4.54 )  | 0,094  | 1.56 ( 0.78 - 3.09 ) | 0,433  | 1.49 ( 0.77 - 2.86 ) | 0,300  |
| PC.ae.C40.4  | 1.94 ( 0.97 - 3.87 ) | 0,150  | 1.44 ( 0.74 - 2.81 ) | 0,491  | 1.67 ( 0.88 - 3.17 ) | 0,189  |
| PC.ae.C40.5  | 1.76 ( 0.88 - 3.54 ) | 0,210  | 1.34 ( 0.68 - 2.61 ) | 0,622  | 2.23 ( 1.18 - 4.24 ) | 0,064  |
| PC.ae.C40.6  | 1.4 ( 0.69 - 2.85 )  | 0,464  | 1.25 ( 0.63 - 2.48 ) | 0,715  | 1.97 ( 1.03 - 3.77 ) | 0,102  |

|                  |                      |       |                      |        |                      |        |
|------------------|----------------------|-------|----------------------|--------|----------------------|--------|
| PC.ae.C42.1      | 2.79 ( 1.37 - 5.7 )  | 0,038 | 3.23 ( 1.63 - 6.4 )  | 0,047* | 1.58 ( 0.82 - 3.04 ) | 0,242  |
| PC.ae.C42.3      | 1.07 ( 0.52 - 2.19 ) | 0,903 | 0.68 ( 0.34 - 1.36 ) | 0,483  | 1.26 ( 0.65 - 2.46 ) | 0,533  |
| PC.ae.C42.4      | 1.59 ( 0.79 - 3.21 ) | 0,306 | 1.42 ( 0.73 - 2.78 ) | 0,511  | 1.85 ( 0.98 - 3.5 )  | 0,126  |
| PC.ae.C42.5      | 1.59 ( 0.79 - 3.19 ) | 0,306 | 1.19 ( 0.61 - 2.34 ) | 0,769  | 1.93 ( 1.02 - 3.67 ) | 0,105  |
| PC.ae.C42.6      | 1.21 ( 0.6 - 2.45 )  | 0,676 | 0.96 ( 0.49 - 1.9 )  | 0,939  | 1.6 ( 0.84 - 3.04 )  | 0,226  |
| SM.a.C30.1       | 1.89 ( 0.94 - 3.81 ) | 0,168 | 1.79 ( 0.92 - 3.48 ) | 0,272  | 1.59 ( 0.85 - 3 )    | 0,215  |
| SM.a.C32.1       | 1.79 ( 0.88 - 3.62 ) | 0,209 | 2.28 ( 1.17 - 4.43 ) | 0,126  | 1.64 ( 0.86 - 3.11 ) | 0,204  |
| SM.a.C32.2       | 2.2 ( 1.06 - 4.59 )  | 0,109 | 2.35 ( 1.18 - 4.65 ) | 0,126  | 2.47 ( 1.28 - 4.76 ) | 0,054  |
| SM.a.C33.1       | 1.42 ( 0.69 - 2.9 )  | 0,464 | 1.5 ( 0.76 - 2.96 )  | 0,456  | 1.37 ( 0.72 - 2.64 ) | 0,397  |
| SM.a.C34.1       | 2.02 ( 0.99 - 4.12 ) | 0,141 | 1.58 ( 0.8 - 3.12 )  | 0,414  | 1.57 ( 0.82 - 3.01 ) | 0,248  |
| SM.a.C34.2       | 2.72 ( 1.28 - 5.76 ) | 0,054 | 1.96 ( 0.96 - 3.98 ) | 0,237  | 2.04 ( 1.03 - 4 )    | 0,102  |
| SM.a.C35.0       | 1.66 ( 0.82 - 3.35 ) | 0,272 | 1.32 ( 0.67 - 2.6 )  | 0,649  | 1.82 ( 0.95 - 3.5 )  | 0,135  |
| SM.a.C35.1       | 1.16 ( 0.56 - 2.39 ) | 0,766 | 1.45 ( 0.73 - 2.87 ) | 0,497  | 1.44 ( 0.75 - 2.78 ) | 0,335  |
| SM.a.C36.1       | 1.85 ( 0.89 - 3.82 ) | 0,196 | 1.9 ( 0.96 - 3.79 )  | 0,237  | 2.35 ( 1.22 - 4.53 ) | 0,064  |
| SM.a.C36.2       | 1.78 ( 0.84 - 3.79 ) | 0,237 | 1.95 ( 0.96 - 3.98 ) | 0,237  | 2.24 ( 1.13 - 4.42 ) | 0,071  |
| SM.a.C36.3       | 1.71 ( 0.81 - 3.64 ) | 0,272 | 1.57 ( 0.77 - 3.18 ) | 0,433  | 2.04 ( 1.04 - 4.01 ) | 0,102  |
| SM.a.C37.1       | 1.32 ( 0.64 - 2.69 ) | 0,555 | 1.55 ( 0.79 - 3.04 ) | 0,433  | 2.4 ( 1.27 - 4.55 )  | 0,054  |
| SM.a.C38.2       | 1.37 ( 0.67 - 2.8 )  | 0,497 | 1.6 ( 0.82 - 3.14 )  | 0,407  | 2.19 ( 1.15 - 4.18 ) | 0,067  |
| SM.a.C38.3       | 1.33 ( 0.66 - 2.69 ) | 0,533 | 1.59 ( 0.82 - 3.08 ) | 0,407  | 1.83 ( 0.97 - 3.46 ) | 0,129  |
| SM.a.C39.1       | 1.97 ( 0.95 - 4.1 )  | 0,163 | 1.78 ( 0.89 - 3.56 ) | 0,303  | 1.94 ( 1 - 3.76 )    | 0,109  |
| SM.a.C39.2       | 1.11 ( 0.53 - 2.32 ) | 0,835 | 1.1 ( 0.55 - 2.2 )   | 0,872  | 1.67 ( 0.86 - 3.23 ) | 0,204  |
| SM.a.C40.2       | 2 ( 0.99 - 4.07 )    | 0,143 | 2.11 ( 1.08 - 4.13 ) | 0,184  | 2.27 ( 1.2 - 4.32 )  | 0,064  |
| SM.a.C40.5       | 2.03 ( 1.02 - 4.05 ) | 0,124 | 1.91 ( 0.98 - 3.7 )  | 0,237  | 3.38 ( 1.81 - 6.32 ) | 0,009* |
| SM.a.C41.1       | 1.95 ( 0.97 - 3.92 ) | 0,148 | 1.89 ( 0.98 - 3.66 ) | 0,237  | 2.14 ( 1.15 - 4 )    | 0,067  |
| SM.a.C41.2       | 1.57 ( 0.77 - 3.18 ) | 0,320 | 1.48 ( 0.76 - 2.9 )  | 0,461  | 2.12 ( 1.12 - 4 )    | 0,071  |
| SM.a.C42.1       | 2.03 ( 1.02 - 4.04 ) | 0,123 | 1.26 ( 0.65 - 2.43 ) | 0,705  | 1.7 ( 0.91 - 3.18 )  | 0,163  |
| SM.a.C42.2       | 2.16 ( 1.06 - 4.43 ) | 0,109 | 1.24 ( 0.63 - 2.47 ) | 0,729  | 2.14 ( 1.11 - 4.1 )  | 0,073  |
| SM.a.C42.3       | 2.11 ( 1.03 - 4.32 ) | 0,117 | 1.57 ( 0.79 - 3.11 ) | 0,419  | 2.15 ( 1.12 - 4.14 ) | 0,071  |
| SM.a.C42.4       | 2.67 ( 1.34 - 5.31 ) | 0,038 | 2.78 ( 1.44 - 5.37 ) | 0,049  | 2.73 ( 1.45 - 5.13 ) | 0,032* |
| SM.a.C42.6       | 1.99 ( 0.97 - 4.07 ) | 0,148 | 2.02 ( 1.02 - 4 )    | 0,217  | 2.24 ( 1.17 - 4.32 ) | 0,066  |
| SM.a.C43.1       | 2.34 ( 1.15 - 4.75 ) | 0,085 | 1.18 ( 0.6 - 2.34 )  | 0,772  | 1.56 ( 0.82 - 2.99 ) | 0,248  |
| SM.a.C43.2       | 2.17 ( 1.07 - 4.37 ) | 0,103 | 1.84 ( 0.94 - 3.62 ) | 0,250  | 1.46 ( 0.77 - 2.77 ) | 0,309  |
| SM.a.C44.6       | 1.84 ( 0.9 - 3.73 )  | 0,193 | 1.4 ( 0.71 - 2.75 )  | 0,552  | 2.3 ( 1.21 - 4.38 )  | 0,064  |
| SM.e.C36.2       | 1.63 ( 0.78 - 3.42 ) | 0,306 | 1.27 ( 0.63 - 2.56 ) | 0,709  | 1.54 ( 0.78 - 3.02 ) | 0,283  |
| SM.e.C38.3       | 1.26 ( 0.63 - 2.52 ) | 0,605 | 1.32 ( 0.68 - 2.57 ) | 0,626  | 2.12 ( 1.13 - 4 )    | 0,071  |
| SM.e.C40.5       | 1.7 ( 0.86 - 3.36 )  | 0,221 | 1.56 ( 0.81 - 3.01 ) | 0,414  | 2.14 ( 1.15 - 3.97 ) | 0,067  |
| Carn             | 1.5 ( 0.74 - 3.04 )  | 0,377 | 1.28 ( 0.65 - 2.49 ) | 0,691  | 2.26 ( 1.2 - 4.26 )  | 0,064  |
| Carn.a.C10.0     | 2.22 ( 1.12 - 4.42 ) | 0,091 | 1.24 ( 0.63 - 2.41 ) | 0,729  | 1.65 ( 0.87 - 3.1 )  | 0,199  |
| Carn.a.C10.1     | 1.64 ( 0.82 - 3.31 ) | 0,276 | 1.03 ( 0.53 - 2.03 ) | 0,939  | 1.91 ( 1.01 - 3.62 ) | 0,109  |
| Carn.a.C12.0     | 1.72 ( 0.86 - 3.41 ) | 0,221 | 1.17 ( 0.61 - 2.28 ) | 0,774  | 1.93 ( 1.03 - 3.63 ) | 0,102  |
| Carn.a.C14.1     | 1.39 ( 0.7 - 2.76 )  | 0,464 | 0.84 ( 0.43 - 1.63 ) | 0,769  | 1.88 ( 1 - 3.52 )    | 0,109  |
| Carn.a.C14.2     | 1.09 ( 0.55 - 2.16 ) | 0,849 | 0.91 ( 0.47 - 1.75 ) | 0,872  | 1.79 ( 0.96 - 3.34 ) | 0,131  |
| Carn.a.C15.0     | 1.19 ( 0.6 - 2.37 )  | 0,694 | 1.03 ( 0.54 - 1.99 ) | 0,939  | 1.5 ( 0.8 - 2.81 )   | 0,277  |
| Carn.a.C16.0     | 1.36 ( 0.69 - 2.68 ) | 0,488 | 1.51 ( 0.79 - 2.92 ) | 0,433  | 1.44 ( 0.77 - 2.69 ) | 0,316  |
| Carn.a.C16.0.Oxo | 1.16 ( 0.58 - 2.33 ) | 0,758 | 1 ( 0.51 - 1.97 )    | 0,998  | 1.55 ( 0.82 - 2.96 ) | 0,248  |

|                                           |                      |       |                      |       |                      |        |
|-------------------------------------------|----------------------|-------|----------------------|-------|----------------------|--------|
| Carn.a.C16.1                              | 1.03 ( 0.52 - 2.06 ) | 0,956 | 1.01 ( 0.52 - 1.96 ) | 0,979 | 1.89 ( 1 - 3.56 )    | 0,109  |
| Carn.a.C16.2                              | 0.76 ( 0.39 - 1.5 )  | 0,537 | 0.84 ( 0.44 - 1.61 ) | 0,769 | 1.59 ( 0.86 - 2.96 ) | 0,212  |
| Carn.a.C18.0                              | 0.89 ( 0.45 - 1.76 ) | 0,804 | 0.66 ( 0.35 - 1.28 ) | 0,438 | 1.05 ( 0.56 - 1.96 ) | 0,889  |
| Carn.a.C18.1                              | 1.39 ( 0.69 - 2.77 ) | 0,465 | 1.07 ( 0.55 - 2.09 ) | 0,909 | 2.09 ( 1.11 - 3.94 ) | 0,072  |
| Carn.a.C18.2                              | 1.27 ( 0.65 - 2.51 ) | 0,585 | 1.09 ( 0.57 - 2.11 ) | 0,872 | 1.73 ( 0.93 - 3.22 ) | 0,151  |
| Carn.a.C18.2.OH                           | 1.07 ( 0.55 - 2.11 ) | 0,883 | 0.92 ( 0.48 - 1.75 ) | 0,872 | 1.19 ( 0.64 - 2.22 ) | 0,619  |
| Carn.a.C2.0                               | 2.36 ( 1.18 - 4.69 ) | 0,074 | 1.58 ( 0.82 - 3.07 ) | 0,407 | 3.16 ( 1.68 - 5.94 ) | 0,009* |
| Carn.a.C20.0                              | 1.56 ( 0.78 - 3.11 ) | 0,313 | 1.84 ( 0.96 - 3.55 ) | 0,237 | 1.31 ( 0.7 - 2.46 )  | 0,459  |
| Carn.a.C20.1                              | 1.29 ( 0.65 - 2.53 ) | 0,566 | 0.98 ( 0.51 - 1.87 ) | 0,971 | 1.59 ( 0.86 - 2.95 ) | 0,212  |
| Carn.a.C20.3                              | 1.13 ( 0.58 - 2.22 ) | 0,790 | 1.14 ( 0.6 - 2.16 )  | 0,814 | 1.22 ( 0.66 - 2.26 ) | 0,569  |
| Carn.a.C20.4                              | 1.4 ( 0.71 - 2.76 )  | 0,457 | 1.18 ( 0.62 - 2.27 ) | 0,769 | 1.46 ( 0.78 - 2.72 ) | 0,300  |
| Carn.a.C3.0                               | 1.79 ( 0.9 - 3.53 )  | 0,195 | 1.31 ( 0.68 - 2.52 ) | 0,635 | 1.79 ( 0.96 - 3.33 ) | 0,131  |
| Carn.a.C3.0.DC                            | 1.03 ( 0.51 - 2.05 ) | 0,958 | 0.89 ( 0.45 - 1.73 ) | 0,838 | 1.27 ( 0.67 - 2.4 )  | 0,510  |
| Carn.a.C4.0                               | 1.84 ( 0.94 - 3.63 ) | 0,169 | 1.37 ( 0.71 - 2.64 ) | 0,553 | 1.75 ( 0.94 - 3.25 ) | 0,142  |
| Carn.a.C5.0                               | 1.92 ( 0.97 - 3.79 ) | 0,148 | 1.64 ( 0.85 - 3.15 ) | 0,362 | 1.85 ( 0.99 - 3.45 ) | 0,116  |
| Carn.a.C6.0                               | 2.27 ( 1.14 - 4.53 ) | 0,087 | 1.26 ( 0.65 - 2.47 ) | 0,705 | 1.54 ( 0.82 - 2.92 ) | 0,248  |
| Carn.a.C6.0.OH                            | 1.39 ( 0.69 - 2.8 )  | 0,465 | 1.16 ( 0.59 - 2.27 ) | 0,793 | 1.75 ( 0.93 - 3.32 ) | 0,152  |
| Carn.a.C8.0                               | 1.8 ( 0.9 - 3.6 )    | 0,195 | 1.21 ( 0.62 - 2.35 ) | 0,769 | 1.31 ( 0.69 - 2.48 ) | 0,459  |
| Carn.a.C8.1                               | 1.64 ( 0.81 - 3.33 ) | 0,284 | 1.63 ( 0.83 - 3.22 ) | 0,402 | 1.96 ( 1.03 - 3.74 ) | 0,102  |
| Carn.a.C9.0                               | 2.19 ( 1.11 - 4.35 ) | 0,091 | 1.1 ( 0.57 - 2.14 )  | 0,872 | 1.42 ( 0.76 - 2.67 ) | 0,335  |
| Asn/Asp                                   | 0.35 ( 0.18 - 0.68 ) | 0,032 | 0.54 ( 0.28 - 1.04 ) | 0,237 | 0.5 ( 0.27 - 0.94 )  | 0,092  |
| Gln/Glu                                   | 0.57 ( 0.29 - 1.14 ) | 0,213 | 0.49 ( 0.25 - 0.95 ) | 0,203 | 0.31 ( 0.16 - 0.58 ) | 0,009* |
| NEFA18.1/NEFA18.0                         | 1 ( 0.5 - 2.02 )     | 0,998 | 0.83 ( 0.42 - 1.63 ) | 0,769 | 1.53 ( 0.8 - 2.92 )  | 0,270  |
| NEFA16.1/NEFA16.0                         | 1.07 ( 0.52 - 2.19 ) | 0,903 | 1.27 ( 0.64 - 2.54 ) | 0,705 | 1.23 ( 0.63 - 2.39 ) | 0,574  |
| PC.aa/PC.ae                               | 1.27 ( 0.63 - 2.56 ) | 0,591 | 1.49 ( 0.76 - 2.93 ) | 0,461 | 1.41 ( 0.74 - 2.69 ) | 0,355  |
| Lyso.PC.a/PC.aa                           | 0.71 ( 0.35 - 1.44 ) | 0,464 | 1.19 ( 0.61 - 2.32 ) | 0,769 | 1.3 ( 0.68 - 2.48 )  | 0,477  |
| (lyso.PC.a.C16.0 + lyso.PC.a.C18.0)/PC.aa | 0.65 ( 0.32 - 1.33 ) | 0,356 | 1.46 ( 0.74 - 2.88 ) | 0,478 | 1.55 ( 0.81 - 2.97 ) | 0,260  |
| (lyso.PC.a.C18.1 + lyso.PC.a.C18.2)       | 0.75 ( 0.37 - 1.51 ) | 0,533 | 0.64 ( 0.33 - 1.24 ) | 0,415 | 0.78 ( 0.41 - 1.46 ) | 0,486  |
| Carn.a.C.16.0/free Carn                   | 1.1 ( 0.55 - 2.2 )   | 0,837 | 1.34 ( 0.69 - 2.59 ) | 0,609 | 0.89 ( 0.47 - 1.68 ) | 0,743  |
| Carn.a.C2.0/Carn.a.C16.0                  | 1.43 ( 0.72 - 2.82 ) | 0,430 | 0.95 ( 0.49 - 1.84 ) | 0,927 | 1.47 ( 0.78 - 2.76 ) | 0,300  |

Values represent absolute differences in blood pressure (95% confidence interval) and corresponding p-values from linear regression models that reflect the difference in blood pressure (mmHg) per SDS increase in maternal early-pregnancy metabolite concentrations ( $\mu\text{mol/L}$ ) or metabolite ratio. Model includes gestational age at time of measurement, age, parity, pre-pregnancy body mass index, educational level, smoking and folic acid supplementation. AA amino acids, NEFA non-esterified fatty acids, PC.aa diacyl-phosphatidylcholines, PC.ae acyl-alkyl-phosphatidylcholines, lyso.PC.a acyl-lysophosphatidylcholines, lyso.PC.e alkyl-lysophosphatidylcholines, Carn.a acyl-carnitines, SM sphingomyelins.

<sup>a</sup> p-value corrected for multiple hypothesis testing using Benjamin-Hochberg FDR correction.

\*Statistically significant

**Table S6.** Associations of early-pregnancy individual metabolites with systolic blood pressure in early-, mid- and late pregnancy. Full model, additional adjustment for family history of hypertensive disorders.

|                   | <b>Differences in systolic blood pressure in mmHg (95% confidence interval)</b> |                            |                                 |                            |                                  |                            |
|-------------------|---------------------------------------------------------------------------------|----------------------------|---------------------------------|----------------------------|----------------------------------|----------------------------|
| <b>Metabolite</b> | <b>Early pregnancy</b><br>N = 803                                               | <b>P-value<sup>a</sup></b> | <b>Mid pregnancy</b><br>N = 793 | <b>P-value<sup>a</sup></b> | <b>Late pregnancy</b><br>N = 800 | <b>P-value<sup>a</sup></b> |
| Ala               | 3.01 ( 1.2 - 7.51 )                                                             | 0,095                      | 1.97 ( 0.8 - 4.85 )             | 0,378                      | 2.4 ( 1.09 - 5.3 )               | 0,143                      |
| Arg               | 4.92 ( 1.98 - 12.25 )                                                           | 0,009*                     | 2.47 ( 1 - 6.12 )               | 0,231                      | 3.19 ( 1.45 - 7 )                | 0,073                      |
| Asn               | 3.11 ( 1.24 - 7.81 )                                                            | 0,082                      | 1.07 ( 0.43 - 2.63 )            | 0,962                      | 2.92 ( 1.33 - 6.43 )             | 0,077                      |
| Asp               | 1.92 ( 0.76 - 4.83 )                                                            | 0,362                      | 2.7 ( 1.1 - 6.65 )              | 0,186                      | 2.98 ( 1.35 - 6.56 )             | 0,077                      |
| Cit               | 1.35 ( 0.51 - 3.57 )                                                            | 0,726                      | 0.87 ( 0.34 - 2.23 )            | 0,907                      | 1.16 ( 0.5 - 2.67 )              | 0,885                      |
| Gln               | 2.19 ( 0.88 - 5.43 )                                                            | 0,261                      | 1.01 ( 0.41 - 2.45 )            | 0,986                      | 0.93 ( 0.42 - 2.05 )             | 0,950                      |
| Glu               | 1.74 ( 0.69 - 4.39 )                                                            | 0,436                      | 3.41 ( 1.39 - 8.37 )            | 0,086                      | 3.03 ( 1.37 - 6.68 )             | 0,077                      |
| Gly               | 0.82 ( 0.33 - 2.04 )                                                            | 0,829                      | 0.97 ( 0.4 - 2.35 )             | 0,983                      | 1.3 ( 0.59 - 2.83 )              | 0,797                      |
| His               | 3.69 ( 1.45 - 9.4 )                                                             | 0,047*                     | 1.58 ( 0.63 - 3.93 )            | 0,566                      | 3.1 ( 1.4 - 6.86 )               | 0,077                      |
| Ile               | 3.23 ( 1.28 - 8.16 )                                                            | 0,074                      | 1.31 ( 0.53 - 3.25 )            | 0,778                      | 1.61 ( 0.72 - 3.56 )             | 0,498                      |
| Leu               | 2.78 ( 1.11 - 6.95 )                                                            | 0,128                      | 1.29 ( 0.53 - 3.15 )            | 0,778                      | 2.05 ( 0.94 - 4.49 )             | 0,262                      |
| Lys               | 0.78 ( 0.31 - 1.95 )                                                            | 0,771                      | 1.35 ( 0.55 - 3.35 )            | 0,717                      | 2.9 ( 1.32 - 6.38 )              | 0,077                      |
| Met               | 2.89 ( 1.16 - 7.23 )                                                            | 0,110                      | 1.46 ( 0.59 - 3.6 )             | 0,625                      | 1.78 ( 0.81 - 3.92 )             | 0,376                      |
| Orn               | 1.19 ( 0.47 - 3.05 )                                                            | 0,838                      | 1.23 ( 0.5 - 3.03 )             | 0,808                      | 1.94 ( 0.88 - 4.3 )              | 0,318                      |
| Phe               | 5.55 ( 2.26 - 13.59 )                                                           | 0,005*                     | 2.43 ( 1.01 - 5.88 )            | 0,225                      | 2.29 ( 1.05 - 4.97 )             | 0,159                      |
| Pro               | 2.29 ( 0.92 - 5.71 )                                                            | 0,234                      | 1.83 ( 0.75 - 4.45 )            | 0,418                      | 1.49 ( 0.68 - 3.27 )             | 0,581                      |
| Trp               | 7.33 ( 2.95 - 18.19 )                                                           | 0,001*                     | 2.81 ( 1.15 - 6.88 )            | 0,175                      | 2.89 ( 1.32 - 6.31 )             | 0,077                      |
| Ser               | 2.05 ( 0.82 - 5.12 )                                                            | 0,301                      | 1.14 ( 0.47 - 2.76 )            | 0,910                      | 2.4 ( 1.1 - 5.24 )               | 0,143                      |
| Thr               | 1.57 ( 0.61 - 4.04 )                                                            | 0,541                      | 1.56 ( 0.62 - 3.93 )            | 0,579                      | 2.17 ( 0.98 - 4.83 )             | 0,221                      |
| Tyr               | 5.34 ( 2.17 - 13.19 )                                                           | 0,005*                     | 2.06 ( 0.85 - 5.01 )            | 0,338                      | 2.65 ( 1.22 - 5.76 )             | 0,108                      |
| Val               | 5.35 ( 2.15 - 13.32 )                                                           | 0,006*                     | 1.89 ( 0.78 - 4.59 )            | 0,404                      | 2.61 ( 1.19 - 5.7 )              | 0,121                      |
| Cys               | 0.99 ( 0.38 - 2.55 )                                                            | 0,996                      | 1.12 ( 0.45 - 2.83 )            | 0,910                      | 1.49 ( 0.66 - 3.36 )             | 0,614                      |
| NEFA_14_0         | 1.64 ( 0.66 - 4.1 )                                                             | 0,496                      | 1.49 ( 0.61 - 3.61 )            | 0,605                      | 0.87 ( 0.4 - 1.92 )              | 0,885                      |
| NEFA_14_1         | 1.05 ( 0.42 - 2.65 )                                                            | 0,968                      | 1.29 ( 0.53 - 3.17 )            | 0,778                      | 1.02 ( 0.46 - 2.26 )             | 0,982                      |
| NEFA_15_0         | 1.7 ( 0.68 - 4.22 )                                                             | 0,450                      | 1.59 ( 0.66 - 3.84 )            | 0,549                      | 0.69 ( 0.32 - 1.51 )             | 0,616                      |
| NEFA_16_0         | 1.83 ( 0.73 - 4.61 )                                                            | 0,396                      | 1.8 ( 0.74 - 4.41 )             | 0,422                      | 0.89 ( 0.4 - 1.97 )              | 0,903                      |
| NEFA_16_1         | 0.97 ( 0.38 - 2.45 )                                                            | 0,990                      | 1.43 ( 0.58 - 3.52 )            | 0,648                      | 1.06 ( 0.48 - 2.35 )             | 0,960                      |
| NEFA_16_2         | 1.35 ( 0.53 - 3.41 )                                                            | 0,714                      | 1.47 ( 0.6 - 3.61 )             | 0,622                      | 0.91 ( 0.41 - 2.01 )             | 0,928                      |
| NEFA_17_0         | 1.48 ( 0.6 - 3.67 )                                                             | 0,585                      | 1.39 ( 0.58 - 3.34 )            | 0,689                      | 0.93 ( 0.42 - 2.02 )             | 0,947                      |
| NEFA_17_1         | 1.59 ( 0.64 - 3.95 )                                                            | 0,523                      | 1.45 ( 0.6 - 3.5 )              | 0,622                      | 0.88 ( 0.4 - 1.92 )              | 0,885                      |
| NEFA_17_2         | 1.73 ( 0.69 - 4.32 )                                                            | 0,436                      | 1.1 ( 0.45 - 2.69 )             | 0,928                      | 0.82 ( 0.37 - 1.81 )             | 0,871                      |
| NEFA_18_0         | 1.54 ( 0.61 - 3.91 )                                                            | 0,545                      | 1.24 ( 0.5 - 3.05 )             | 0,808                      | 0.82 ( 0.37 - 1.81 )             | 0,864                      |
| NEFA_18_1         | 1.38 ( 0.55 - 3.46 )                                                            | 0,679                      | 1.38 ( 0.57 - 3.36 )            | 0,694                      | 1.09 ( 0.5 - 2.41 )              | 0,938                      |
| NEFA_18_2         | 1.58 ( 0.64 - 3.93 )                                                            | 0,523                      | 1.12 ( 0.46 - 2.73 )            | 0,910                      | 0.72 ( 0.33 - 1.58 )             | 0,683                      |
| NEFA_18_3         | 1.94 ( 0.78 - 4.82 )                                                            | 0,345                      | 1.39 ( 0.57 - 3.36 )            | 0,689                      | 0.66 ( 0.3 - 1.44 )              | 0,546                      |
| NEFA_19_1         | 1.26 ( 0.51 - 3.11 )                                                            | 0,797                      | 1.08 ( 0.45 - 2.59 )            | 0,954                      | 0.84 ( 0.38 - 1.83 )             | 0,871                      |
| NEFA_20_1         | 1.6 ( 0.64 - 4 )                                                                | 0,523                      | 1.15 ( 0.47 - 2.81 )            | 0,907                      | 1.17 ( 0.53 - 2.58 )             | 0,884                      |
| NEFA_20_2         | 1.25 ( 0.5 - 3.12 )                                                             | 0,797                      | 1.29 ( 0.53 - 3.14 )            | 0,778                      | 1.17 ( 0.53 - 2.59 )             | 0,884                      |
| NEFA_20_3         | 2.73 ( 1.06 - 7.04 )                                                            | 0,154                      | 3.11 ( 1.25 - 7.77 )            | 0,141                      | 1.81 ( 0.8 - 4.08 )              | 0,376                      |
| NEFA_20_4         | 2.13 ( 0.85 - 5.32 )                                                            | 0,286                      | 1.95 ( 0.8 - 4.76 )             | 0,378                      | 1.67 ( 0.76 - 3.66 )             | 0,449                      |

|                 |                        |        |                       |        |                       |        |
|-----------------|------------------------|--------|-----------------------|--------|-----------------------|--------|
| NEFA_20_5       | 2.4 ( 0.95 - 6.06 )    | 0,202  | 1.5 ( 0.61 - 3.69 )   | 0,602  | 1.68 ( 0.76 - 3.69 )  | 0,449  |
| NEFA_22_3       | 1.48 ( 0.59 - 3.73 )   | 0,588  | 2.61 ( 1.07 - 6.36 )  | 0,196  | 2.48 ( 1.12 - 5.5 )   | 0,143  |
| NEFA_22_4       | 2.57 ( 1 - 6.6 )       | 0,173  | 2.9 ( 1.17 - 7.21 )   | 0,175  | 2.06 ( 0.92 - 4.64 )  | 0,281  |
| NEFA_22_5       | 2.25 ( 0.89 - 5.66 )   | 0,255  | 1.83 ( 0.75 - 4.49 )  | 0,418  | 1.63 ( 0.73 - 3.61 )  | 0,489  |
| NEFA_22_6       | 1.75 ( 0.69 - 4.41 )   | 0,436  | 1.28 ( 0.52 - 3.16 )  | 0,784  | 1.26 ( 0.57 - 2.8 )   | 0,828  |
| NEFA_24_0       | 2.21 ( 0.9 - 5.47 )    | 0,255  | 2 ( 0.82 - 4.85 )     | 0,365  | 0.85 ( 0.39 - 1.84 )  | 0,882  |
| NEFA_24_1       | 1.03 ( 0.41 - 2.56 )   | 0,990  | 0.72 ( 0.3 - 1.76 )   | 0,694  | 0.95 ( 0.43 - 2.07 )  | 0,960  |
| NEFA_24_2       | 1 ( 0.39 - 2.55 )      | 0,996  | 1.45 ( 0.59 - 3.56 )  | 0,629  | 1.44 ( 0.65 - 3.19 )  | 0,627  |
| NEFA_24_4       | 3.19 ( 1.28 - 7.95 )   | 0,074  | 2.84 ( 1.17 - 6.89 )  | 0,175  | 2.6 ( 1.19 - 5.7 )    | 0,121  |
| NEFA_24_5       | 3.58 ( 1.42 - 8.99 )   | 0,047* | 2.52 ( 1.03 - 6.16 )  | 0,216  | 3.83 ( 1.74 - 8.43 )  | 0,022* |
| NEFA_26_0       | 3.58 ( 1.45 - 8.81 )   | 0,043* | 1.76 ( 0.73 - 4.25 )  | 0,439  | 1.58 ( 0.73 - 3.44 )  | 0,504  |
| NEFA_26_1       | 1.95 ( 0.78 - 4.89 )   | 0,345  | 2.47 ( 1.01 - 6.07 )  | 0,225  | 1.82 ( 0.83 - 4.01 )  | 0,359  |
| NEFA_26_2       | 1.38 ( 0.53 - 3.55 )   | 0,698  | 1.72 ( 0.69 - 4.27 )  | 0,471  | 1.35 ( 0.6 - 3.02 )   | 0,732  |
| lyso.PC.a.C14.0 | 14.01 ( 5.58 - 35.18 ) | 0,000* | 8.56 ( 3.45 - 21.29 ) | 0,001* | 5.59 ( 2.51 - 12.47 ) | 0,006* |
| lyso.PC.a.C16.0 | 3.55 ( 1.38 - 9.12 )   | 0,055  | 4.8 ( 1.92 - 11.99 )  | 0,030* | 2.55 ( 1.13 - 5.74 )  | 0,143  |
| lyso.PC.a.C16.1 | 5.17 ( 1.97 - 13.58 )  | 0,011* | 6.16 ( 2.43 - 15.62 ) | 0,010* | 4.85 ( 2.13 - 11.01 ) | 0,012* |
| lyso.PC.a.C18.0 | 1.88 ( 0.73 - 4.85 )   | 0,389  | 3.68 ( 1.48 - 9.18 )  | 0,076  | 1.69 ( 0.76 - 3.79 )  | 0,449  |
| lyso.PC.a.C18.1 | 5.25 ( 2.1 - 13.12 )   | 0,006* | 2.91 ( 1.18 - 7.16 )  | 0,175  | 1.86 ( 0.84 - 4.1 )   | 0,343  |
| lyso.PC.a.C18.2 | 5.09 ( 2.03 - 12.79 )  | 0,008* | 2.07 ( 0.85 - 5.05 )  | 0,338  | 1.28 ( 0.58 - 2.81 )  | 0,815  |
| lyso.PC.a.C18.3 | 5.83 ( 2.41 - 14.14 )  | 0,003* | 2.12 ( 0.89 - 5.08 )  | 0,309  | 2.8 ( 1.3 - 6.03 )    | 0,078  |
| lyso.PC.a.C20.3 | 8.42 ( 3.39 - 20.92 )  | 0,000* | 6.98 ( 2.86 - 17.05 ) | 0,002* | 4.99 ( 2.27 - 10.94 ) | 0,007* |
| lyso.PC.a.C20.4 | 5.6 ( 2.23 - 14.09 )   | 0,005* | 4.74 ( 1.94 - 11.59 ) | 0,030* | 2.39 ( 1.09 - 5.28 )  | 0,143  |
| lyso.PC.a.C20.5 | 2.54 ( 1 - 6.41 )      | 0,173  | 1.26 ( 0.52 - 3.06 )  | 0,786  | 2.23 ( 1.02 - 4.86 )  | 0,179  |
| lyso.PC.a.C22.6 | 2.78 ( 1.1 - 7 )       | 0,129  | 1.61 ( 0.66 - 3.94 )  | 0,542  | 1.21 ( 0.55 - 2.67 )  | 0,871  |
| lyso.PC.e.C16.0 | 2.69 ( 1.06 - 6.83 )   | 0,151  | 2.84 ( 1.15 - 7.03 )  | 0,175  | 1.88 ( 0.84 - 4.21 )  | 0,337  |
| lyso.PC.e.C18.0 | 0.86 ( 0.34 - 2.15 )   | 0,852  | 1.7 ( 0.69 - 4.14 )   | 0,471  | 1.23 ( 0.56 - 2.71 )  | 0,864  |
| lyso.PC.e.C18.1 | 2.57 ( 0.99 - 6.67 )   | 0,184  | 1.3 ( 0.52 - 3.29 )   | 0,778  | 1.57 ( 0.69 - 3.54 )  | 0,537  |
| PC.aa.C30.0     | 6.31 ( 2.54 - 15.68 )  | 0,003* | 3.12 ( 1.27 - 7.64 )  | 0,141  | 2.44 ( 1.11 - 5.37 )  | 0,143  |
| PC.aa.C30.3     | 1.14 ( 0.46 - 2.87 )   | 0,879  | 1.8 ( 0.74 - 4.39 )   | 0,418  | 0.87 ( 0.39 - 1.92 )  | 0,885  |
| PC.aa.C32.0     | 3.92 ( 1.54 - 9.94 )   | 0,038* | 2.67 ( 1.08 - 6.6 )   | 0,189  | 1.84 ( 0.82 - 4.11 )  | 0,359  |
| PC.aa.C32.1     | 5.78 ( 2.27 - 14.72 )  | 0,005* | 3.98 ( 1.61 - 9.86 )  | 0,060  | 4.19 ( 1.89 - 9.3 )   | 0,017* |
| PC.aa.C32.2     | 6.4 ( 2.55 - 16.06 )   | 0,003* | 2.77 ( 1.13 - 6.78 )  | 0,176  | 2.51 ( 1.14 - 5.53 )  | 0,143  |
| PC.aa.C32.3     | 1.4 ( 0.54 - 3.65 )    | 0,679  | 1.79 ( 0.71 - 4.51 )  | 0,442  | 1.16 ( 0.52 - 2.62 )  | 0,885  |
| PC.aa.C34.1     | 3.26 ( 1.29 - 8.26 )   | 0,074  | 3.39 ( 1.39 - 8.27 )  | 0,086  | 2.99 ( 1.35 - 6.6 )   | 0,077  |
| PC.aa.C34.2     | 2.24 ( 0.88 - 5.72 )   | 0,261  | 1.88 ( 0.77 - 4.62 )  | 0,411  | 1.46 ( 0.66 - 3.24 )  | 0,616  |
| PC.aa.C34.3     | 3.26 ( 1.29 - 8.28 )   | 0,074  | 2.02 ( 0.82 - 4.98 )  | 0,365  | 1.92 ( 0.87 - 4.28 )  | 0,322  |
| PC.aa.C34.4     | 8.03 ( 3.28 - 19.67 )  | 0,000* | 3.83 ( 1.58 - 9.27 )  | 0,060  | 2.77 ( 1.27 - 6.05 )  | 0,093  |
| PC.aa.C34.5     | 4.4 ( 1.71 - 11.32 )   | 0,023* | 1.87 ( 0.74 - 4.72 )  | 0,418  | 1.79 ( 0.8 - 4.04 )   | 0,378  |
| PC.aa.C36.0     | 1.21 ( 0.47 - 3.12 )   | 0,837  | 1.69 ( 0.67 - 4.28 )  | 0,498  | 1.17 ( 0.52 - 2.64 )  | 0,884  |
| PC.aa.C36.1     | 4.15 ( 1.66 - 10.34 )  | 0,024* | 2.41 ( 0.98 - 5.9 )   | 0,231  | 2.31 ( 1.05 - 5.1 )   | 0,161  |
| PC.aa.C36.2     | 2.33 ( 0.91 - 5.96 )   | 0,238  | 1.78 ( 0.72 - 4.41 )  | 0,439  | 1.35 ( 0.61 - 3.02 )  | 0,732  |
| PC.aa.C36.3     | 3.25 ( 1.27 - 8.31 )   | 0,077  | 2.76 ( 1.11 - 6.84 )  | 0,182  | 2.58 ( 1.16 - 5.72 )  | 0,134  |
| PC.aa.C36.4     | 3.47 ( 1.38 - 8.73 )   | 0,055  | 3.7 ( 1.51 - 9.07 )   | 0,076  | 2.47 ( 1.11 - 5.48 )  | 0,143  |

|              |                       |        |                       |        |                      |        |
|--------------|-----------------------|--------|-----------------------|--------|----------------------|--------|
| PC.aa.C36.5  | 4.62 ( 1.84 - 11.59 ) | 0,014* | 1.82 ( 0.74 - 4.5 )   | 0,418  | 3.06 ( 1.38 - 6.74 ) | 0,077  |
| PC.aa.C36.6  | 4.6 ( 1.82 - 11.68 )  | 0,015* | 2.3 ( 0.92 - 5.72 )   | 0,279  | 2.98 ( 1.34 - 6.63 ) | 0,077  |
| PC.aa.C38.0  | 1.16 ( 0.44 - 3.01 )  | 0,871  | 1.1 ( 0.43 - 2.81 )   | 0,936  | 0.98 ( 0.43 - 2.21 ) | 0,977  |
| PC.aa.C38.2  | 2.69 ( 1.04 - 6.93 )  | 0,158  | 2.73 ( 1.09 - 6.85 )  | 0,186  | 2.44 ( 1.09 - 5.49 ) | 0,143  |
| PC.aa.C38.3  | 3.97 ( 1.54 - 10.23 ) | 0,038* | 4.82 ( 1.91 - 12.14 ) | 0,030* | 4.18 ( 1.86 - 9.41 ) | 0,017* |
| PC.aa.C38.4  | 2.44 ( 0.96 - 6.17 )  | 0,196  | 3.66 ( 1.48 - 9.03 )  | 0,076  | 2.43 ( 1.09 - 5.43 ) | 0,143  |
| PC.aa.C38.5  | 2.6 ( 1.04 - 6.5 )    | 0,158  | 2.67 ( 1.1 - 6.51 )   | 0,186  | 3.39 ( 1.54 - 7.43 ) | 0,055  |
| PC.aa.C38.6  | 1.51 ( 0.57 - 3.96 )  | 0,588  | 1.53 ( 0.6 - 3.91 )   | 0,602  | 1.87 ( 0.82 - 4.26 ) | 0,359  |
| PC.aa.C40.0  | 1.76 ( 0.68 - 4.59 )  | 0,441  | 0.97 ( 0.38 - 2.48 )  | 0,983  | 0.91 ( 0.4 - 2.07 )  | 0,940  |
| PC.aa.C40.1  | 1.77 ( 0.69 - 4.51 )  | 0,436  | 2 ( 0.81 - 4.98 )     | 0,378  | 1.15 ( 0.52 - 2.55 ) | 0,885  |
| PC.aa.C40.2  | 3.9 ( 1.55 - 9.81 )   | 0,038* | 1.74 ( 0.71 - 4.27 )  | 0,456  | 2.37 ( 1.08 - 5.23 ) | 0,144  |
| PC.aa.C40.3  | 2.54 ( 1.01 - 6.39 )  | 0,173  | 1.91 ( 0.77 - 4.72 )  | 0,404  | 2.43 ( 1.1 - 5.39 )  | 0,143  |
| PC.aa.C40.4  | 3.78 ( 1.5 - 9.52 )   | 0,040* | 4.47 ( 1.82 - 10.97 ) | 0,032* | 4.1 ( 1.86 - 9.03 )  | 0,017* |
| PC.aa.C40.5  | 2.12 ( 0.86 - 5.25 )  | 0,285  | 3.59 ( 1.49 - 8.65 )  | 0,076  | 3.22 ( 1.47 - 7.02 ) | 0,070  |
| PC.aa.C40.6  | 2.11 ( 0.82 - 5.44 )  | 0,301  | 2.01 ( 0.8 - 5.06 )   | 0,378  | 2.43 ( 1.08 - 5.48 ) | 0,144  |
| PC.aa.C42.0  | 1.12 ( 0.45 - 2.82 )  | 0,889  | 1.04 ( 0.42 - 2.57 )  | 0,983  | 1.6 ( 0.73 - 3.51 )  | 0,494  |
| PC.aa.C42.5  | 1.4 ( 0.56 - 3.51 )   | 0,669  | 0.97 ( 0.4 - 2.38 )   | 0,983  | 1.29 ( 0.59 - 2.83 ) | 0,800  |
| PC.aa.C43.6  | 0.86 ( 0.34 - 2.18 )  | 0,852  | 1.29 ( 0.52 - 3.21 )  | 0,778  | 1.2 ( 0.54 - 2.66 )  | 0,871  |
| PC.aa.C44.12 | 1.31 ( 0.51 - 3.36 )  | 0,756  | 1.77 ( 0.71 - 4.41 )  | 0,448  | 1.6 ( 0.71 - 3.59 )  | 0,504  |
| PC.ae.C30.0  | 3.73 ( 1.49 - 9.38 )  | 0,040* | 2.34 ( 0.95 - 5.75 )  | 0,255  | 1.92 ( 0.87 - 4.23 ) | 0,322  |
| PC.ae.C32.0  | 2.6 ( 1.03 - 6.55 )   | 0,165  | 2.57 ( 1.05 - 6.28 )  | 0,205  | 1.96 ( 0.89 - 4.33 ) | 0,302  |
| PC.ae.C32.1  | 1.97 ( 0.77 - 5.07 )  | 0,347  | 2.55 ( 1.03 - 6.33 )  | 0,216  | 1.2 ( 0.53 - 2.69 )  | 0,871  |
| PC.ae.C32.2  | 1.64 ( 0.65 - 4.13 )  | 0,497  | 1.46 ( 0.6 - 3.57 )   | 0,622  | 0.78 ( 0.35 - 1.72 ) | 0,815  |
| PC.ae.C34.0  | 2.83 ( 1.12 - 7.12 )  | 0,126  | 2.57 ( 1.05 - 6.28 )  | 0,205  | 1.73 ( 0.78 - 3.82 ) | 0,406  |
| PC.ae.C34.1  | 2.24 ( 0.89 - 5.68 )  | 0,258  | 2.11 ( 0.86 - 5.19 )  | 0,327  | 1.86 ( 0.84 - 4.11 ) | 0,345  |
| PC.ae.C34.2  | 1.6 ( 0.62 - 4.14 )   | 0,527  | 1.5 ( 0.6 - 3.76 )    | 0,605  | 1.13 ( 0.5 - 2.56 )  | 0,897  |
| PC.ae.C34.3  | 1.59 ( 0.64 - 3.96 )  | 0,523  | 1.58 ( 0.65 - 3.82 )  | 0,550  | 0.83 ( 0.38 - 1.82 ) | 0,871  |
| PC.ae.C34.4  | 1.79 ( 0.7 - 4.56 )   | 0,424  | 1.36 ( 0.55 - 3.35 )  | 0,717  | 1.45 ( 0.65 - 3.23 ) | 0,623  |
| PC.ae.C36.0  | 0.99 ( 0.39 - 2.52 )  | 0,996  | 1.82 ( 0.74 - 4.47 )  | 0,418  | 1.12 ( 0.5 - 2.48 )  | 0,919  |
| PC.ae.C36.1  | 1.83 ( 0.72 - 4.63 )  | 0,396  | 2.44 ( 0.99 - 6.03 )  | 0,231  | 2.54 ( 1.15 - 5.62 ) | 0,140  |
| PC.ae.C36.2  | 1.08 ( 0.41 - 2.8 )   | 0,948  | 1.02 ( 0.41 - 2.54 )  | 0,986  | 1.04 ( 0.46 - 2.33 ) | 0,974  |
| PC.ae.C36.3  | 1.82 ( 0.72 - 4.62 )  | 0,404  | 1.74 ( 0.7 - 4.32 )   | 0,456  | 1.79 ( 0.81 - 3.98 ) | 0,375  |
| PC.ae.C36.4  | 2.45 ( 0.98 - 6.09 )  | 0,186  | 4.13 ( 1.7 - 10.03 )  | 0,045* | 2.15 ( 0.98 - 4.71 ) | 0,220  |
| PC.ae.C36.5  | 1.96 ( 0.79 - 4.87 )  | 0,341  | 2.18 ( 0.9 - 5.3 )    | 0,298  | 1.4 ( 0.64 - 3.05 )  | 0,663  |
| PC.ae.C38.0  | 1.6 ( 0.62 - 4.15 )   | 0,527  | 1.02 ( 0.4 - 2.56 )   | 0,986  | 1.55 ( 0.69 - 3.51 ) | 0,543  |
| PC.ae.C38.2  | 1.92 ( 0.74 - 5.01 )  | 0,376  | 2.3 ( 0.91 - 5.82 )   | 0,282  | 1.28 ( 0.56 - 2.9 )  | 0,817  |
| PC.ae.C38.3  | 2.48 ( 0.97 - 6.34 )  | 0,196  | 3.57 ( 1.43 - 8.91 )  | 0,084  | 3.1 ( 1.39 - 6.93 )  | 0,077  |
| PC.ae.C38.4  | 1.89 ( 0.76 - 4.69 )  | 0,362  | 3.04 ( 1.26 - 7.37 )  | 0,141  | 1.9 ( 0.87 - 4.17 )  | 0,322  |
| PC.ae.C38.5  | 1.62 ( 0.65 - 4.06 )  | 0,503  | 2.22 ( 0.91 - 5.43 )  | 0,286  | 1.53 ( 0.7 - 3.38 )  | 0,543  |
| PC.ae.C38.6  | 1.68 ( 0.66 - 4.28 )  | 0,480  | 1.74 ( 0.7 - 4.36 )   | 0,461  | 1.56 ( 0.7 - 3.48 )  | 0,534  |
| PC.ae.C40.0  | 1.73 ( 0.65 - 4.59 )  | 0,474  | 1.13 ( 0.44 - 2.91 )  | 0,910  | 1.45 ( 0.62 - 3.35 ) | 0,653  |
| PC.ae.C40.1  | 2.87 ( 1.09 - 7.52 )  | 0,135  | 1.3 ( 0.51 - 3.34 )   | 0,781  | 1.69 ( 0.74 - 3.85 ) | 0,462  |
| PC.ae.C40.2  | 1.19 ( 0.46 - 3.06 )  | 0,838  | 0.95 ( 0.38 - 2.38 )  | 0,968  | 2.09 ( 0.94 - 4.63 ) | 0,262  |
| PC.ae.C40.3  | 2.02 ( 0.78 - 5.22 )  | 0,341  | 2.22 ( 0.88 - 5.6 )   | 0,309  | 1.61 ( 0.71 - 3.63 ) | 0,504  |



|              |                      |       |                      |       |                      |        |
|--------------|----------------------|-------|----------------------|-------|----------------------|--------|
| PC.ae.C40.4  | 2.16 ( 0.85 - 5.47 ) | 0,285 | 3.51 ( 1.42 - 8.65 ) | 0,084 | 2.04 ( 0.92 - 4.56 ) | 0,281  |
| PC.ae.C40.5  | 1.12 ( 0.44 - 2.85 ) | 0,889 | 1.53 ( 0.62 - 3.8 )  | 0,586 | 1.59 ( 0.71 - 3.56 ) | 0,504  |
| PC.ae.C40.6  | 1 ( 0.39 - 2.58 )    | 0,996 | 1.21 ( 0.48 - 3.03 ) | 0,842 | 1.46 ( 0.65 - 3.3 )  | 0,616  |
| PC.ae.C42.1  | 2.06 ( 0.79 - 5.37 ) | 0,333 | 2.18 ( 0.86 - 5.55 ) | 0,327 | 1.54 ( 0.68 - 3.5 )  | 0,556  |
| PC.ae.C42.3  | 0.84 ( 0.32 - 2.2 )  | 0,846 | 0.63 ( 0.25 - 1.59 ) | 0,566 | 1.15 ( 0.51 - 2.61 ) | 0,885  |
| PC.ae.C42.4  | 2.14 ( 0.84 - 5.45 ) | 0,288 | 2.16 ( 0.87 - 5.34 ) | 0,321 | 1.91 ( 0.86 - 4.25 ) | 0,329  |
| PC.ae.C42.5  | 1.22 ( 0.48 - 3.11 ) | 0,829 | 1.72 ( 0.69 - 4.26 ) | 0,470 | 1.77 ( 0.79 - 3.95 ) | 0,389  |
| PC.ae.C42.6  | 0.99 ( 0.39 - 2.53 ) | 0,996 | 0.93 ( 0.37 - 2.33 ) | 0,962 | 1.14 ( 0.51 - 2.53 ) | 0,892  |
| SM.a.C30.1   | 2.2 ( 0.87 - 5.55 )  | 0,269 | 2.48 ( 1.01 - 6.08 ) | 0,225 | 1.88 ( 0.86 - 4.11 ) | 0,331  |
| SM.a.C32.1   | 1.81 ( 0.71 - 4.61 ) | 0,408 | 2.39 ( 0.97 - 5.87 ) | 0,243 | 1.99 ( 0.9 - 4.41 )  | 0,302  |
| SM.a.C32.2   | 1.87 ( 0.71 - 4.95 ) | 0,403 | 3.19 ( 1.25 - 8.14 ) | 0,141 | 3.21 ( 1.42 - 7.25 ) | 0,077  |
| SM.a.C33.1   | 1.01 ( 0.39 - 2.6 )  | 0,996 | 1.53 ( 0.62 - 3.79 ) | 0,586 | 1.27 ( 0.57 - 2.84 ) | 0,817  |
| SM.a.C34.1   | 1.01 ( 0.39 - 2.63 ) | 0,996 | 1.64 ( 0.66 - 4.11 ) | 0,529 | 1.31 ( 0.58 - 2.96 ) | 0,797  |
| SM.a.C34.2   | 1.13 ( 0.42 - 3.1 )  | 0,889 | 2.03 ( 0.77 - 5.36 ) | 0,402 | 1.71 ( 0.73 - 3.98 ) | 0,462  |
| SM.a.C35.0   | 0.77 ( 0.3 - 1.96 )  | 0,771 | 0.88 ( 0.36 - 2.18 ) | 0,910 | 1.26 ( 0.56 - 2.8 )  | 0,828  |
| SM.a.C35.1   | 0.38 ( 0.14 - 0.99 ) | 0,173 | 0.84 ( 0.33 - 2.11 ) | 0,854 | 0.74 ( 0.33 - 1.67 ) | 0,742  |
| SM.a.C36.1   | 0.79 ( 0.3 - 2.09 )  | 0,797 | 1.54 ( 0.6 - 3.94 )  | 0,602 | 1.07 ( 0.47 - 2.47 ) | 0,950  |
| SM.a.C36.2   | 0.44 ( 0.16 - 1.22 ) | 0,297 | 1.22 ( 0.46 - 3.23 ) | 0,842 | 0.91 ( 0.39 - 2.15 ) | 0,941  |
| SM.a.C36.3   | 0.77 ( 0.28 - 2.08 ) | 0,786 | 0.89 ( 0.34 - 2.32 ) | 0,910 | 1.01 ( 0.43 - 2.33 ) | 0,996  |
| SM.a.C37.1   | 1.2 ( 0.46 - 3.1 )   | 0,838 | 1.27 ( 0.51 - 3.18 ) | 0,786 | 2.15 ( 0.97 - 4.77 ) | 0,226  |
| SM.a.C38.2   | 1.26 ( 0.49 - 3.28 ) | 0,797 | 1.89 ( 0.76 - 4.67 ) | 0,411 | 1.28 ( 0.57 - 2.86 ) | 0,815  |
| SM.a.C38.3   | 1.24 ( 0.49 - 3.16 ) | 0,810 | 1.5 ( 0.61 - 3.66 )  | 0,602 | 0.98 ( 0.44 - 2.16 ) | 0,977  |
| SM.a.C39.1   | 2.16 ( 0.82 - 5.73 ) | 0,301 | 2.25 ( 0.88 - 5.73 ) | 0,309 | 2.32 ( 1.02 - 5.27 ) | 0,179  |
| SM.a.C39.2   | 0.73 ( 0.28 - 1.91 ) | 0,707 | 0.76 ( 0.3 - 1.91 )  | 0,776 | 1.22 ( 0.54 - 2.73 ) | 0,871  |
| SM.a.C40.2   | 1.88 ( 0.73 - 4.83 ) | 0,387 | 2.84 ( 1.15 - 7.02 ) | 0,175 | 2.04 ( 0.92 - 4.53 ) | 0,281  |
| SM.a.C40.5   | 3.36 ( 1.34 - 8.43 ) | 0,061 | 2.02 ( 0.82 - 4.96 ) | 0,365 | 4.01 ( 1.84 - 8.76 ) | 0,017* |
| SM.a.C41.1   | 3.04 ( 1.2 - 7.68 )  | 0,095 | 2 ( 0.82 - 4.88 )    | 0,365 | 1.79 ( 0.82 - 3.92 ) | 0,370  |
| SM.a.C41.2   | 1.31 ( 0.51 - 3.35 ) | 0,762 | 1.02 ( 0.41 - 2.52 ) | 0,986 | 1.97 ( 0.89 - 4.35 ) | 0,302  |
| SM.a.C42.1   | 1.56 ( 0.62 - 3.95 ) | 0,536 | 1.09 ( 0.44 - 2.67 ) | 0,948 | 1.34 ( 0.61 - 2.96 ) | 0,732  |
| SM.a.C42.2   | 1.13 ( 0.43 - 2.95 ) | 0,889 | 0.88 ( 0.35 - 2.22 ) | 0,910 | 1.48 ( 0.65 - 3.35 ) | 0,616  |
| SM.a.C42.3   | 0.99 ( 0.38 - 2.59 ) | 0,996 | 1.56 ( 0.62 - 3.95 ) | 0,579 | 1.59 ( 0.71 - 3.6 )  | 0,510  |
| SM.a.C42.4   | 2.42 ( 0.96 - 6.07 ) | 0,196 | 2.79 ( 1.14 - 6.84 ) | 0,175 | 1.98 ( 0.89 - 4.39 ) | 0,302  |
| SM.a.C42.6   | 1.96 ( 0.75 - 5.1 )  | 0,362 | 1.96 ( 0.77 - 4.95 ) | 0,402 | 1.96 ( 0.86 - 4.46 ) | 0,322  |
| SM.a.C43.1   | 1.57 ( 0.61 - 4.07 ) | 0,541 | 1.06 ( 0.42 - 2.67 ) | 0,966 | 1.05 ( 0.47 - 2.35 ) | 0,969  |
| SM.a.C43.2   | 1.21 ( 0.47 - 3.08 ) | 0,836 | 1.24 ( 0.5 - 3.09 )  | 0,808 | 0.96 ( 0.43 - 2.14 ) | 0,974  |
| SM.a.C44.6   | 1.42 ( 0.55 - 3.66 ) | 0,666 | 1.65 ( 0.66 - 4.17 ) | 0,526 | 1.9 ( 0.84 - 4.27 )  | 0,337  |
| SM.e.C36.2   | 0.47 ( 0.18 - 1.27 ) | 0,333 | 0.73 ( 0.28 - 1.86 ) | 0,717 | 0.9 ( 0.39 - 2.05 )  | 0,921  |
| SM.e.C38.3   | 0.94 ( 0.37 - 2.37 ) | 0,960 | 1.26 ( 0.52 - 3.06 ) | 0,792 | 0.99 ( 0.45 - 2.18 ) | 0,996  |
| SM.e.C40.5   | 1.48 ( 0.6 - 3.68 )  | 0,588 | 1.85 ( 0.76 - 4.49 ) | 0,418 | 1.11 ( 0.51 - 2.42 ) | 0,921  |
| Carn         | 1.12 ( 0.43 - 2.87 ) | 0,897 | 1.88 ( 0.76 - 4.65 ) | 0,411 | 2.43 ( 1.1 - 5.38 )  | 0,143  |
| Carn.a.C10.0 | 0.47 ( 0.19 - 1.18 ) | 0,288 | 0.83 ( 0.34 - 2.05 ) | 0,842 | 1.05 ( 0.47 - 2.32 ) | 0,969  |
| Carn.a.C10.1 | 0.54 ( 0.21 - 1.36 ) | 0,389 | 0.59 ( 0.24 - 1.46 ) | 0,473 | 0.81 ( 0.36 - 1.81 ) | 0,864  |
| Carn.a.C12.0 | 0.68 ( 0.27 - 1.69 ) | 0,588 | 0.81 ( 0.33 - 1.99 ) | 0,808 | 1.16 ( 0.53 - 2.57 ) | 0,884  |
| Carn.a.C14.1 | 0.6 ( 0.24 - 1.5 )   | 0,480 | 0.64 ( 0.26 - 1.57 ) | 0,567 | 1 ( 0.45 - 2.2 )     | 0,998  |
| Carn.a.C14.2 | 0.52 ( 0.21 - 1.28 ) | 0,345 | 0.55 ( 0.23 - 1.34 ) | 0,418 | 0.97 ( 0.44 - 2.12 ) | 0,974  |

|                                           |                      |        |                      |       |                      |       |
|-------------------------------------------|----------------------|--------|----------------------|-------|----------------------|-------|
| Carn.a.C15.0                              | 0.84 ( 0.34 - 2.11 ) | 0,838  | 0.96 ( 0.4 - 2.34 )  | 0,983 | 1.67 ( 0.76 - 3.66 ) | 0,449 |
| Carn.a.C16.0                              | 0.7 ( 0.28 - 1.73 )  | 0,630  | 0.8 ( 0.33 - 1.96 )  | 0,806 | 0.84 ( 0.38 - 1.86 ) | 0,882 |
| Carn.a.C16.0.Oxo                          | 1.06 ( 0.42 - 2.7 )  | 0,960  | 0.94 ( 0.38 - 2.33 ) | 0,962 | 1 ( 0.44 - 2.24 )    | 0,998 |
| Carn.a.C16.1                              | 0.34 ( 0.13 - 0.84 ) | 0,096  | 0.55 ( 0.22 - 1.35 ) | 0,418 | 1.17 ( 0.53 - 2.6 )  | 0,884 |
| Carn.a.C16.2                              | 0.55 ( 0.22 - 1.37 ) | 0,396  | 0.63 ( 0.26 - 1.54 ) | 0,551 | 1.17 ( 0.54 - 2.56 ) | 0,884 |
| Carn.a.C18.0                              | 1.17 ( 0.47 - 2.92 ) | 0,848  | 0.5 ( 0.21 - 1.21 )  | 0,365 | 0.98 ( 0.45 - 2.14 ) | 0,977 |
| Carn.a.C18.1                              | 0.52 ( 0.21 - 1.32 ) | 0,362  | 0.72 ( 0.29 - 1.78 ) | 0,694 | 1.41 ( 0.64 - 3.14 ) | 0,658 |
| Carn.a.C18.2                              | 0.66 ( 0.27 - 1.65 ) | 0,567  | 0.9 ( 0.37 - 2.18 )  | 0,910 | 0.93 ( 0.42 - 2.03 ) | 0,949 |
| Carn.a.C18.2.OH                           | 0.9 ( 0.36 - 2.23 )  | 0,898  | 0.86 ( 0.35 - 2.06 ) | 0,872 | 1.19 ( 0.54 - 2.62 ) | 0,871 |
| Carn.a.C2.0                               | 1.65 ( 0.65 - 4.15 ) | 0,496  | 1.78 ( 0.73 - 4.36 ) | 0,430 | 1.82 ( 0.82 - 4.02 ) | 0,361 |
| Carn.a.C20.0                              | 1.4 ( 0.56 - 3.51 )  | 0,669  | 1.84 ( 0.76 - 4.45 ) | 0,418 | 0.83 ( 0.38 - 1.83 ) | 0,871 |
| Carn.a.C20.1                              | 1.55 ( 0.63 - 3.82 ) | 0,535  | 1.02 ( 0.42 - 2.44 ) | 0,986 | 1.37 ( 0.63 - 2.97 ) | 0,694 |
| Carn.a.C20.3                              | 0.88 ( 0.36 - 2.17 ) | 0,883  | 1.23 ( 0.51 - 2.94 ) | 0,808 | 0.69 ( 0.32 - 1.5 )  | 0,616 |
| Carn.a.C20.4                              | 0.75 ( 0.3 - 1.85 )  | 0,714  | 1.01 ( 0.42 - 2.44 ) | 0,986 | 0.93 ( 0.43 - 2.05 ) | 0,950 |
| Carn.a.C3.0                               | 2.84 ( 1.14 - 7.05 ) | 0,115  | 2.23 ( 0.93 - 5.39 ) | 0,279 | 2.26 ( 1.04 - 4.95 ) | 0,169 |
| Carn.a.C3.0.DC                            | 0.79 ( 0.31 - 2 )    | 0,797  | 1.06 ( 0.43 - 2.63 ) | 0,966 | 1.62 ( 0.73 - 3.62 ) | 0,490 |
| Carn.a.C4.0                               | 3.48 ( 1.41 - 8.57 ) | 0,047* | 2.32 ( 0.96 - 5.6 )  | 0,255 | 1.87 ( 0.86 - 4.08 ) | 0,330 |
| Carn.a.C5.0                               | 2.77 ( 1.11 - 6.89 ) | 0,126  | 2.4 ( 0.98 - 5.83 )  | 0,231 | 2.71 ( 1.24 - 5.95 ) | 0,105 |
| Carn.a.C6.0                               | 0.83 ( 0.33 - 2.1 )  | 0,836  | 1.06 ( 0.43 - 2.61 ) | 0,968 | 1.06 ( 0.48 - 2.36 ) | 0,960 |
| Carn.a.C6.0.OH                            | 0.57 ( 0.23 - 1.45 ) | 0,436  | 1.21 ( 0.49 - 3.01 ) | 0,842 | 1.74 ( 0.78 - 3.89 ) | 0,406 |
| Carn.a.C8.0                               | 0.5 ( 0.2 - 1.27 )   | 0,341  | 0.74 ( 0.3 - 1.82 )  | 0,717 | 0.86 ( 0.39 - 1.9 )  | 0,884 |
| Carn.a.C8.1                               | 0.82 ( 0.32 - 2.11 ) | 0,829  | 1.01 ( 0.4 - 2.54 )  | 0,986 | 0.68 ( 0.3 - 1.54 )  | 0,616 |
| Carn.a.C9.0                               | 1.59 ( 0.63 - 3.98 ) | 0,523  | 1.27 ( 0.52 - 3.12 ) | 0,784 | 1.66 ( 0.75 - 3.65 ) | 0,458 |
| Asn/Asp                                   | 0.97 ( 0.4 - 2.37 )  | 0,990  | 0.45 ( 0.19 - 1.08 ) | 0,279 | 0.79 ( 0.36 - 1.71 ) | 0,815 |
| Gln/Glu                                   | 1.05 ( 0.42 - 2.63 ) | 0,974  | 0.37 ( 0.15 - 0.9 )  | 0,182 | 0.37 ( 0.17 - 0.82 ) | 0,108 |
| NEFA18.1/NEFA18.0                         | 0.8 ( 0.31 - 2.03 )  | 0,797  | 0.63 ( 0.25 - 1.56 ) | 0,554 | 0.87 ( 0.39 - 1.95 ) | 0,885 |
| NEFA16.1/NEFA16.0                         | 0.46 ( 0.18 - 1.2 )  | 0,291  | 0.67 ( 0.27 - 1.7 )  | 0,622 | 1.26 ( 0.55 - 2.88 ) | 0,828 |
| PC.aa/PC.ae                               | 3.84 ( 1.53 - 9.67 ) | 0,038* | 2.3 ( 0.94 - 5.62 )  | 0,269 | 2.41 ( 1.09 - 5.32 ) | 0,143 |
| Lyso.PC.a/PC.aa                           | 1.43 ( 0.56 - 3.68 ) | 0,656  | 1.91 ( 0.78 - 4.66 ) | 0,402 | 1.03 ( 0.46 - 2.29 ) | 0,977 |
| (lyso.PC.a.C16.0 + lyso.PC.a.C18.0)/PC.aa | 0.91 ( 0.35 - 2.35 ) | 0,912  | 2.02 ( 0.82 - 4.97 ) | 0,365 | 1.06 ( 0.47 - 2.37 ) | 0,960 |
| (lyso.PC.a.C18.1 + lyso.PC.a.C18.2)       | 2.26 ( 0.89 - 5.71 ) | 0,255  | 1.13 ( 0.47 - 2.75 ) | 0,910 | 0.73 ( 0.33 - 1.61 ) | 0,700 |
| Carn.a.C.16.0/free Carn                   | 0.65 ( 0.26 - 1.63 ) | 0,545  | 0.6 ( 0.25 - 1.44 )  | 0,473 | 0.5 ( 0.23 - 1.11 )  | 0,302 |
| Carn.a.C2.0/Carn.a.C16.0                  | 1.96 ( 0.79 - 4.85 ) | 0,341  | 1.92 ( 0.79 - 4.64 ) | 0,393 | 1.75 ( 0.8 - 3.83 )  | 0,388 |

Values represent absolute differences in blood pressure (95% confidence interval) and corresponding p-values from linear regression models that reflect the difference in blood pressure (mmHg) per SDS increase in maternal early-pregnancy metabolite concentrations ( $\mu\text{mol/L}$ ) or metabolite ratio. Model includes gestational age at time of measurement, age, parity, pre-pregnancy body mass index, educational level, smoking, folic acid supplementation and family history of hypertension. AA amino acids, NEFA non-esterified fatty acids, PC.aa diacyl-phosphatidylcholines, PC.ae acyl-alkyl-phosphatidylcholines, lyso.PC.a acyl-lysophosphatidylcholines, lyso.PC.e alkyl-lysophosphatidylcholines, Carn.a acyl-carnitines, SM sphingomyelins

<sup>a</sup> p-value corrected for multiple hypothesis testing using Benjamin-Hochberg FDR correction.

\*Statistically significant

**Table S7.** Associations of early-pregnancy individual metabolites with diastolic blood pressure in early-, mid- and late pregnancy. Full model, additional adjustment for family history of hypertensive disorders.

|                   | <b>Differences in diastolic blood pressure in mmHg (95% confidence interval)</b> |                                 |                                  |                                 |                                   |                                 |
|-------------------|----------------------------------------------------------------------------------|---------------------------------|----------------------------------|---------------------------------|-----------------------------------|---------------------------------|
| <b>Metabolite</b> | <b>Early pregnancy<br/>N = 803</b>                                               | <b>P-<br/>value<sup>a</sup></b> | <b>Mid pregnancy<br/>N = 793</b> | <b>P-<br/>value<sup>a</sup></b> | <b>Late pregnancy<br/>N = 800</b> | <b>P-<br/>value<sup>a</sup></b> |
| Ala               | 1.07 ( 0.54 - 2.12 )                                                             | 0,898                           | 1.52 ( 0.78 - 2.95 )             | 0,430                           | 2.33 ( 1.25 - 4.34 )              | 0,055                           |
| Arg               | 1.89 ( 0.96 - 3.75 )                                                             | 0,162                           | 1.1 ( 0.57 - 2.15 )              | 0,861                           | 1.72 ( 0.92 - 3.21 )              | 0,158                           |
| Asn               | 0.9 ( 0.45 - 1.79 )                                                              | 0,835                           | 0.81 ( 0.42 - 1.58 )             | 0,727                           | 1.72 ( 0.92 - 3.22 )              | 0,161                           |
| Asp               | 2.62 ( 1.31 - 5.23 )                                                             | 0,045*                          | 1.73 ( 0.89 - 3.35 )             | 0,305                           | 3.03 ( 1.62 - 5.66 )              | 0,014*                          |
| Cit               | 0.99 ( 0.48 - 2.05 )                                                             | 0,983                           | 0.73 ( 0.37 - 1.47 )             | 0,607                           | 1.14 ( 0.59 - 2.21 )              | 0,713                           |
| Gln               | 1.27 ( 0.64 - 2.51 )                                                             | 0,603                           | 0.66 ( 0.34 - 1.27 )             | 0,430                           | 0.75 ( 0.4 - 1.42 )               | 0,438                           |
| Glu               | 2.62 ( 1.32 - 5.2 )                                                              | 0,045*                          | 1.99 ( 1.03 - 3.85 )             | 0,203                           | 3.63 ( 1.95 - 6.76 )              | 0,008                           |
| Gly               | 0.74 ( 0.38 - 1.46 )                                                             | 0,498                           | 0.87 ( 0.46 - 1.67 )             | 0,804                           | 1.53 ( 0.82 - 2.84 )              | 0,253                           |
| His               | 0.98 ( 0.49 - 1.99 )                                                             | 0,975                           | 0.82 ( 0.42 - 1.63 )             | 0,757                           | 1.96 ( 1.03 - 3.73 )              | 0,104                           |
| Ile               | 0.67 ( 0.34 - 1.35 )                                                             | 0,390                           | 0.83 ( 0.42 - 1.62 )             | 0,757                           | 1.47 ( 0.78 - 2.78 )              | 0,307                           |
| Leu               | 0.77 ( 0.39 - 1.52 )                                                             | 0,553                           | 0.82 ( 0.42 - 1.58 )             | 0,739                           | 1.66 ( 0.89 - 3.1 )               | 0,182                           |
| Lys               | 0.45 ( 0.23 - 0.89 )                                                             | 0,091                           | 1.16 ( 0.59 - 2.25 )             | 0,804                           | 2.14 ( 1.15 - 4 )                 | 0,064                           |
| Met               | 0.95 ( 0.48 - 1.89 )                                                             | 0,924                           | 0.86 ( 0.44 - 1.68 )             | 0,803                           | 1.24 ( 0.66 - 2.32 )              | 0,547                           |
| Orn               | 0.64 ( 0.32 - 1.29 )                                                             | 0,327                           | 0.95 ( 0.49 - 1.86 )             | 0,930                           | 1.99 ( 1.06 - 3.75 )              | 0,095                           |
| Phe               | 1.64 ( 0.84 - 3.22 )                                                             | 0,259                           | 1.23 ( 0.64 - 2.36 )             | 0,725                           | 1.98 ( 1.07 - 3.66 )              | 0,090                           |
| Pro               | 0.93 ( 0.47 - 1.83 )                                                             | 0,879                           | 0.78 ( 0.41 - 1.5 )              | 0,675                           | 1.37 ( 0.74 - 2.55 )              | 0,380                           |
| Trp               | 1.06 ( 0.53 - 2.11 )                                                             | 0,912                           | 1 ( 0.52 - 1.94 )                | 0,998                           | 1.39 ( 0.75 - 2.59 )              | 0,359                           |
| Ser               | 1.47 ( 0.74 - 2.92 )                                                             | 0,390                           | 0.91 ( 0.47 - 1.76 )             | 0,864                           | 1.95 ( 1.04 - 3.63 )              | 0,101                           |
| Thr               | 0.81 ( 0.4 - 1.64 )                                                              | 0,656                           | 1.03 ( 0.52 - 2.04 )             | 0,956                           | 1.64 ( 0.87 - 3.1 )               | 0,200                           |
| Tyr               | 1.25 ( 0.63 - 2.47 )                                                             | 0,622                           | 0.92 ( 0.48 - 1.77 )             | 0,873                           | 1.56 ( 0.84 - 2.89 )              | 0,239                           |
| Val               | 1.2 ( 0.6 - 2.37 )                                                               | 0,707                           | 0.91 ( 0.47 - 1.76 )             | 0,864                           | 1.65 ( 0.88 - 3.07 )              | 0,190                           |
| Cys               | 0.37 ( 0.18 - 0.74 )                                                             | 0,041*                          | 0.71 ( 0.36 - 1.4 )              | 0,535                           | 1 ( 0.53 - 1.91 )                 | 0,995                           |
| NEFA_14_0         | 2.21 ( 1.12 - 4.36 )                                                             | 0,091                           | 1.4 ( 0.73 - 2.69 )              | 0,529                           | 1.13 ( 0.61 - 2.1 )               | 0,717                           |
| NEFA_14_1         | 3.29 ( 1.66 - 6.51 )                                                             | 0,015*                          | 2.03 ( 1.05 - 3.92 )             | 0,203                           | 1.42 ( 0.75 - 2.67 )              | 0,340                           |
| NEFA_15_0         | 2.21 ( 1.12 - 4.34 )                                                             | 0,091                           | 1.5 ( 0.79 - 2.88 )              | 0,430                           | 0.88 ( 0.47 - 1.63 )              | 0,705                           |
| NEFA_16_0         | 2.8 ( 1.41 - 5.55 )                                                              | 0,036*                          | 1.73 ( 0.89 - 3.35 )             | 0,305                           | 1.49 ( 0.79 - 2.79 )              | 0,288                           |
| NEFA_16_1         | 3.42 ( 1.73 - 6.79 )                                                             | 0,013*                          | 2.26 ( 1.17 - 4.39 )             | 0,127                           | 2.26 ( 1.21 - 4.24 )              | 0,059                           |
| NEFA_16_2         | 2.67 ( 1.34 - 5.32 )                                                             | 0,041*                          | 1.61 ( 0.83 - 3.13 )             | 0,410                           | 1.66 ( 0.88 - 3.12 )              | 0,187                           |
| NEFA_17_0         | 2.25 ( 1.15 - 4.4 )                                                              | 0,083                           | 1.66 ( 0.87 - 3.18 )             | 0,332                           | 1.18 ( 0.64 - 2.19 )              | 0,635                           |
| NEFA_17_1         | 2.71 ( 1.38 - 5.33 )                                                             | 0,036*                          | 1.95 ( 1.02 - 3.74 )             | 0,203                           | 1.29 ( 0.69 - 2.4 )               | 0,478                           |
| NEFA_17_2         | 1.82 ( 0.92 - 3.59 )                                                             | 0,179                           | 1.09 ( 0.56 - 2.1 )              | 0,873                           | 1.37 ( 0.74 - 2.57 )              | 0,380                           |
| NEFA_18_0         | 2.48 ( 1.24 - 4.94 )                                                             | 0,053                           | 1.26 ( 0.65 - 2.46 )             | 0,701                           | 0.96 ( 0.51 - 1.82 )              | 0,919                           |
| NEFA_18_1         | 2.95 ( 1.5 - 5.83 )                                                              | 0,030*                          | 1.57 ( 0.82 - 3.04 )             | 0,418                           | 1.9 ( 1.02 - 3.56 )               | 0,109                           |
| NEFA_18_2         | 2.4 ( 1.22 - 4.71 )                                                              | 0,059                           | 1.17 ( 0.61 - 2.25 )             | 0,793                           | 1.35 ( 0.73 - 2.51 )              | 0,401                           |
| NEFA_18_3         | 1.75 ( 0.89 - 3.45 )                                                             | 0,204                           | 1.11 ( 0.58 - 2.13 )             | 0,856                           | 1.29 ( 0.7 - 2.4 )                | 0,474                           |
| NEFA_19_1         | 2.28 ( 1.16 - 4.46 )                                                             | 0,078                           | 1.46 ( 0.77 - 2.8 )              | 0,470                           | 1.23 ( 0.66 - 2.29 )              | 0,547                           |
| NEFA_20_1         | 2.93 ( 1.48 - 5.78 )                                                             | 0,030*                          | 1.37 ( 0.71 - 2.66 )             | 0,562                           | 2.19 ( 1.17 - 4.09 )              | 0,062                           |
| NEFA_20_2         | 2.7 ( 1.37 - 5.33 )                                                              | 0,038*                          | 2 ( 1.04 - 3.84 )                | 0,203                           | 2.28 ( 1.22 - 4.26 )              | 0,056                           |
| NEFA_20_3         | 3.48 ( 1.73 - 7.03 )                                                             | 0,013*                          | 2.84 ( 1.44 - 5.57 )             | 0,047*                          | 1.95 ( 1.02 - 3.71 )              | 0,109                           |
| NEFA_20_4         | 3.74 ( 1.9 - 7.36 )                                                              | 0,007*                          | 1.98 ( 1.03 - 3.81 )             | 0,203                           | 2.61 ( 1.41 - 4.85 )              | 0,032*                          |

|                 |                      |        |                      |        |                      |        |
|-----------------|----------------------|--------|----------------------|--------|----------------------|--------|
| NEFA_20_5       | 2.11 ( 1.06 - 4.21 ) | 0,101  | 1.2 ( 0.62 - 2.33 )  | 0,757  | 2.13 ( 1.14 - 3.97 ) | 0,065  |
| NEFA_22_3       | 3.1 ( 1.57 - 6.13 )  | 0,025* | 3.03 ( 1.57 - 5.85 ) | 0,045* | 2.45 ( 1.3 - 4.6 )   | 0,053  |
| NEFA_22_4       | 4.61 ( 2.31 - 9.24 ) | 0,004* | 2.87 ( 1.46 - 5.62 ) | 0,046* | 2.81 ( 1.48 - 5.34 ) | 0,028* |
| NEFA_22_5       | 4.06 ( 2.06 - 8.03 ) | 0,006* | 2.21 ( 1.14 - 4.27 ) | 0,137  | 2.31 ( 1.23 - 4.33 ) | 0,055  |
| NEFA_22_6       | 3.53 ( 1.78 - 6.99 ) | 0,013* | 1.75 ( 0.9 - 3.4 )   | 0,294  | 1.98 ( 1.05 - 3.72 ) | 0,096  |
| NEFA_24_0       | 1.19 ( 0.6 - 2.33 )  | 0,710  | 0.86 ( 0.45 - 1.66 ) | 0,803  | 0.9 ( 0.49 - 1.66 )  | 0,746  |
| NEFA_24_1       | 1.44 ( 0.73 - 2.84 ) | 0,416  | 0.76 ( 0.39 - 1.46 ) | 0,643  | 1.63 ( 0.87 - 3.03 ) | 0,200  |
| NEFA_24_2       | 2.45 ( 1.23 - 4.89 ) | 0,059  | 1.44 ( 0.74 - 2.79 ) | 0,492  | 1.62 ( 0.86 - 3.06 ) | 0,210  |
| NEFA_24_4       | 2.8 ( 1.42 - 5.53 )  | 0,036* | 2.59 ( 1.35 - 4.98 ) | 0,060  | 2.21 ( 1.19 - 4.12 ) | 0,062  |
| NEFA_24_5       | 3.92 ( 1.97 - 7.77 ) | 0,007* | 3.04 ( 1.58 - 5.88 ) | 0,045  | 3.25 ( 1.74 - 6.07 ) | 0,011* |
| NEFA_26_0       | 2.46 ( 1.26 - 4.84 ) | 0,052  | 1.18 ( 0.62 - 2.28 ) | 0,773  | 1.42 ( 0.76 - 2.64 ) | 0,333  |
| NEFA_26_1       | 2.75 ( 1.39 - 5.44 ) | 0,036* | 1.8 ( 0.93 - 3.5 )   | 0,274  | 1.69 ( 0.9 - 3.17 )  | 0,171  |
| NEFA_26_2       | 2.22 ( 1.09 - 4.49 ) | 0,095  | 1.57 ( 0.8 - 3.11 )  | 0,430  | 1.3 ( 0.68 - 2.49 )  | 0,478  |
| lyso.PC.a.C14.0 | 2.28 ( 1.13 - 4.59 ) | 0,091  | 3.37 ( 1.71 - 6.61 ) | 0,045* | 2.99 ( 1.57 - 5.66 ) | 0,019* |
| lyso.PC.a.C16.0 | 1.47 ( 0.73 - 2.99 ) | 0,404  | 2.7 ( 1.37 - 5.3 )   | 0,060  | 3.24 ( 1.71 - 6.14 ) | 0,011* |
| lyso.PC.a.C16.1 | 1.96 ( 0.95 - 4.03 ) | 0,165  | 2.87 ( 1.44 - 5.73 ) | 0,048* | 3.77 ( 1.96 - 7.25 ) | 0,008* |
| lyso.PC.a.C18.0 | 1.27 ( 0.62 - 2.58 ) | 0,618  | 1.83 ( 0.93 - 3.6 )  | 0,268  | 2.16 ( 1.14 - 4.08 ) | 0,065  |
| lyso.PC.a.C18.1 | 1.77 ( 0.89 - 3.52 ) | 0,204  | 1.76 ( 0.91 - 3.43 ) | 0,293  | 2.58 ( 1.38 - 4.83 ) | 0,036* |
| lyso.PC.a.C18.2 | 1.17 ( 0.59 - 2.35 ) | 0,738  | 0.87 ( 0.45 - 1.69 ) | 0,807  | 1.15 ( 0.61 - 2.15 ) | 0,699  |
| lyso.PC.a.C18.3 | 1.11 ( 0.57 - 2.16 ) | 0,835  | 1.06 ( 0.55 - 2.01 ) | 0,918  | 1.84 ( 1 - 3.39 )    | 0,112  |
| lyso.PC.a.C20.3 | 2.35 ( 1.19 - 4.67 ) | 0,072  | 2.82 ( 1.46 - 5.45 ) | 0,046* | 2.28 ( 1.22 - 4.26 ) | 0,056  |
| lyso.PC.a.C20.4 | 3.01 ( 1.51 - 6 )    | 0,030* | 2.58 ( 1.34 - 4.99 ) | 0,062  | 2.58 ( 1.38 - 4.83 ) | 0,036* |
| lyso.PC.a.C20.5 | 1.22 ( 0.61 - 2.45 ) | 0,660  | 1.37 ( 0.71 - 2.63 ) | 0,560  | 1.96 ( 1.05 - 3.64 ) | 0,095  |
| lyso.PC.a.C22.6 | 1.6 ( 0.8 - 3.19 )   | 0,304  | 1.44 ( 0.74 - 2.78 ) | 0,492  | 1.43 ( 0.76 - 2.67 ) | 0,331  |
| lyso.PC.e.C16.0 | 1.11 ( 0.55 - 2.23 ) | 0,836  | 1.82 ( 0.93 - 3.54 ) | 0,268  | 1.73 ( 0.92 - 3.28 ) | 0,159  |
| lyso.PC.e.C18.0 | 0.99 ( 0.5 - 1.96 )  | 0,975  | 2.03 ( 1.05 - 3.91 ) | 0,203  | 1.58 ( 0.84 - 2.96 ) | 0,231  |
| lyso.PC.e.C18.1 | 1.81 ( 0.89 - 3.69 ) | 0,204  | 2.01 ( 1.02 - 3.97 ) | 0,203  | 2.25 ( 1.18 - 4.3 )  | 0,062  |
| PC.aa.C30.0     | 2.09 ( 1.05 - 4.15 ) | 0,102  | 1.79 ( 0.92 - 3.46 ) | 0,277  | 1.52 ( 0.81 - 2.84 ) | 0,273  |
| PC.aa.C30.3     | 1.75 ( 0.88 - 3.48 ) | 0,214  | 1.41 ( 0.73 - 2.71 ) | 0,529  | 1.31 ( 0.7 - 2.48 )  | 0,456  |
| PC.aa.C32.0     | 2.93 ( 1.46 - 5.88 ) | 0,034* | 2.25 ( 1.16 - 4.37 ) | 0,128  | 2.48 ( 1.31 - 4.68 ) | 0,053  |
| PC.aa.C32.1     | 2.65 ( 1.32 - 5.34 ) | 0,045* | 2.89 ( 1.48 - 5.66 ) | 0,046  | 2.75 ( 1.45 - 5.21 ) | 0,030* |
| PC.aa.C32.2     | 1.84 ( 0.92 - 3.67 ) | 0,179  | 2.14 ( 1.1 - 4.14 )  | 0,166  | 1.62 ( 0.86 - 3.04 ) | 0,211  |
| PC.aa.C32.3     | 2.16 ( 1.06 - 4.41 ) | 0,102  | 2.12 ( 1.07 - 4.18 ) | 0,198  | 2.39 ( 1.25 - 4.57 ) | 0,055  |
| PC.aa.C34.1     | 2.33 ( 1.17 - 4.66 ) | 0,078  | 2.33 ( 1.21 - 4.49 ) | 0,106  | 2.68 ( 1.43 - 5.03 ) | 0,031* |
| PC.aa.C34.2     | 1.55 ( 0.77 - 3.13 ) | 0,338  | 1.46 ( 0.75 - 2.84 ) | 0,483  | 1.76 ( 0.93 - 3.33 ) | 0,153  |
| PC.aa.C34.3     | 1.56 ( 0.78 - 3.14 ) | 0,327  | 1.88 ( 0.97 - 3.67 ) | 0,238  | 2.06 ( 1.1 - 3.89 )  | 0,078  |
| PC.aa.C34.4     | 2.46 ( 1.25 - 4.83 ) | 0,052  | 2.52 ( 1.32 - 4.82 ) | 0,065  | 1.75 ( 0.94 - 3.25 ) | 0,148  |
| PC.aa.C34.5     | 2.21 ( 1.09 - 4.49 ) | 0,095  | 1.55 ( 0.78 - 3.08 ) | 0,430  | 1.75 ( 0.92 - 3.35 ) | 0,159  |
| PC.aa.C36.0     | 1.82 ( 0.9 - 3.7 )   | 0,198  | 1.7 ( 0.86 - 3.36 )  | 0,336  | 1.75 ( 0.92 - 3.34 ) | 0,159  |
| PC.aa.C36.1     | 2.17 ( 1.1 - 4.31 )  | 0,094  | 1.52 ( 0.78 - 2.94 ) | 0,430  | 2.36 ( 1.26 - 4.42 ) | 0,055  |
| PC.aa.C36.2     | 1.53 ( 0.76 - 3.09 ) | 0,352  | 1.28 ( 0.65 - 2.51 ) | 0,688  | 1.56 ( 0.82 - 2.96 ) | 0,253  |
| PC.aa.C36.3     | 1.74 ( 0.86 - 3.53 ) | 0,226  | 1.88 ( 0.96 - 3.68 ) | 0,238  | 1.85 ( 0.98 - 3.5 )  | 0,122  |
| PC.aa.C36.4     | 2.51 ( 1.26 - 5 )    | 0,052  | 2.8 ( 1.45 - 5.41 )  | 0,046* | 2.23 ( 1.19 - 4.2 )  | 0,062  |
| PC.aa.C36.5     | 1.78 ( 0.89 - 3.54 ) | 0,204  | 1.78 ( 0.92 - 3.47 ) | 0,277  | 2.53 ( 1.35 - 4.74 ) | 0,043* |
| PC.aa.C36.6     | 1.45 ( 0.72 - 2.92 ) | 0,418  | 1.83 ( 0.93 - 3.58 ) | 0,268  | 1.96 ( 1.04 - 3.71 ) | 0,102  |

|              |                      |        |                      |        |                      |        |
|--------------|----------------------|--------|----------------------|--------|----------------------|--------|
| PC.aa.C38.0  | 1.36 ( 0.66 - 2.77 ) | 0,509  | 1.16 ( 0.58 - 2.32 ) | 0,804  | 1.92 ( 1 - 3.67 )    | 0,112  |
| PC.aa.C38.2  | 1.43 ( 0.71 - 2.9 )  | 0,444  | 1.95 ( 0.99 - 3.83 ) | 0,225  | 1.91 ( 1 - 3.62 )    | 0,112  |
| PC.aa.C38.3  | 2.17 ( 1.07 - 4.41 ) | 0,101  | 2.5 ( 1.27 - 4.94 )  | 0,086  | 2.16 ( 1.13 - 4.12 ) | 0,066  |
| PC.aa.C38.4  | 2.79 ( 1.4 - 5.56 )  | 0,036* | 2.56 ( 1.32 - 4.96 ) | 0,065  | 2.33 ( 1.24 - 4.4 )  | 0,055  |
| PC.aa.C38.5  | 2.2 ( 1.11 - 4.35 )  | 0,092  | 2.33 ( 1.21 - 4.48 ) | 0,105  | 2.73 ( 1.46 - 5.1 )  | 0,028* |
| PC.aa.C38.6  | 1.65 ( 0.8 - 3.38 )  | 0,291  | 1.7 ( 0.85 - 3.39 )  | 0,343  | 2.01 ( 1.04 - 3.88 ) | 0,102  |
| PC.aa.C40.0  | 1.88 ( 0.92 - 3.85 ) | 0,179  | 1.05 ( 0.53 - 2.1 )  | 0,930  | 1.57 ( 0.82 - 3.02 ) | 0,253  |
| PC.aa.C40.1  | 2.57 ( 1.28 - 5.16 ) | 0,051  | 1.45 ( 0.74 - 2.85 ) | 0,492  | 1.35 ( 0.72 - 2.56 ) | 0,406  |
| PC.aa.C40.2  | 2.59 ( 1.3 - 5.15 )  | 0,045* | 1.52 ( 0.78 - 2.96 ) | 0,430  | 1.86 ( 0.99 - 3.49 ) | 0,114  |
| PC.aa.C40.3  | 2.84 ( 1.43 - 5.66 ) | 0,036* | 2.2 ( 1.13 - 4.28 )  | 0,148  | 1.9 ( 1.01 - 3.57 )  | 0,112  |
| PC.aa.C40.4  | 3.4 ( 1.71 - 6.76 )  | 0,013* | 3.16 ( 1.63 - 6.11 ) | 0,045* | 2.4 ( 1.28 - 4.49 )  | 0,055  |
| PC.aa.C40.5  | 2.15 ( 1.09 - 4.22 ) | 0,094  | 2.41 ( 1.26 - 4.61 ) | 0,084  | 2.19 ( 1.18 - 4.06 ) | 0,062  |
| PC.aa.C40.6  | 2.14 ( 1.06 - 4.32 ) | 0,102  | 1.76 ( 0.9 - 3.47 )  | 0,300  | 2.17 ( 1.14 - 4.13 ) | 0,065  |
| PC.aa.C42.0  | 1.66 ( 0.84 - 3.31 ) | 0,258  | 1.28 ( 0.66 - 2.5 )  | 0,681  | 1.91 ( 1.02 - 3.56 ) | 0,109  |
| PC.aa.C42.5  | 1.88 ( 0.95 - 3.74 ) | 0,165  | 1.47 ( 0.76 - 2.84 ) | 0,470  | 1.86 ( 1 - 3.46 )    | 0,113  |
| PC.aa.C43.6  | 1.43 ( 0.71 - 2.87 ) | 0,440  | 1.59 ( 0.81 - 3.11 ) | 0,418  | 1.88 ( 1 - 3.55 )    | 0,112  |
| PC.aa.C44.12 | 1.76 ( 0.88 - 3.54 ) | 0,214  | 1.55 ( 0.79 - 3.04 ) | 0,430  | 2.25 ( 1.19 - 4.27 ) | 0,062  |
| PC.ae.C30.0  | 1.92 ( 0.97 - 3.83 ) | 0,154  | 1.71 ( 0.88 - 3.32 ) | 0,314  | 1.35 ( 0.72 - 2.53 ) | 0,406  |
| PC.ae.C32.0  | 1.86 ( 0.93 - 3.72 ) | 0,174  | 1.69 ( 0.87 - 3.28 ) | 0,323  | 1.71 ( 0.91 - 3.21 ) | 0,166  |
| PC.ae.C32.1  | 2 ( 0.99 - 4.04 )    | 0,140  | 1.8 ( 0.92 - 3.55 )  | 0,277  | 1.81 ( 0.95 - 3.47 ) | 0,141  |
| PC.ae.C32.2  | 1.63 ( 0.82 - 3.26 ) | 0,282  | 1.19 ( 0.61 - 2.31 ) | 0,773  | 1.44 ( 0.76 - 2.73 ) | 0,327  |
| PC.ae.C34.0  | 1.98 ( 0.99 - 3.94 ) | 0,139  | 1.72 ( 0.89 - 3.33 ) | 0,308  | 1.27 ( 0.67 - 2.38 ) | 0,511  |
| PC.ae.C34.1  | 1.67 ( 0.83 - 3.34 ) | 0,259  | 1.52 ( 0.78 - 2.95 ) | 0,430  | 1.77 ( 0.94 - 3.34 ) | 0,148  |
| PC.ae.C34.2  | 1.39 ( 0.68 - 2.84 ) | 0,479  | 1.15 ( 0.58 - 2.28 ) | 0,814  | 1.61 ( 0.84 - 3.11 ) | 0,231  |
| PC.ae.C34.3  | 1.41 ( 0.71 - 2.79 ) | 0,450  | 1.11 ( 0.57 - 2.15 ) | 0,852  | 1.42 ( 0.75 - 2.67 ) | 0,340  |
| PC.ae.C34.4  | 1.48 ( 0.74 - 2.99 ) | 0,390  | 1.2 ( 0.61 - 2.36 )  | 0,757  | 1.7 ( 0.89 - 3.23 )  | 0,180  |
| PC.ae.C36.0  | 1.94 ( 0.97 - 3.89 ) | 0,154  | 1.97 ( 1.02 - 3.83 ) | 0,203  | 2.14 ( 1.13 - 4.03 ) | 0,066  |
| PC.ae.C36.1  | 2.23 ( 1.12 - 4.44 ) | 0,091  | 1.97 ( 1.02 - 3.84 ) | 0,203  | 2.42 ( 1.29 - 4.54 ) | 0,053  |
| PC.ae.C36.2  | 1.12 ( 0.55 - 2.28 ) | 0,835  | 1.02 ( 0.51 - 2.03 ) | 0,971  | 1.15 ( 0.6 - 2.21 )  | 0,699  |
| PC.ae.C36.3  | 1.63 ( 0.81 - 3.28 ) | 0,284  | 1.52 ( 0.78 - 2.98 ) | 0,430  | 2.19 ( 1.16 - 4.15 ) | 0,064  |
| PC.ae.C36.4  | 2.74 ( 1.39 - 5.4 )  | 0,036* | 2.59 ( 1.35 - 4.97 ) | 0,060  | 2.34 ( 1.26 - 4.35 ) | 0,055  |
| PC.ae.C36.5  | 2.45 ( 1.24 - 4.81 ) | 0,053  | 2.02 ( 1.05 - 3.87 ) | 0,203  | 2.12 ( 1.14 - 3.93 ) | 0,064  |
| PC.ae.C38.0  | 1.25 ( 0.61 - 2.56 ) | 0,638  | 1.48 ( 0.75 - 2.95 ) | 0,470  | 1.8 ( 0.94 - 3.45 )  | 0,148  |
| PC.ae.C38.2  | 1.37 ( 0.67 - 2.81 ) | 0,498  | 1.29 ( 0.65 - 2.56 ) | 0,681  | 1.23 ( 0.64 - 2.36 ) | 0,583  |
| PC.ae.C38.3  | 2.02 ( 1 - 4.1 )     | 0,136  | 2.46 ( 1.25 - 4.84 ) | 0,088  | 2.09 ( 1.1 - 3.97 )  | 0,078  |
| PC.ae.C38.4  | 2.02 ( 1.02 - 3.98 ) | 0,120  | 1.9 ( 0.99 - 3.65 )  | 0,225  | 1.88 ( 1.01 - 3.51 ) | 0,112  |
| PC.ae.C38.5  | 2.13 ( 1.07 - 4.22 ) | 0,097  | 1.96 ( 1.02 - 3.78 ) | 0,203  | 2.32 ( 1.24 - 4.32 ) | 0,055  |
| PC.ae.C38.6  | 2.2 ( 1.09 - 4.41 )  | 0,095  | 1.71 ( 0.87 - 3.37 ) | 0,322  | 2.41 ( 1.28 - 4.55 ) | 0,055  |
| PC.ae.C40.0  | 1.95 ( 0.94 - 4.04 ) | 0,170  | 1.87 ( 0.93 - 3.77 ) | 0,268  | 1.55 ( 0.79 - 3.04 ) | 0,278  |
| PC.ae.C40.1  | 1.76 ( 0.85 - 3.63 ) | 0,226  | 1.32 ( 0.65 - 2.66 ) | 0,672  | 1.53 ( 0.79 - 2.97 ) | 0,279  |
| PC.ae.C40.2  | 1.59 ( 0.79 - 3.22 ) | 0,311  | 1.14 ( 0.58 - 2.26 ) | 0,821  | 1.88 ( 0.99 - 3.57 ) | 0,117  |
| PC.ae.C40.3  | 2.19 ( 1.08 - 4.44 ) | 0,097  | 1.53 ( 0.77 - 3.04 ) | 0,430  | 1.47 ( 0.77 - 2.81 ) | 0,320  |
| PC.ae.C40.4  | 1.92 ( 0.96 - 3.84 ) | 0,156  | 1.43 ( 0.73 - 2.79 ) | 0,503  | 1.67 ( 0.88 - 3.16 ) | 0,187  |
| PC.ae.C40.5  | 1.74 ( 0.87 - 3.49 ) | 0,217  | 1.32 ( 0.67 - 2.58 ) | 0,650  | 2.21 ( 1.17 - 4.19 ) | 0,062  |
| PC.ae.C40.6  | 1.39 ( 0.68 - 2.81 ) | 0,479  | 1.24 ( 0.63 - 2.46 ) | 0,725  | 1.95 ( 1.02 - 3.72 ) | 0,109  |

|                  |                      |        |                      |        |                      |        |
|------------------|----------------------|--------|----------------------|--------|----------------------|--------|
| PC.ae.C42.1      | 2.69 ( 1.32 - 5.48 ) | 0,045* | 3.14 ( 1.58 - 6.22 ) | 0,045* | 1.52 ( 0.79 - 2.92 ) | 0,279  |
| PC.ae.C42.3      | 1.04 ( 0.51 - 2.15 ) | 0,932  | 0.67 ( 0.34 - 1.34 ) | 0,470  | 1.24 ( 0.64 - 2.42 ) | 0,561  |
| PC.ae.C42.4      | 1.57 ( 0.78 - 3.16 ) | 0,321  | 1.41 ( 0.72 - 2.76 ) | 0,529  | 1.82 ( 0.96 - 3.45 ) | 0,132  |
| PC.ae.C42.5      | 1.56 ( 0.78 - 3.14 ) | 0,327  | 1.18 ( 0.6 - 2.3 )   | 0,793  | 1.9 ( 1 - 3.61 )     | 0,112  |
| PC.ae.C42.6      | 1.18 ( 0.58 - 2.39 ) | 0,735  | 0.94 ( 0.48 - 1.87 ) | 0,918  | 1.56 ( 0.82 - 2.97 ) | 0,253  |
| SM.a.C30.1       | 1.85 ( 0.92 - 3.71 ) | 0,179  | 1.75 ( 0.9 - 3.41 )  | 0,294  | 1.55 ( 0.83 - 2.9 )  | 0,253  |
| SM.a.C32.1       | 1.76 ( 0.87 - 3.57 ) | 0,214  | 2.25 ( 1.16 - 4.38 ) | 0,128  | 1.63 ( 0.86 - 3.08 ) | 0,211  |
| SM.a.C32.2       | 2.22 ( 1.07 - 4.6 )  | 0,101  | 2.36 ( 1.19 - 4.67 ) | 0,120  | 2.5 ( 1.3 - 4.79 )   | 0,053  |
| SM.a.C33.1       | 1.41 ( 0.69 - 2.87 ) | 0,469  | 1.5 ( 0.76 - 2.95 )  | 0,455  | 1.38 ( 0.72 - 2.63 ) | 0,390  |
| SM.a.C34.1       | 2.02 ( 0.99 - 4.12 ) | 0,139  | 1.59 ( 0.81 - 3.13 ) | 0,421  | 1.58 ( 0.82 - 3.04 ) | 0,250  |
| SM.a.C34.2       | 2.75 ( 1.3 - 5.83 )  | 0,051  | 1.98 ( 0.98 - 4.03 ) | 0,236  | 2.08 ( 1.06 - 4.08 ) | 0,095  |
| SM.a.C35.0       | 1.66 ( 0.82 - 3.36 ) | 0,264  | 1.32 ( 0.67 - 2.6 )  | 0,650  | 1.84 ( 0.96 - 3.51 ) | 0,134  |
| SM.a.C35.1       | 1.17 ( 0.57 - 2.41 ) | 0,762  | 1.45 ( 0.73 - 2.89 ) | 0,492  | 1.46 ( 0.76 - 2.81 ) | 0,327  |
| SM.a.C36.1       | 1.95 ( 0.94 - 4.04 ) | 0,165  | 2 ( 1 - 3.98 )       | 0,212  | 2.53 ( 1.31 - 4.86 ) | 0,053  |
| SM.a.C36.2       | 1.83 ( 0.86 - 3.9 )  | 0,214  | 2 ( 0.98 - 4.08 )    | 0,229  | 2.33 ( 1.18 - 4.58 ) | 0,062  |
| SM.a.C36.3       | 1.73 ( 0.82 - 3.66 ) | 0,261  | 1.58 ( 0.78 - 3.2 )  | 0,430  | 2.07 ( 1.06 - 4.05 ) | 0,095  |
| SM.a.C37.1       | 1.3 ( 0.63 - 2.65 )  | 0,585  | 1.53 ( 0.78 - 3 )    | 0,430  | 2.37 ( 1.26 - 4.47 ) | 0,055  |
| SM.a.C38.2       | 1.34 ( 0.66 - 2.75 ) | 0,525  | 1.59 ( 0.81 - 3.11 ) | 0,418  | 2.17 ( 1.14 - 4.12 ) | 0,065  |
| SM.a.C38.3       | 1.34 ( 0.66 - 2.69 ) | 0,525  | 1.59 ( 0.82 - 3.09 ) | 0,418  | 1.85 ( 0.98 - 3.49 ) | 0,119  |
| SM.a.C39.1       | 1.95 ( 0.94 - 4.05 ) | 0,170  | 1.77 ( 0.88 - 3.54 ) | 0,305  | 1.94 ( 1 - 3.74 )    | 0,112  |
| SM.a.C39.2       | 1.11 ( 0.53 - 2.3 )  | 0,843  | 1.1 ( 0.55 - 2.19 )  | 0,865  | 1.67 ( 0.86 - 3.22 ) | 0,202  |
| SM.a.C40.2       | 2.01 ( 0.99 - 4.06 ) | 0,139  | 2.12 ( 1.08 - 4.14 ) | 0,189  | 2.29 ( 1.21 - 4.33 ) | 0,059  |
| SM.a.C40.5       | 2 ( 1.01 - 3.99 )    | 0,132  | 1.88 ( 0.97 - 3.64 ) | 0,238  | 3.34 ( 1.79 - 6.22 ) | 0,011* |
| SM.a.C41.1       | 2.02 ( 1.01 - 4.05 ) | 0,132  | 1.96 ( 1.01 - 3.77 ) | 0,203  | 2.24 ( 1.2 - 4.18 )  | 0,059  |
| SM.a.C41.2       | 1.55 ( 0.76 - 3.13 ) | 0,341  | 1.47 ( 0.75 - 2.87 ) | 0,470  | 2.1 ( 1.11 - 3.96 )  | 0,074  |
| SM.a.C42.1       | 2.09 ( 1.05 - 4.14 ) | 0,104  | 1.29 ( 0.67 - 2.5 )  | 0,674  | 1.76 ( 0.94 - 3.28 ) | 0,148  |
| SM.a.C42.2       | 2.23 ( 1.09 - 4.57 ) | 0,095  | 1.28 ( 0.65 - 2.54 ) | 0,688  | 2.22 ( 1.16 - 4.26 ) | 0,064  |
| SM.a.C42.3       | 2.11 ( 1.03 - 4.31 ) | 0,115  | 1.57 ( 0.79 - 3.1 )  | 0,430  | 2.16 ( 1.13 - 4.13 ) | 0,069  |
| SM.a.C42.4       | 2.69 ( 1.35 - 5.34 ) | 0,041  | 2.8 ( 1.45 - 5.4 )   | 0,046* | 2.76 ( 1.47 - 5.18 ) | 0,028* |
| SM.a.C42.6       | 1.99 ( 0.97 - 4.06 ) | 0,149  | 2.02 ( 1.02 - 4.01 ) | 0,203  | 2.26 ( 1.18 - 4.34 ) | 0,062  |
| SM.a.C43.1       | 2.31 ( 1.14 - 4.7 )  | 0,090  | 1.17 ( 0.59 - 2.32 ) | 0,794  | 1.55 ( 0.82 - 2.96 ) | 0,257  |
| SM.a.C43.2       | 2.22 ( 1.1 - 4.48 )  | 0,094  | 1.88 ( 0.96 - 3.68 ) | 0,240  | 1.51 ( 0.8 - 2.85 )  | 0,279  |
| SM.a.C44.6       | 1.87 ( 0.92 - 3.78 ) | 0,179  | 1.41 ( 0.72 - 2.78 ) | 0,529  | 2.35 ( 1.24 - 4.46 ) | 0,055  |
| SM.e.C36.2       | 1.63 ( 0.78 - 3.42 ) | 0,308  | 1.27 ( 0.63 - 2.55 ) | 0,715  | 1.55 ( 0.79 - 3.03 ) | 0,279  |
| SM.e.C38.3       | 1.23 ( 0.61 - 2.45 ) | 0,659  | 1.3 ( 0.67 - 2.52 )  | 0,672  | 2.07 ( 1.1 - 3.9 )   | 0,075  |
| SM.e.C40.5       | 1.7 ( 0.86 - 3.35 )  | 0,226  | 1.56 ( 0.81 - 2.99 ) | 0,426  | 2.13 ( 1.15 - 3.95 ) | 0,064  |
| Carn             | 1.47 ( 0.73 - 2.98 ) | 0,403  | 1.24 ( 0.64 - 2.42 ) | 0,725  | 2.19 ( 1.17 - 4.12 ) | 0,062  |
| Carn.a.C10.0     | 2.23 ( 1.13 - 4.43 ) | 0,091  | 1.24 ( 0.64 - 2.42 ) | 0,725  | 1.67 ( 0.89 - 3.13 ) | 0,182  |
| Carn.a.C10.1     | 1.59 ( 0.79 - 3.19 ) | 0,308  | 1.01 ( 0.52 - 1.98 ) | 0,990  | 1.86 ( 0.99 - 3.5 )  | 0,117  |
| Carn.a.C12.0     | 1.7 ( 0.86 - 3.37 )  | 0,226  | 1.17 ( 0.6 - 2.26 )  | 0,794  | 1.93 ( 1.03 - 3.61 ) | 0,106  |
| Carn.a.C14.1     | 1.38 ( 0.7 - 2.73 )  | 0,479  | 0.83 ( 0.43 - 1.61 ) | 0,757  | 1.88 ( 1.01 - 3.51 ) | 0,112  |
| Carn.a.C14.2     | 1.08 ( 0.55 - 2.13 ) | 0,877  | 0.91 ( 0.47 - 1.74 ) | 0,857  | 1.78 ( 0.96 - 3.32 ) | 0,134  |
| Carn.a.C15.0     | 1.14 ( 0.58 - 2.26 ) | 0,788  | 1 ( 0.52 - 1.93 )    | 0,998  | 1.44 ( 0.77 - 2.69 ) | 0,327  |
| Carn.a.C16.0     | 1.29 ( 0.66 - 2.55 ) | 0,565  | 1.46 ( 0.76 - 2.81 ) | 0,470  | 1.37 ( 0.74 - 2.56 ) | 0,380  |
| Carn.a.C16.0.Oxo | 1.12 ( 0.56 - 2.25 ) | 0,831  | 0.98 ( 0.5 - 1.92 )  | 0,971  | 1.51 ( 0.79 - 2.86 ) | 0,279  |

|                                           |                    |       |                    |       |                    |        |
|-------------------------------------------|--------------------|-------|--------------------|-------|--------------------|--------|
| Carn.a.C16.1                              | 1.01 (0.51 - 2.01) | 0,975 | 1 (0.52 - 1.93)    | 0,998 | 1.87 (1 - 3.5)     | 0,113  |
| Carn.a.C16.2                              | 0.74 (0.38 - 1.46) | 0,499 | 0.82 (0.43 - 1.58) | 0,742 | 1.56 (0.84 - 2.9)  | 0,234  |
| Carn.a.C18.0                              | 0.87 (0.44 - 1.72) | 0,776 | 0.65 (0.34 - 1.26) | 0,430 | 1.03 (0.55 - 1.92) | 0,928  |
| Carn.a.C18.1                              | 1.37 (0.69 - 2.72) | 0,487 | 1.06 (0.54 - 2.06) | 0,918 | 2.07 (1.1 - 3.88)  | 0,075  |
| Carn.a.C18.2                              | 1.25 (0.64 - 2.47) | 0,618 | 1.08 (0.56 - 2.07) | 0,882 | 1.7 (0.92 - 3.16)  | 0,161  |
| Carn.a.C18.2.OH                           | 1.05 (0.53 - 2.06) | 0,924 | 0.9 (0.47 - 1.72)  | 0,852 | 1.17 (0.63 - 2.17) | 0,660  |
| Carn.a.C2.0                               | 2.31 (1.16 - 4.58) | 0,078 | 1.55 (0.8 - 3)     | 0,430 | 3.11 (1.66 - 5.81) | 0,012* |
| Carn.a.C20.0                              | 1.52 (0.76 - 3.02) | 0,349 | 1.81 (0.94 - 3.48) | 0,266 | 1.29 (0.69 - 2.4)  | 0,480  |
| Carn.a.C20.1                              | 1.27 (0.65 - 2.48) | 0,600 | 0.97 (0.51 - 1.85) | 0,961 | 1.57 (0.85 - 2.91) | 0,231  |
| Carn.a.C20.3                              | 1.1 (0.57 - 2.16)  | 0,836 | 1.12 (0.59 - 2.12) | 0,845 | 1.2 (0.65 - 2.21)  | 0,603  |
| Carn.a.C20.4                              | 1.37 (0.7 - 2.69)  | 0,479 | 1.16 (0.61 - 2.23) | 0,794 | 1.43 (0.77 - 2.67) | 0,327  |
| Carn.a.C3.0                               | 1.76 (0.89 - 3.47) | 0,204 | 1.28 (0.67 - 2.46) | 0,674 | 1.75 (0.94 - 3.24) | 0,148  |
| Carn.a.C3.0.DC                            | 1.03 (0.52 - 2.05) | 0,950 | 0.89 (0.46 - 1.74) | 0,845 | 1.28 (0.68 - 2.42) | 0,488  |
| Carn.a.C4.0                               | 1.82 (0.93 - 3.57) | 0,179 | 1.35 (0.7 - 2.59)  | 0,588 | 1.72 (0.93 - 3.19) | 0,155  |
| Carn.a.C5.0                               | 1.85 (0.94 - 3.65) | 0,170 | 1.58 (0.82 - 3.05) | 0,418 | 1.77 (0.95 - 3.31) | 0,141  |
| Carn.a.C6.0                               | 2.21 (1.11 - 4.39) | 0,091 | 1.24 (0.63 - 2.41) | 0,725 | 1.51 (0.8 - 2.84)  | 0,279  |
| Carn.a.C6.0.OH                            | 1.38 (0.69 - 2.77) | 0,479 | 1.15 (0.59 - 2.25) | 0,804 | 1.74 (0.92 - 3.29) | 0,157  |
| Carn.a.C8.0                               | 1.78 (0.9 - 3.56)  | 0,204 | 1.2 (0.62 - 2.34)  | 0,757 | 1.31 (0.7 - 2.47)  | 0,456  |
| Carn.a.C8.1                               | 1.6 (0.79 - 3.24)  | 0,308 | 1.6 (0.81 - 3.15)  | 0,418 | 1.91 (1 - 3.62)    | 0,112  |
| Carn.a.C9.0                               | 2.15 (1.09 - 4.27) | 0,095 | 1.09 (0.56 - 2.11) | 0,870 | 1.4 (0.75 - 2.63)  | 0,353  |
| Asn/Asp                                   | 0.35 (0.18 - 0.68) | 0,030 | 0.54 (0.28 - 1.04) | 0,238 | 0.51 (0.27 - 0.94) | 0,093  |
| Gln/Glu                                   | 0.57 (0.29 - 1.14) | 0,214 | 0.49 (0.25 - 0.96) | 0,203 | 0.31 (0.16 - 0.58) | 0,011* |
| NEFA18.1/NEFA18.0                         | 0.97 (0.48 - 1.94) | 0,947 | 0.8 (0.41 - 1.58)  | 0,725 | 1.47 (0.77 - 2.81) | 0,313  |
| NEFA16.1/NEFA16.0                         | 1.11 (0.54 - 2.27) | 0,843 | 1.3 (0.65 - 2.6)   | 0,674 | 1.27 (0.66 - 2.46) | 0,517  |
| PC.aa/PC.ae                               | 1.32 (0.66 - 2.65) | 0,534 | 1.56 (0.8 - 3.05)  | 0,430 | 1.49 (0.79 - 2.82) | 0,294  |
| Lyso.PC.a/PC.aa                           | 0.67 (0.33 - 1.36) | 0,390 | 1.12 (0.58 - 2.19) | 0,845 | 1.21 (0.64 - 2.29) | 0,603  |
| (lyso.PC.a.C16.0 + lyso.PC.a.C18.0)/PC.aa | 0.62 (0.3 - 1.26)  | 0,306 | 1.39 (0.71 - 2.73) | 0,555 | 1.44 (0.75 - 2.76) | 0,333  |
| (lyso.PC.a.C18.1 + lyso.PC.a.C18.2)       | 0.71 (0.35 - 1.42) | 0,450 | 0.61 (0.31 - 1.17) | 0,348 | 0.72 (0.38 - 1.35) | 0,359  |
| Carn.a.C.16.0/free Carn                   | 1.06 (0.53 - 2.1)  | 0,912 | 1.31 (0.68 - 2.53) | 0,650 | 0.87 (0.46 - 1.63) | 0,683  |
| Carn.a.C2.0/Carn.a.C16.0                  | 1.47 (0.74 - 2.89) | 0,390 | 0.96 (0.5 - 1.86)  | 0,950 | 1.51 (0.81 - 2.82) | 0,278  |

Values represent absolute differences in blood pressure (95% confidence interval) and corresponding p-values from linear regression models that reflect the difference in blood pressure (mmHg) per SDS increase in maternal early-pregnancy metabolite concentrations ( $\mu\text{mol/L}$ ) or metabolite ratio. Model includes gestational age at time of measurement, age, parity, pre-pregnancy body mass index, educational level, smoking, folic acid supplementation and family history of hypertension. AA amino acids, NEFA non-esterified fatty acids, PC.aa diacyl-phosphatidylcholines, PC.ae acyl-alkyl-phosphatidylcholines, lyso.PC.a acyl-lysophosphatidylcholines, lyso.PC.e alkyl-lysophosphatidylcholines, Carn.a acyl-carnitines, SM sphingomyelins

<sup>a</sup> p-value corrected for multiple hypothesis testing using Benjamin-Hochberg FDR correction.

\*Statistically significant

**Table S8.** Associations of early-pregnancy individual metabolites with systolic blood pressure in early-, mid- and late pregnancy. Full model, sensitivity analysis excluding women without preexisting hypertension.

|                   | <b>Differences in systolic blood pressure in mmHg (95% confidence interval)</b> |                                 |                                  |                                 |                                   |                                 |
|-------------------|---------------------------------------------------------------------------------|---------------------------------|----------------------------------|---------------------------------|-----------------------------------|---------------------------------|
| <b>Metabolite</b> | <b>Early pregnancy<br/>N = 790</b>                                              | <b>P-<br/>value<sup>a</sup></b> | <b>Mid pregnancy<br/>N = 780</b> | <b>P-<br/>value<sup>a</sup></b> | <b>Late pregnancy<br/>N = 786</b> | <b>P-<br/>value<sup>a</sup></b> |
| Ala               | 3.12 ( 1.24 - 7.8 )                                                             | 0,081                           | 2.02 ( 0.82 - 4.97 )             | 0,372                           | 2.49 ( 1.13 - 5.5 )               | 0,135                           |
| Arg               | 5.08 ( 2.04 - 12.69 )                                                           | 0,007*                          | 2.52 ( 1.02 - 6.25 )             | 0,208                           | 3.28 ( 1.49 - 7.23 )              | 0,063                           |
| Asn               | 3.31 ( 1.32 - 8.3 )                                                             | 0,066                           | 1.11 ( 0.45 - 2.73 )             | 0,917                           | 3.08 ( 1.4 - 6.77 )               | 0,063                           |
| Asp               | 1.99 ( 0.79 - 5.04 )                                                            | 0,336                           | 2.76 ( 1.12 - 6.8 )              | 0,181                           | 3.09 ( 1.4 - 6.84 )               | 0,063                           |
| Cit               | 1.34 ( 0.5 - 3.54 )                                                             | 0,750                           | 0.86 ( 0.33 - 2.22 )             | 0,887                           | 1.15 ( 0.5 - 2.67 )               | 0,884                           |
| Gln               | 2.29 ( 0.92 - 5.68 )                                                            | 0,223                           | 1.04 ( 0.43 - 2.52 )             | 0,968                           | 0.97 ( 0.44 - 2.13 )              | 0,985                           |
| Glu               | 1.79 ( 0.71 - 4.52 )                                                            | 0,417                           | 3.47 ( 1.41 - 8.51 )             | 0,081                           | 3.12 ( 1.41 - 6.9 )               | 0,063                           |
| Gly               | 0.86 ( 0.35 - 2.14 )                                                            | 0,874                           | 1 ( 0.41 - 2.42 )                | 1,000                           | 1.35 ( 0.62 - 2.97 )              | 0,707                           |
| His               | 3.72 ( 1.46 - 9.5 )                                                             | 0,046*                          | 1.59 ( 0.64 - 3.96 )             | 0,560                           | 3.12 ( 1.41 - 6.93 )              | 0,063                           |
| Ile               | 3.22 ( 1.27 - 8.16 )                                                            | 0,077                           | 1.32 ( 0.53 - 3.27 )             | 0,755                           | 1.61 ( 0.72 - 3.57 )              | 0,498                           |
| Leu               | 2.88 ( 1.15 - 7.21 )                                                            | 0,110                           | 1.32 ( 0.54 - 3.23 )             | 0,751                           | 2.12 ( 0.97 - 4.65 )              | 0,222                           |
| Lys               | 0.81 ( 0.32 - 2.04 )                                                            | 0,810                           | 1.39 ( 0.56 - 3.44 )             | 0,700                           | 2.99 ( 1.36 - 6.6 )               | 0,068                           |
| Met               | 2.96 ( 1.19 - 7.41 )                                                            | 0,101                           | 1.49 ( 0.6 - 3.66 )              | 0,614                           | 1.82 ( 0.83 - 4.02 )              | 0,351                           |
| Orn               | 1.28 ( 0.5 - 3.25 )                                                             | 0,781                           | 1.29 ( 0.53 - 3.17 )             | 0,755                           | 2.08 ( 0.94 - 4.59 )              | 0,256                           |
| Phe               | 5.83 ( 2.38 - 14.27 )                                                           | 0,003*                          | 2.51 ( 1.04 - 6.07 )             | 0,208                           | 2.4 ( 1.11 - 5.22 )               | 0,135                           |
| Pro               | 2.39 ( 0.96 - 5.96 )                                                            | 0,193                           | 1.88 ( 0.77 - 4.58 )             | 0,390                           | 1.56 ( 0.71 - 3.42 )              | 0,498                           |
| Trp               | 7.77 ( 3.13 - 19.29 )                                                           | 0,001*                          | 2.93 ( 1.2 - 7.17 )              | 0,158                           | 3.06 ( 1.4 - 6.68 )               | 0,063                           |
| Ser               | 2.22 ( 0.89 - 5.52 )                                                            | 0,243                           | 1.2 ( 0.5 - 2.9 )                | 0,834                           | 2.58 ( 1.18 - 5.64 )              | 0,123                           |
| Thr               | 1.6 ( 0.62 - 4.12 )                                                             | 0,523                           | 1.57 ( 0.62 - 3.95 )             | 0,579                           | 2.18 ( 0.98 - 4.87 )              | 0,214                           |
| Tyr               | 5.55 ( 2.24 - 13.7 )                                                            | 0,004*                          | 2.12 ( 0.88 - 5.15 )             | 0,303                           | 2.75 ( 1.26 - 5.98 )              | 0,091                           |
| Val               | 5.6 ( 2.25 - 13.96 )                                                            | 0,004*                          | 1.95 ( 0.8 - 4.74 )              | 0,384                           | 2.72 ( 1.24 - 5.96 )              | 0,094                           |
| Cys               | 0.97 ( 0.38 - 2.51 )                                                            | 0,983                           | 1.12 ( 0.44 - 2.81 )             | 0,917                           | 1.47 ( 0.65 - 3.33 )              | 0,620                           |
| NEFA_14_0         | 1.59 ( 0.63 - 3.98 )                                                            | 0,520                           | 1.46 ( 0.6 - 3.56 )              | 0,628                           | 0.85 ( 0.39 - 1.87 )              | 0,873                           |
| NEFA_14_1         | 1.03 ( 0.41 - 2.61 )                                                            | 0,983                           | 1.28 ( 0.52 - 3.14 )             | 0,755                           | 0.99 ( 0.45 - 2.21 )              | 0,993                           |
| NEFA_15_0         | 1.68 ( 0.67 - 4.19 )                                                            | 0,463                           | 1.58 ( 0.65 - 3.82 )             | 0,555                           | 0.68 ( 0.31 - 1.49 )              | 0,596                           |
| NEFA_16_0         | 1.81 ( 0.72 - 4.57 )                                                            | 0,408                           | 1.79 ( 0.73 - 4.38 )             | 0,421                           | 0.87 ( 0.39 - 1.94 )              | 0,884                           |
| NEFA_16_1         | 0.93 ( 0.37 - 2.34 )                                                            | 0,928                           | 1.4 ( 0.57 - 3.43 )              | 0,693                           | 1.01 ( 0.45 - 2.25 )              | 0,993                           |
| NEFA_16_2         | 1.31 ( 0.52 - 3.33 )                                                            | 0,750                           | 1.45 ( 0.59 - 3.57 )             | 0,640                           | 0.88 ( 0.4 - 1.97 )               | 0,897                           |
| NEFA_17_0         | 1.48 ( 0.6 - 3.67 )                                                             | 0,589                           | 1.39 ( 0.58 - 3.35 )             | 0,693                           | 0.92 ( 0.42 - 2.01 )              | 0,945                           |
| NEFA_17_1         | 1.57 ( 0.63 - 3.92 )                                                            | 0,523                           | 1.44 ( 0.6 - 3.49 )              | 0,638                           | 0.86 ( 0.39 - 1.9 )               | 0,873                           |
| NEFA_17_2         | 1.73 ( 0.69 - 4.32 )                                                            | 0,439                           | 1.1 ( 0.45 - 2.69 )              | 0,923                           | 0.82 ( 0.37 - 1.8 )               | 0,870                           |
| NEFA_18_0         | 1.55 ( 0.61 - 3.93 )                                                            | 0,542                           | 1.25 ( 0.51 - 3.07 )             | 0,801                           | 0.82 ( 0.37 - 1.81 )              | 0,870                           |
| NEFA_18_1         | 1.36 ( 0.54 - 3.43 )                                                            | 0,703                           | 1.37 ( 0.56 - 3.34 )             | 0,707                           | 1.07 ( 0.49 - 2.38 )              | 0,955                           |
| NEFA_18_2         | 1.57 ( 0.63 - 3.91 )                                                            | 0,523                           | 1.12 ( 0.46 - 2.72 )             | 0,910                           | 0.71 ( 0.32 - 1.56 )              | 0,656                           |
| NEFA_18_3         | 1.9 ( 0.76 - 4.73 )                                                             | 0,356                           | 1.37 ( 0.57 - 3.32 )             | 0,705                           | 0.64 ( 0.29 - 1.41 )              | 0,498                           |
| NEFA_19_1         | 1.24 ( 0.5 - 3.09 )                                                             | 0,804                           | 1.07 ( 0.45 - 2.58 )             | 0,960                           | 0.82 ( 0.38 - 1.8 )               | 0,870                           |
| NEFA_20_1         | 1.6 ( 0.63 - 4.02 )                                                             | 0,520                           | 1.15 ( 0.47 - 2.81 )             | 0,889                           | 1.16 ( 0.52 - 2.57 )              | 0,873                           |
| NEFA_20_2         | 1.26 ( 0.5 - 3.17 )                                                             | 0,784                           | 1.3 ( 0.53 - 3.17 )              | 0,755                           | 1.18 ( 0.53 - 2.61 )              | 0,873                           |
| NEFA_20_3         | 2.69 ( 1.04 - 6.98 )                                                            | 0,166                           | 3.08 ( 1.23 - 7.7 )              | 0,149                           | 1.77 ( 0.78 - 4.01 )              | 0,399                           |
| NEFA_20_4         | 2.19 ( 0.87 - 5.47 )                                                            | 0,257                           | 1.99 ( 0.82 - 4.85 )             | 0,373                           | 1.71 ( 0.78 - 3.76 )              | 0,413                           |



|                 |                        |        |                       |        |                       |        |
|-----------------|------------------------|--------|-----------------------|--------|-----------------------|--------|
| NEFA_20_5       | 2.35 ( 0.93 - 5.94 )   | 0,213  | 1.49 ( 0.61 - 3.67 )  | 0,610  | 1.65 ( 0.75 - 3.64 )  | 0,458  |
| NEFA_22_3       | 1.48 ( 0.59 - 3.73 )   | 0,597  | 2.6 ( 1.06 - 6.35 )   | 0,207  | 2.44 ( 1.1 - 5.43 )   | 0,142  |
| NEFA_22_4       | 2.5 ( 0.97 - 6.43 )    | 0,191  | 2.85 ( 1.15 - 7.09 )  | 0,174  | 2 ( 0.88 - 4.5 )      | 0,303  |
| NEFA_22_5       | 2.2 ( 0.87 - 5.55 )    | 0,257  | 1.81 ( 0.74 - 4.44 )  | 0,416  | 1.58 ( 0.71 - 3.52 )  | 0,498  |
| NEFA_22_6       | 1.77 ( 0.7 - 4.48 )    | 0,422  | 1.29 ( 0.52 - 3.19 )  | 0,755  | 1.27 ( 0.57 - 2.83 )  | 0,821  |
| NEFA_24_0       | 2.36 ( 0.96 - 5.82 )   | 0,193  | 2.08 ( 0.86 - 5.03 )  | 0,325  | 0.9 ( 0.41 - 1.95 )   | 0,909  |
| NEFA_24_1       | 1.1 ( 0.44 - 2.73 )    | 0,914  | 0.75 ( 0.31 - 1.83 )  | 0,745  | 0.99 ( 0.45 - 2.18 )  | 0,993  |
| NEFA_24_2       | 1.01 ( 0.39 - 2.58 )   | 0,990  | 1.46 ( 0.59 - 3.59 )  | 0,638  | 1.43 ( 0.64 - 3.19 )  | 0,640  |
| NEFA_24_4       | 3.18 ( 1.27 - 7.96 )   | 0,077  | 2.83 ( 1.17 - 6.86 )  | 0,169  | 2.58 ( 1.17 - 5.66 )  | 0,126  |
| NEFA_24_5       | 3.49 ( 1.38 - 8.8 )    | 0,052  | 2.48 ( 1.01 - 6.07 )  | 0,208  | 3.72 ( 1.69 - 8.21 )  | 0,030* |
| NEFA_26_0       | 3.71 ( 1.5 - 9.18 )    | 0,041  | 1.81 ( 0.75 - 4.37 )  | 0,416  | 1.64 ( 0.75 - 3.57 )  | 0,458  |
| NEFA_26_1       | 2.02 ( 0.8 - 5.09 )    | 0,320  | 2.53 ( 1.03 - 6.2 )   | 0,208  | 1.88 ( 0.85 - 4.16 )  | 0,325  |
| NEFA_26_2       | 1.43 ( 0.55 - 3.71 )   | 0,651  | 1.76 ( 0.71 - 4.38 )  | 0,436  | 1.4 ( 0.63 - 3.14 )   | 0,660  |
| lyso.PC.a.C14.0 | 14.36 ( 5.71 - 36.13 ) | 0,000* | 8.73 ( 3.51 - 21.7 )  | 0,001* | 5.74 ( 2.57 - 12.83 ) | 0,005* |
| lyso.PC.a.C16.0 | 3.67 ( 1.43 - 9.45 )   | 0,049* | 4.91 ( 1.97 - 12.28 ) | 0,028* | 2.64 ( 1.17 - 5.96 )  | 0,127  |
| lyso.PC.a.C16.1 | 5.19 ( 1.97 - 13.68 )  | 0,011* | 6.23 ( 2.46 - 15.82 ) | 0,009* | 4.9 ( 2.15 - 11.16 )  | 0,011* |
| lyso.PC.a.C18.0 | 2.01 ( 0.78 - 5.18 )   | 0,342  | 3.84 ( 1.54 - 9.54 )  | 0,072  | 1.8 ( 0.81 - 4.04 )   | 0,373  |
| lyso.PC.a.C18.1 | 5.45 ( 2.18 - 13.63 )  | 0,005* | 3 ( 1.22 - 7.37 )     | 0,149  | 1.93 ( 0.87 - 4.28 )  | 0,306  |
| lyso.PC.a.C18.2 | 5.44 ( 2.17 - 13.66 )  | 0,005* | 2.17 ( 0.89 - 5.28 )  | 0,293  | 1.37 ( 0.62 - 3.02 )  | 0,690  |
| lyso.PC.a.C18.3 | 5.96 ( 2.45 - 14.48 )  | 0,003* | 2.16 ( 0.9 - 5.18 )   | 0,293  | 2.86 ( 1.33 - 6.19 )  | 0,073  |
| lyso.PC.a.C20.3 | 8.33 ( 3.34 - 20.78 )  | 0,000* | 6.94 ( 2.84 - 16.96 ) | 0,002* | 4.94 ( 2.25 - 10.88 ) | 0,008  |
| lyso.PC.a.C20.4 | 5.81 ( 2.31 - 14.62 )  | 0,004* | 4.87 ( 2 - 11.88 )    | 0,027* | 2.48 ( 1.12 - 5.47 )  | 0,135  |
| lyso.PC.a.C20.5 | 2.61 ( 1.03 - 6.6 )    | 0,167  | 1.3 ( 0.53 - 3.14 )   | 0,755  | 2.3 ( 1.05 - 5.02 )   | 0,159  |
| lyso.PC.a.C22.6 | 2.83 ( 1.12 - 7.14 )   | 0,118  | 1.64 ( 0.67 - 4.01 )  | 0,514  | 1.24 ( 0.56 - 2.73 )  | 0,857  |
| lyso.PC.e.C16.0 | 2.84 ( 1.12 - 7.21 )   | 0,118  | 2.95 ( 1.19 - 7.28 )  | 0,159  | 1.99 ( 0.89 - 4.44 )  | 0,303  |
| lyso.PC.e.C18.0 | 0.88 ( 0.35 - 2.22 )   | 0,890  | 1.74 ( 0.71 - 4.24 )  | 0,436  | 1.27 ( 0.58 - 2.8 )   | 0,821  |
| lyso.PC.e.C18.1 | 2.54 ( 0.98 - 6.63 )   | 0,191  | 1.3 ( 0.51 - 3.29 )   | 0,755  | 1.56 ( 0.69 - 3.55 )  | 0,519  |
| PC.aa.C30.0     | 6.15 ( 2.46 - 15.34 )  | 0,003* | 3.06 ( 1.25 - 7.52 )  | 0,149  | 2.37 ( 1.07 - 5.22 )  | 0,155  |
| PC.aa.C30.3     | 1.16 ( 0.46 - 2.91 )   | 0,879  | 1.82 ( 0.75 - 4.42 )  | 0,416  | 0.87 ( 0.39 - 1.92 )  | 0,876  |
| PC.aa.C32.0     | 3.84 ( 1.51 - 9.78 )   | 0,041* | 2.63 ( 1.06 - 6.5 )   | 0,207  | 1.79 ( 0.8 - 4.01 )   | 0,378  |
| PC.aa.C32.1     | 5.44 ( 2.13 - 13.89 )  | 0,006* | 3.82 ( 1.54 - 9.47 )  | 0,072  | 3.94 ( 1.77 - 8.75 )  | 0,023* |
| PC.aa.C32.2     | 6.56 ( 2.61 - 16.49 )  | 0,003* | 2.8 ( 1.14 - 6.87 )   | 0,174  | 2.55 ( 1.15 - 5.63 )  | 0,129  |
| PC.aa.C32.3     | 1.42 ( 0.54 - 3.71 )   | 0,668  | 1.8 ( 0.72 - 4.54 )   | 0,428  | 1.17 ( 0.52 - 2.63 )  | 0,873  |
| PC.aa.C34.1     | 3.14 ( 1.24 - 7.97 )   | 0,083  | 3.29 ( 1.35 - 8.04 )  | 0,104  | 2.85 ( 1.29 - 6.31 )  | 0,084  |
| PC.aa.C34.2     | 2.31 ( 0.9 - 5.89 )    | 0,237  | 1.9 ( 0.78 - 4.68 )   | 0,390  | 1.48 ( 0.67 - 3.3 )   | 0,596  |
| PC.aa.C34.3     | 3.22 ( 1.27 - 8.2 )    | 0,077  | 2 ( 0.81 - 4.94 )     | 0,377  | 1.89 ( 0.85 - 4.21 )  | 0,325  |
| PC.aa.C34.4     | 7.95 ( 3.23 - 19.53 )  | 0,000* | 3.8 ( 1.57 - 9.19 )   | 0,072  | 2.72 ( 1.24 - 5.97 )  | 0,094  |
| PC.aa.C34.5     | 4.64 ( 1.81 - 11.95 )  | 0,016* | 1.94 ( 0.77 - 4.88 )  | 0,390  | 1.88 ( 0.84 - 4.23 )  | 0,343  |
| PC.aa.C36.0     | 1.21 ( 0.47 - 3.15 )   | 0,831  | 1.7 ( 0.67 - 4.32 )   | 0,494  | 1.18 ( 0.52 - 2.68 )  | 0,873  |
| PC.aa.C36.1     | 4.12 ( 1.65 - 10.3 )   | 0,026* | 2.4 ( 0.98 - 5.88 )   | 0,233  | 2.28 ( 1.03 - 5.04 )  | 0,170  |
| PC.aa.C36.2     | 2.43 ( 0.95 - 6.22 )   | 0,193  | 1.82 ( 0.74 - 4.51 )  | 0,416  | 1.4 ( 0.63 - 3.12 )   | 0,660  |
| PC.aa.C36.3     | 3.26 ( 1.27 - 8.37 )   | 0,077  | 2.75 ( 1.11 - 6.83 )  | 0,185  | 2.57 ( 1.16 - 5.71 )  | 0,129  |
| PC.aa.C36.4     | 3.51 ( 1.39 - 8.84 )   | 0,052  | 3.71 ( 1.51 - 9.1 )   | 0,074  | 2.47 ( 1.11 - 5.49 )  | 0,135  |

|              |                       |        |                       |        |                      |        |
|--------------|-----------------------|--------|-----------------------|--------|----------------------|--------|
| PC.aa.C36.5  | 4.65 ( 1.85 - 11.68 ) | 0,013* | 1.84 ( 0.74 - 4.54 )  | 0,416  | 3.07 ( 1.39 - 6.78 ) | 0,063  |
| PC.aa.C36.6  | 4.56 ( 1.79 - 11.61 ) | 0,016* | 2.28 ( 0.91 - 5.69 )  | 0,283  | 2.94 ( 1.32 - 6.58 ) | 0,080  |
| PC.aa.C38.0  | 1.2 ( 0.46 - 3.14 )   | 0,839  | 1.13 ( 0.44 - 2.88 )  | 0,910  | 1.01 ( 0.44 - 2.28 ) | 0,993  |
| PC.aa.C38.2  | 2.57 ( 0.99 - 6.63 )  | 0,182  | 2.65 ( 1.06 - 6.65 )  | 0,207  | 2.34 ( 1.04 - 5.26 ) | 0,170  |
| PC.aa.C38.3  | 3.91 ( 1.51 - 10.11 ) | 0,042* | 4.77 ( 1.89 - 12.02 ) | 0,033* | 4.1 ( 1.82 - 9.25 )  | 0,023* |
| PC.aa.C38.4  | 2.42 ( 0.96 - 6.14 )  | 0,193  | 3.64 ( 1.47 - 8.99 )  | 0,078  | 2.4 ( 1.07 - 5.37 )  | 0,155  |
| PC.aa.C38.5  | 2.59 ( 1.03 - 6.47 )  | 0,167  | 2.66 ( 1.09 - 6.48 )  | 0,195  | 3.34 ( 1.52 - 7.36 ) | 0,063  |
| PC.aa.C38.6  | 1.5 ( 0.57 - 3.93 )   | 0,600  | 1.52 ( 0.6 - 3.89 )   | 0,610  | 1.84 ( 0.8 - 4.21 )  | 0,372  |
| PC.aa.C40.0  | 1.79 ( 0.69 - 4.69 )  | 0,426  | 0.98 ( 0.38 - 2.5 )   | 0,974  | 0.93 ( 0.41 - 2.1 )  | 0,955  |
| PC.aa.C40.1  | 1.81 ( 0.71 - 4.63 )  | 0,412  | 2.04 ( 0.82 - 5.07 )  | 0,372  | 1.17 ( 0.52 - 2.61 ) | 0,873  |
| PC.aa.C40.2  | 4.1 ( 1.63 - 10.31 )  | 0,027* | 1.79 ( 0.73 - 4.38 )  | 0,421  | 2.46 ( 1.12 - 5.44 ) | 0,135  |
| PC.aa.C40.3  | 2.58 ( 1.02 - 6.53 )  | 0,168  | 1.93 ( 0.78 - 4.77 )  | 0,390  | 2.46 ( 1.11 - 5.48 ) | 0,135  |
| PC.aa.C40.4  | 3.69 ( 1.46 - 9.32 )  | 0,046* | 4.39 ( 1.79 - 10.77 ) | 0,037* | 4 ( 1.81 - 8.83 )    | 0,023* |
| PC.aa.C40.5  | 2.04 ( 0.82 - 5.05 )  | 0,307  | 3.5 ( 1.45 - 8.43 )   | 0,078  | 3.08 ( 1.41 - 6.74 ) | 0,063  |
| PC.aa.C40.6  | 2.04 ( 0.79 - 5.25 )  | 0,329  | 1.97 ( 0.78 - 4.95 )  | 0,390  | 2.34 ( 1.04 - 5.3 )  | 0,170  |
| PC.aa.C42.0  | 1.13 ( 0.45 - 2.86 )  | 0,890  | 1.04 ( 0.42 - 2.58 )  | 0,968  | 1.61 ( 0.73 - 3.54 ) | 0,495  |
| PC.aa.C42.5  | 1.38 ( 0.55 - 3.46 )  | 0,694  | 0.96 ( 0.39 - 2.35 )  | 0,968  | 1.27 ( 0.58 - 2.78 ) | 0,821  |
| PC.aa.C43.6  | 0.88 ( 0.34 - 2.23 )  | 0,885  | 1.31 ( 0.53 - 3.25 )  | 0,755  | 1.22 ( 0.55 - 2.71 ) | 0,870  |
| PC.aa.C44.12 | 1.3 ( 0.51 - 3.32 )   | 0,765  | 1.75 ( 0.7 - 4.37 )   | 0,436  | 1.58 ( 0.7 - 3.55 )  | 0,498  |
| PC.ae.C30.0  | 3.85 ( 1.53 - 9.68 )  | 0,039  | 2.38 ( 0.97 - 5.85 )  | 0,233  | 1.96 ( 0.89 - 4.33 ) | 0,303  |
| PC.ae.C32.0  | 2.54 ( 1 - 6.42 )     | 0,178  | 2.53 ( 1.04 - 6.19 )  | 0,208  | 1.91 ( 0.87 - 4.23 ) | 0,307  |
| PC.ae.C32.1  | 1.94 ( 0.75 - 4.99 )  | 0,356  | 2.52 ( 1.02 - 6.26 )  | 0,208  | 1.18 ( 0.52 - 2.64 ) | 0,873  |
| PC.ae.C32.2  | 1.58 ( 0.62 - 3.97 )  | 0,523  | 1.43 ( 0.59 - 3.48 )  | 0,654  | 0.75 ( 0.34 - 1.66 ) | 0,742  |
| PC.ae.C34.0  | 2.81 ( 1.11 - 7.1 )   | 0,120  | 2.56 ( 1.04 - 6.27 )  | 0,208  | 1.71 ( 0.77 - 3.78 ) | 0,417  |
| PC.ae.C34.1  | 2.22 ( 0.88 - 5.63 )  | 0,257  | 2.1 ( 0.85 - 5.15 )   | 0,325  | 1.82 ( 0.82 - 4.05 ) | 0,354  |
| PC.ae.C34.2  | 1.63 ( 0.63 - 4.23 )  | 0,514  | 1.52 ( 0.61 - 3.8 )   | 0,608  | 1.15 ( 0.51 - 2.6 )  | 0,884  |
| PC.ae.C34.3  | 1.66 ( 0.67 - 4.14 )  | 0,473  | 1.63 ( 0.67 - 3.92 )  | 0,514  | 0.86 ( 0.39 - 1.9 )  | 0,873  |
| PC.ae.C34.4  | 1.84 ( 0.72 - 4.71 )  | 0,399  | 1.38 ( 0.56 - 3.42 )  | 0,705  | 1.49 ( 0.66 - 3.32 ) | 0,596  |
| PC.ae.C36.0  | 0.97 ( 0.38 - 2.46 )  | 0,983  | 1.79 ( 0.73 - 4.4 )   | 0,421  | 1.09 ( 0.49 - 2.43 ) | 0,945  |
| PC.ae.C36.1  | 1.83 ( 0.72 - 4.64 )  | 0,399  | 2.45 ( 0.99 - 6.05 )  | 0,225  | 2.53 ( 1.14 - 5.6 )  | 0,134  |
| PC.ae.C36.2  | 1.12 ( 0.43 - 2.91 )  | 0,902  | 1.04 ( 0.42 - 2.61 )  | 0,968  | 1.07 ( 0.48 - 2.41 ) | 0,959  |
| PC.ae.C36.3  | 1.88 ( 0.74 - 4.76 )  | 0,381  | 1.78 ( 0.72 - 4.4 )   | 0,428  | 1.84 ( 0.83 - 4.09 ) | 0,351  |
| PC.ae.C36.4  | 2.52 ( 1.01 - 6.27 )  | 0,175  | 4.2 ( 1.73 - 10.2 )   | 0,040* | 2.19 ( 1 - 4.81 )    | 0,200  |
| PC.ae.C36.5  | 2.02 ( 0.81 - 5 )     | 0,317  | 2.22 ( 0.92 - 5.39 )  | 0,283  | 1.42 ( 0.65 - 3.11 ) | 0,640  |
| PC.ae.C38.0  | 1.64 ( 0.63 - 4.26 )  | 0,513  | 1.03 ( 0.41 - 2.6 )   | 0,968  | 1.59 ( 0.7 - 3.59 )  | 0,498  |
| PC.ae.C38.2  | 1.99 ( 0.76 - 5.18 )  | 0,352  | 2.35 ( 0.93 - 5.93 )  | 0,271  | 1.31 ( 0.57 - 2.97 ) | 0,800  |
| PC.ae.C38.3  | 2.5 ( 0.97 - 6.42 )   | 0,191  | 3.6 ( 1.44 - 8.97 )   | 0,081  | 3.11 ( 1.39 - 6.98 ) | 0,063  |
| PC.ae.C38.4  | 1.94 ( 0.78 - 4.82 )  | 0,346  | 3.08 ( 1.27 - 7.47 )  | 0,137  | 1.93 ( 0.88 - 4.25 ) | 0,306  |
| PC.ae.C38.5  | 1.67 ( 0.67 - 4.19 )  | 0,468  | 2.26 ( 0.93 - 5.52 )  | 0,276  | 1.57 ( 0.71 - 3.46 ) | 0,498  |
| PC.ae.C38.6  | 1.72 ( 0.67 - 4.38 )  | 0,454  | 1.77 ( 0.71 - 4.43 )  | 0,436  | 1.59 ( 0.71 - 3.54 ) | 0,498  |
| PC.ae.C40.0  | 1.79 ( 0.67 - 4.73 )  | 0,439  | 1.15 ( 0.45 - 2.97 )  | 0,892  | 1.48 ( 0.64 - 3.43 ) | 0,628  |
| PC.ae.C40.1  | 2.97 ( 1.13 - 7.8 )   | 0,118  | 1.33 ( 0.52 - 3.42 )  | 0,755  | 1.74 ( 0.76 - 3.98 ) | 0,422  |
| PC.ae.C40.2  | 1.22 ( 0.48 - 3.14 )  | 0,824  | 0.97 ( 0.39 - 2.42 )  | 0,968  | 2.13 ( 0.96 - 4.74 ) | 0,230  |
| PC.ae.C40.3  | 2.08 ( 0.8 - 5.37 )   | 0,318  | 2.25 ( 0.89 - 5.69 )  | 0,293  | 1.63 ( 0.72 - 3.7 )  | 0,498  |

|              |                      |       |                      |       |                      |        |
|--------------|----------------------|-------|----------------------|-------|----------------------|--------|
| PC.ae.C40.4  | 2.18 ( 0.86 - 5.53 ) | 0,263 | 3.52 ( 1.43 - 8.7 )  | 0,081 | 2.04 ( 0.91 - 4.57 ) | 0,284  |
| PC.ae.C40.5  | 1.14 ( 0.45 - 2.91 ) | 0,885 | 1.55 ( 0.63 - 3.84 ) | 0,579 | 1.61 ( 0.72 - 3.6 )  | 0,498  |
| PC.ae.C40.6  | 1.02 ( 0.39 - 2.63 ) | 0,988 | 1.22 ( 0.49 - 3.06 ) | 0,831 | 1.48 ( 0.65 - 3.34 ) | 0,613  |
| PC.ae.C42.1  | 2.17 ( 0.83 - 5.65 ) | 0,286 | 2.25 ( 0.88 - 5.71 ) | 0,293 | 1.6 ( 0.71 - 3.64 )  | 0,498  |
| PC.ae.C42.3  | 0.86 ( 0.33 - 2.26 ) | 0,881 | 0.64 ( 0.25 - 1.62 ) | 0,579 | 1.17 ( 0.51 - 2.66 ) | 0,873  |
| PC.ae.C42.4  | 2.18 ( 0.86 - 5.56 ) | 0,263 | 2.17 ( 0.88 - 5.38 ) | 0,303 | 1.94 ( 0.87 - 4.31 ) | 0,306  |
| PC.ae.C42.5  | 1.25 ( 0.49 - 3.18 ) | 0,804 | 1.74 ( 0.7 - 4.32 )  | 0,436 | 1.79 ( 0.8 - 4.01 )  | 0,378  |
| PC.ae.C42.6  | 1.02 ( 0.4 - 2.62 )  | 0,988 | 0.95 ( 0.38 - 2.37 ) | 0,968 | 1.16 ( 0.52 - 2.59 ) | 0,873  |
| SM.a.C30.1   | 2.27 ( 0.9 - 5.75 )  | 0,241 | 2.53 ( 1.03 - 6.2 )  | 0,208 | 1.93 ( 0.88 - 4.24 ) | 0,306  |
| SM.a.C32.1   | 1.84 ( 0.72 - 4.7 )  | 0,399 | 2.41 ( 0.98 - 5.94 ) | 0,233 | 2 ( 0.9 - 4.45 )     | 0,297  |
| SM.a.C32.2   | 1.86 ( 0.7 - 4.93 )  | 0,412 | 3.18 ( 1.25 - 8.11 ) | 0,149 | 3.17 ( 1.4 - 7.19 )  | 0,063  |
| SM.a.C33.1   | 1.02 ( 0.39 - 2.63 ) | 0,988 | 1.54 ( 0.62 - 3.8 )  | 0,587 | 1.27 ( 0.57 - 2.84 ) | 0,821  |
| SM.a.C34.1   | 1.01 ( 0.39 - 2.63 ) | 0,988 | 1.63 ( 0.65 - 4.09 ) | 0,531 | 1.3 ( 0.57 - 2.93 )  | 0,801  |
| SM.a.C34.2   | 1.12 ( 0.41 - 3.05 ) | 0,910 | 2 ( 0.76 - 5.29 )    | 0,390 | 1.67 ( 0.71 - 3.9 )  | 0,495  |
| SM.a.C35.0   | 0.77 ( 0.3 - 1.97 )  | 0,765 | 0.88 ( 0.36 - 2.18 ) | 0,908 | 1.25 ( 0.56 - 2.78 ) | 0,846  |
| SM.a.C35.1   | 0.37 ( 0.14 - 0.98 ) | 0,168 | 0.83 ( 0.33 - 2.09 ) | 0,841 | 0.73 ( 0.33 - 1.65 ) | 0,711  |
| SM.a.C36.1   | 0.74 ( 0.28 - 1.96 ) | 0,738 | 1.46 ( 0.57 - 3.75 ) | 0,648 | 1 ( 0.44 - 2.3 )     | 0,993  |
| SM.a.C36.2   | 0.43 ( 0.16 - 1.18 ) | 0,263 | 1.19 ( 0.45 - 3.16 ) | 0,871 | 0.88 ( 0.37 - 2.07 ) | 0,897  |
| SM.a.C36.3   | 0.76 ( 0.28 - 2.06 ) | 0,765 | 0.88 ( 0.34 - 2.31 ) | 0,910 | 0.99 ( 0.43 - 2.31 ) | 0,993  |
| SM.a.C37.1   | 1.22 ( 0.47 - 3.17 ) | 0,824 | 1.29 ( 0.51 - 3.22 ) | 0,755 | 2.18 ( 0.98 - 4.85 ) | 0,214  |
| SM.a.C38.2   | 1.29 ( 0.5 - 3.36 )  | 0,768 | 1.9 ( 0.77 - 4.71 )  | 0,390 | 1.3 ( 0.58 - 2.9 )   | 0,800  |
| SM.a.C38.3   | 1.24 ( 0.48 - 3.16 ) | 0,810 | 1.49 ( 0.61 - 3.65 ) | 0,610 | 0.96 ( 0.44 - 2.13 ) | 0,985  |
| SM.a.C39.1   | 2.2 ( 0.83 - 5.83 )  | 0,286 | 2.26 ( 0.89 - 5.76 ) | 0,293 | 2.32 ( 1.02 - 5.29 ) | 0,180  |
| SM.a.C39.2   | 0.73 ( 0.28 - 1.93 ) | 0,723 | 0.76 ( 0.3 - 1.91 )  | 0,755 | 1.21 ( 0.54 - 2.73 ) | 0,873  |
| SM.a.C40.2   | 1.88 ( 0.73 - 4.83 ) | 0,384 | 2.83 ( 1.14 - 7 )    | 0,174 | 2.02 ( 0.91 - 4.5 )  | 0,290  |
| SM.a.C40.5   | 3.42 ( 1.36 - 8.59 ) | 0,056 | 2.05 ( 0.83 - 5.03 ) | 0,357 | 4.07 ( 1.86 - 8.9 )  | 0,023* |
| SM.a.C41.1   | 2.9 ( 1.14 - 7.36 )  | 0,111 | 1.94 ( 0.79 - 4.72 ) | 0,390 | 1.71 ( 0.78 - 3.75 ) | 0,413  |
| SM.a.C41.2   | 1.33 ( 0.52 - 3.41 ) | 0,744 | 1.03 ( 0.42 - 2.54 ) | 0,968 | 1.99 ( 0.9 - 4.4 )   | 0,300  |
| SM.a.C42.1   | 1.51 ( 0.6 - 3.82 )  | 0,579 | 1.06 ( 0.43 - 2.6 )  | 0,968 | 1.3 ( 0.59 - 2.86 )  | 0,800  |
| SM.a.C42.2   | 1.09 ( 0.42 - 2.84 ) | 0,928 | 0.85 ( 0.34 - 2.16 ) | 0,875 | 1.42 ( 0.63 - 3.22 ) | 0,656  |
| SM.a.C42.3   | 1 ( 0.38 - 2.61 )    | 0,992 | 1.56 ( 0.62 - 3.95 ) | 0,579 | 1.59 ( 0.7 - 3.6 )   | 0,498  |
| SM.a.C42.4   | 2.4 ( 0.95 - 6.03 )  | 0,193 | 2.78 ( 1.13 - 6.81 ) | 0,174 | 1.95 ( 0.88 - 4.33 ) | 0,306  |
| SM.a.C42.6   | 1.96 ( 0.75 - 5.11 ) | 0,356 | 1.95 ( 0.77 - 4.94 ) | 0,390 | 1.94 ( 0.85 - 4.43 ) | 0,319  |
| SM.a.C43.1   | 1.59 ( 0.61 - 4.13 ) | 0,523 | 1.07 ( 0.42 - 2.69 ) | 0,966 | 1.05 ( 0.47 - 2.37 ) | 0,973  |
| SM.a.C43.2   | 1.17 ( 0.46 - 2.98 ) | 0,874 | 1.22 ( 0.49 - 3.04 ) | 0,831 | 0.93 ( 0.42 - 2.08 ) | 0,955  |
| SM.a.C44.6   | 1.39 ( 0.54 - 3.6 )  | 0,694 | 1.63 ( 0.65 - 4.12 ) | 0,534 | 1.86 ( 0.82 - 4.18 ) | 0,351  |
| SM.e.C36.2   | 0.47 ( 0.18 - 1.27 ) | 0,320 | 0.73 ( 0.28 - 1.87 ) | 0,720 | 0.89 ( 0.39 - 2.05 ) | 0,913  |
| SM.e.C38.3   | 0.97 ( 0.39 - 2.45 ) | 0,983 | 1.28 ( 0.53 - 3.13 ) | 0,755 | 1.02 ( 0.46 - 2.24 ) | 0,993  |
| SM.e.C40.5   | 1.49 ( 0.6 - 3.71 )  | 0,589 | 1.85 ( 0.76 - 4.51 ) | 0,398 | 1.11 ( 0.51 - 2.43 ) | 0,913  |
| Carn         | 1.14 ( 0.44 - 2.95 ) | 0,885 | 1.93 ( 0.78 - 4.77 ) | 0,390 | 2.5 ( 1.13 - 5.56 )  | 0,135  |
| Carn.a.C10.0 | 0.47 ( 0.19 - 1.18 ) | 0,274 | 0.83 ( 0.34 - 2.04 ) | 0,834 | 1.03 ( 0.46 - 2.29 ) | 0,985  |
| Carn.a.C10.1 | 0.56 ( 0.22 - 1.43 ) | 0,417 | 0.6 ( 0.24 - 1.5 )   | 0,514 | 0.84 ( 0.37 - 1.87 ) | 0,873  |
| Carn.a.C12.0 | 0.68 ( 0.27 - 1.72 ) | 0,604 | 0.82 ( 0.33 - 2.01 ) | 0,831 | 1.17 ( 0.53 - 2.58 ) | 0,873  |
| Carn.a.C14.1 | 0.61 ( 0.24 - 1.52 ) | 0,487 | 0.65 ( 0.26 - 1.59 ) | 0,579 | 1 ( 0.45 - 2.21 )    | 0,993  |
| Carn.a.C14.2 | 0.52 ( 0.21 - 1.3 )  | 0,356 | 0.56 ( 0.23 - 1.35 ) | 0,416 | 0.97 ( 0.44 - 2.13 ) | 0,985  |

|                                                  |                      |        |                      |       |                      |       |
|--------------------------------------------------|----------------------|--------|----------------------|-------|----------------------|-------|
| Carn.a.C15.0                                     | 0.89 ( 0.36 - 2.24 ) | 0,902  | 1 ( 0.41 - 2.42 )    | 0,999 | 1.74 ( 0.79 - 3.83 ) | 0,399 |
| Carn.a.C16.0                                     | 0.74 ( 0.3 - 1.85 )  | 0,720  | 0.84 ( 0.34 - 2.03 ) | 0,838 | 0.89 ( 0.4 - 1.95 )  | 0,897 |
| Carn.a.C16.0.Oxo                                 | 1.11 ( 0.44 - 2.83 ) | 0,910  | 0.96 ( 0.38 - 2.39 ) | 0,968 | 1.03 ( 0.46 - 2.32 ) | 0,985 |
| Carn.a.C16.1                                     | 0.34 ( 0.14 - 0.86 ) | 0,108  | 0.56 ( 0.23 - 1.37 ) | 0,421 | 1.19 ( 0.53 - 2.64 ) | 0,873 |
| Carn.a.C16.2                                     | 0.57 ( 0.23 - 1.41 ) | 0,417  | 0.65 ( 0.27 - 1.56 ) | 0,579 | 1.19 ( 0.54 - 2.61 ) | 0,873 |
| Carn.a.C18.0                                     | 1.21 ( 0.48 - 3.01 ) | 0,830  | 0.51 ( 0.21 - 1.23 ) | 0,377 | 0.99 ( 0.45 - 2.19 ) | 0,993 |
| Carn.a.C18.1                                     | 0.53 ( 0.21 - 1.35 ) | 0,381  | 0.73 ( 0.29 - 1.81 ) | 0,708 | 1.43 ( 0.64 - 3.18 ) | 0,640 |
| Carn.a.C18.2                                     | 0.68 ( 0.27 - 1.69 ) | 0,594  | 0.91 ( 0.37 - 2.21 ) | 0,923 | 0.94 ( 0.43 - 2.07 ) | 0,972 |
| Carn.a.C18.2.OH                                  | 0.93 ( 0.38 - 2.31 ) | 0,928  | 0.87 ( 0.36 - 2.1 )  | 0,887 | 1.22 ( 0.55 - 2.68 ) | 0,870 |
| Carn.a.C2.0                                      | 1.69 ( 0.67 - 4.26 ) | 0,465  | 1.82 ( 0.75 - 4.45 ) | 0,416 | 1.85 ( 0.83 - 4.1 )  | 0,347 |
| Carn.a.C20.0                                     | 1.45 ( 0.57 - 3.65 ) | 0,618  | 1.87 ( 0.77 - 4.53 ) | 0,391 | 0.85 ( 0.38 - 1.87 ) | 0,873 |
| Carn.a.C20.1                                     | 1.58 ( 0.64 - 3.91 ) | 0,520  | 1.03 ( 0.43 - 2.46 ) | 0,968 | 1.38 ( 0.64 - 3.01 ) | 0,660 |
| Carn.a.C20.3                                     | 0.91 ( 0.37 - 2.24 ) | 0,914  | 1.25 ( 0.52 - 2.99 ) | 0,786 | 0.7 ( 0.32 - 1.53 )  | 0,640 |
| Carn.a.C20.4                                     | 0.77 ( 0.31 - 1.92 ) | 0,760  | 1.03 ( 0.42 - 2.48 ) | 0,968 | 0.95 ( 0.43 - 2.09 ) | 0,973 |
| Carn.a.C3.0                                      | 2.9 ( 1.16 - 7.23 )  | 0,107  | 2.28 ( 0.94 - 5.51 ) | 0,263 | 2.32 ( 1.06 - 5.07 ) | 0,159 |
| Carn.a.C3.0.DC                                   | 0.79 ( 0.31 - 2 )    | 0,784  | 1.06 ( 0.43 - 2.62 ) | 0,968 | 1.6 ( 0.72 - 3.58 )  | 0,498 |
| Carn.a.C4.0                                      | 3.54 ( 1.43 - 8.75 ) | 0,046* | 2.36 ( 0.97 - 5.7 )  | 0,233 | 1.9 ( 0.87 - 4.16 )  | 0,306 |
| Carn.a.C5.0                                      | 2.9 ( 1.16 - 7.21 )  | 0,107  | 2.47 ( 1.02 - 6.02 ) | 0,208 | 2.82 ( 1.29 - 6.2 )  | 0,084 |
| Carn.a.C6.0                                      | 0.86 ( 0.34 - 2.18 ) | 0,874  | 1.08 ( 0.44 - 2.67 ) | 0,958 | 1.09 ( 0.49 - 2.42 ) | 0,945 |
| Carn.a.C6.0.OH                                   | 0.58 ( 0.23 - 1.48 ) | 0,448  | 1.22 ( 0.49 - 3.03 ) | 0,831 | 1.75 ( 0.78 - 3.91 ) | 0,406 |
| Carn.a.C8.0                                      | 0.51 ( 0.2 - 1.29 )  | 0,346  | 0.74 ( 0.3 - 1.83 )  | 0,730 | 0.86 ( 0.38 - 1.91 ) | 0,873 |
| Carn.a.C8.1                                      | 0.85 ( 0.33 - 2.19 ) | 0,865  | 1.03 ( 0.41 - 2.6 )  | 0,968 | 0.7 ( 0.31 - 1.59 )  | 0,656 |
| Carn.a.C9.0                                      | 1.63 ( 0.65 - 4.08 ) | 0,504  | 1.29 ( 0.53 - 3.16 ) | 0,755 | 1.68 ( 0.76 - 3.7 )  | 0,436 |
| Asn/Asp                                          | 1.08 ( 0.44 - 2.66 ) | 0,928  | 0.48 ( 0.2 - 1.14 )  | 0,303 | 0.86 ( 0.4 - 1.87 )  | 0,873 |
| Gln/Glu                                          | 1.08 ( 0.43 - 2.72 ) | 0,928  | 0.38 ( 0.15 - 0.92 ) | 0,198 | 0.38 ( 0.17 - 0.83 ) | 0,113 |
| NEFA18.1/NEFA18.0                                | 0.82 ( 0.32 - 2.09 ) | 0,824  | 0.65 ( 0.26 - 1.62 ) | 0,593 | 0.92 ( 0.41 - 2.05 ) | 0,945 |
| NEFA16.1/NEFA16.0                                | 0.44 ( 0.17 - 1.15 ) | 0,257  | 0.66 ( 0.26 - 1.68 ) | 0,610 | 1.21 ( 0.53 - 2.74 ) | 0,873 |
| PC.aa/PC.ae                                      | 3.62 ( 1.42 - 9.24 ) | 0,049  | 2.21 ( 0.9 - 5.46 )  | 0,293 | 2.34 ( 1.06 - 5.17 ) | 0,159 |
| Lyso.PC.a/PC.aa                                  | 1.51 ( 0.58 - 3.91 ) | 0,589  | 1.89 ( 0.77 - 4.62 ) | 0,390 | 1.05 ( 0.47 - 2.34 ) | 0,973 |
| (lyso.PC.a.C16.0 +<br>lyso.PC.a.C18.0)/<br>PC.aa | 0.94 ( 0.36 - 2.46 ) | 0,950  | 1.96 ( 0.79 - 4.86 ) | 0,390 | 1.05 ( 0.47 - 2.35 ) | 0,973 |
| (lyso.PC.a.C18.1 +<br>lyso.PC.a.C18.2)           | 2.43 ( 0.96 - 6.18 ) | 0,193  | 1.18 ( 0.49 - 2.87 ) | 0,856 | 0.79 ( 0.36 - 1.74 ) | 0,821 |
| Carn.a.C.16.0/<br>free Carn                      | 0.65 ( 0.26 - 1.63 ) | 0,542  | 0.58 ( 0.24 - 1.41 ) | 0,436 | 0.49 ( 0.22 - 1.08 ) | 0,268 |
| Carn.a.C2.0/<br>Carn.a.C16.0                     | 1.88 ( 0.75 - 4.73 ) | 0,374  | 1.92 ( 0.78 - 4.7 )  | 0,390 | 1.71 ( 0.78 - 3.76 ) | 0,413 |

Values represent absolute differences in blood pressure (95% confidence interval) and corresponding p-values from linear regression models that reflect the difference in blood pressure (mmHg) per SDS increase in maternal early-pregnancy metabolite concentrations ( $\mu\text{mol/L}$ ) or metabolite ratio. Model includes gestational age at time of measurement, age, parity, pre-pregnancy body mass index, educational level, smoking and folic acid supplementation. AA amino acids, NEFA non-esterified fatty acids, PC.aa diacyl-phosphatidylcholines, PC.ae acyl-alkyl-phosphatidylcholines, lyso.PC.a acyl-lysophosphatidylcholines, lyso.PC.e alkyl-lysophosphatidylcholines, Carn.a acyl-carnitines, SM sphingomyelins  
<sup>a</sup>p-value corrected for multiple hypothesis testing using Benjamin-Hochberg FDR correction.

\*Statistically significant

**Table S9.** Associations of early-pregnancy individual metabolites with diastolic blood pressure in early-, mid- and late pregnancy. Full model, sensitivity analysis excluding women without preexisting hypertension.

|                   | <b>Differences in diastolic blood pressure in mmHg (95% confidence interval)</b> |                                 |                                  |                            |                                   |                                 |
|-------------------|----------------------------------------------------------------------------------|---------------------------------|----------------------------------|----------------------------|-----------------------------------|---------------------------------|
| <b>Metabolite</b> | <b>Early pregnancy<br/>N = 790</b>                                               | <b>P-<br/>value<sup>a</sup></b> | <b>Mid pregnancy<br/>N = 780</b> | <b>P-value<sup>a</sup></b> | <b>Late pregnancy<br/>N = 786</b> | <b>P-<br/>value<sup>a</sup></b> |
| Ala               | 1.1 ( 0.55 - 2.18 )                                                              | 0,843                           | 1.55 ( 0.8 - 3.02 )              | 0,423                      | 2.41 ( 1.29 - 4.51 )              | 0,054                           |
| Arg               | 1.95 ( 0.98 - 3.87 )                                                             | 0,147                           | 1.13 ( 0.58 - 2.2 )              | 0,843                      | 1.78 ( 0.95 - 3.33 )              | 0,136                           |
| Asn               | 0.95 ( 0.47 - 1.88 )                                                             | 0,913                           | 0.84 ( 0.43 - 1.64 )             | 0,776                      | 1.81 ( 0.96 - 3.4 )               | 0,131                           |
| Asp               | 2.69 ( 1.34 - 5.41 )                                                             | 0,038*                          | 1.77 ( 0.91 - 3.43 )             | 0,284                      | 3.15 ( 1.68 - 5.9 )               | 0,009                           |
| Cit               | 0.98 ( 0.47 - 2.04 )                                                             | 0,977                           | 0.73 ( 0.36 - 1.46 )             | 0,599                      | 1.14 ( 0.58 - 2.21 )              | 0,724                           |
| Gln               | 1.31 ( 0.66 - 2.59 )                                                             | 0,545                           | 0.68 ( 0.35 - 1.31 )             | 0,465                      | 0.78 ( 0.42 - 1.47 )              | 0,508                           |
| Glu               | 2.67 ( 1.34 - 5.31 )                                                             | 0,038*                          | 2.02 ( 1.04 - 3.92 )             | 0,208                      | 3.75 ( 2.01 - 6.99 )              | 0,008*                          |
| Gly               | 0.77 ( 0.39 - 1.52 )                                                             | 0,552                           | 0.9 ( 0.47 - 1.72 )              | 0,857                      | 1.6 ( 0.86 - 2.98 )               | 0,212                           |
| His               | 0.99 ( 0.49 - 2 )                                                                | 0,978                           | 0.83 ( 0.42 - 1.64 )             | 0,775                      | 1.98 ( 1.04 - 3.77 )              | 0,103                           |
| Ile               | 0.67 ( 0.34 - 1.35 )                                                             | 0,385                           | 0.83 ( 0.42 - 1.63 )             | 0,775                      | 1.47 ( 0.78 - 2.79 )              | 0,300                           |
| Leu               | 0.79 ( 0.4 - 1.57 )                                                              | 0,595                           | 0.84 ( 0.43 - 1.63 )             | 0,775                      | 1.72 ( 0.92 - 3.21 )              | 0,152                           |
| Lys               | 0.47 ( 0.23 - 0.93 )                                                             | 0,099                           | 1.19 ( 0.61 - 2.31 )             | 0,776                      | 2.21 ( 1.18 - 4.14 )              | 0,064                           |
| Met               | 0.97 ( 0.49 - 1.93 )                                                             | 0,957                           | 0.88 ( 0.45 - 1.71 )             | 0,819                      | 1.27 ( 0.68 - 2.38 )              | 0,513                           |
| Orn               | 0.68 ( 0.34 - 1.36 )                                                             | 0,390                           | 1 ( 0.51 - 1.94 )                | 0,999                      | 2.13 ( 1.13 - 4.01 )              | 0,071                           |
| Phe               | 1.71 ( 0.87 - 3.36 )                                                             | 0,216                           | 1.27 ( 0.66 - 2.44 )             | 0,687                      | 2.08 ( 1.12 - 3.84 )              | 0,071                           |
| Pro               | 0.96 ( 0.49 - 1.9 )                                                              | 0,939                           | 0.81 ( 0.42 - 1.55 )             | 0,715                      | 1.43 ( 0.77 - 2.67 )              | 0,318                           |
| Trp               | 1.11 ( 0.56 - 2.22 )                                                             | 0,821                           | 1.05 ( 0.54 - 2.04 )             | 0,927                      | 1.48 ( 0.79 - 2.76 )              | 0,289                           |
| Ser               | 1.57 ( 0.79 - 3.1 )                                                              | 0,304                           | 0.97 ( 0.5 - 1.85 )              | 0,939                      | 2.1 ( 1.13 - 3.91 )               | 0,071                           |
| Thr               | 0.82 ( 0.41 - 1.66 )                                                             | 0,669                           | 1.04 ( 0.52 - 2.05 )             | 0,939                      | 1.65 ( 0.87 - 3.12 )              | 0,199                           |
| Tyr               | 1.29 ( 0.65 - 2.54 )                                                             | 0,566                           | 0.95 ( 0.49 - 1.83 )             | 0,927                      | 1.62 ( 0.87 - 3.01 )              | 0,202                           |
| Val               | 1.24 ( 0.63 - 2.47 )                                                             | 0,619                           | 0.95 ( 0.49 - 1.82 )             | 0,921                      | 1.72 ( 0.92 - 3.21 )              | 0,152                           |
| Cys               | 0.36 ( 0.18 - 0.73 )                                                             | 0,038*                          | 0.71 ( 0.36 - 1.39 )             | 0,525                      | 0.99 ( 0.52 - 1.89 )              | 0,977                           |
| NEFA_14_0         | 2.16 ( 1.09 - 4.27 )                                                             | 0,094                           | 1.37 ( 0.71 - 2.65 )             | 0,557                      | 1.1 ( 0.59 - 2.05 )               | 0,786                           |
| NEFA_14_1         | 3.23 ( 1.63 - 6.42 )                                                             | 0,019*                          | 2 ( 1.03 - 3.88 )                | 0,208                      | 1.39 ( 0.73 - 2.62 )              | 0,377                           |
| NEFA_15_0         | 2.19 ( 1.11 - 4.31 )                                                             | 0,091                           | 1.49 ( 0.78 - 2.87 )             | 0,443                      | 0.87 ( 0.46 - 1.62 )              | 0,675                           |
| NEFA_16_0         | 2.78 ( 1.4 - 5.52 )                                                              | 0,038                           | 1.72 ( 0.88 - 3.33 )             | 0,309                      | 1.46 ( 0.78 - 2.76 )              | 0,301                           |
| NEFA_16_1         | 3.3 ( 1.66 - 6.56 )                                                              | 0,018*                          | 2.2 ( 1.14 - 4.27 )              | 0,144                      | 2.16 ( 1.15 - 4.06 )              | 0,067                           |
| NEFA_16_2         | 2.62 ( 1.32 - 5.23 )                                                             | 0,043*                          | 1.59 ( 0.81 - 3.09 )             | 0,407                      | 1.62 ( 0.86 - 3.06 )              | 0,208                           |
| NEFA_17_0         | 2.25 ( 1.14 - 4.41 )                                                             | 0,085                           | 1.66 ( 0.86 - 3.19 )             | 0,340                      | 1.17 ( 0.63 - 2.18 )              | 0,646                           |
| NEFA_17_1         | 2.69 ( 1.36 - 5.31 )                                                             | 0,038*                          | 1.94 ( 1.01 - 3.73 )             | 0,217                      | 1.27 ( 0.68 - 2.38 )              | 0,515                           |
| NEFA_17_2         | 1.81 ( 0.91 - 3.59 )                                                             | 0,187                           | 1.08 ( 0.56 - 2.1 )              | 0,878                      | 1.37 ( 0.73 - 2.56 )              | 0,390                           |
| NEFA_18_0         | 2.49 ( 1.25 - 4.97 )                                                             | 0,054                           | 1.27 ( 0.65 - 2.47 )             | 0,704                      | 0.96 ( 0.51 - 1.83 )              | 0,917                           |
| NEFA_18_1         | 2.92 ( 1.48 - 5.79 )                                                             | 0,035*                          | 1.56 ( 0.81 - 3.02 )             | 0,414                      | 1.87 ( 1 - 3.51 )                 | 0,111                           |
| NEFA_18_2         | 2.38 ( 1.21 - 4.69 )                                                             | 0,064                           | 1.16 ( 0.6 - 2.24 )              | 0,793                      | 1.33 ( 0.71 - 2.48 )              | 0,428                           |
| NEFA_18_3         | 1.72 ( 0.87 - 3.4 )                                                              | 0,216                           | 1.09 ( 0.57 - 2.1 )              | 0,872                      | 1.26 ( 0.68 - 2.35 )              | 0,516                           |
| NEFA_19_1         | 2.26 ( 1.15 - 4.44 )                                                             | 0,085                           | 1.45 ( 0.76 - 2.79 )             | 0,468                      | 1.21 ( 0.65 - 2.27 )              | 0,577                           |
| NEFA_20_1         | 2.93 ( 1.47 - 5.81 )                                                             | 0,035*                          | 1.37 ( 0.7 - 2.66 )              | 0,571                      | 2.17 ( 1.16 - 4.09 )              | 0,066                           |
| NEFA_20_2         | 2.73 ( 1.38 - 5.4 )                                                              | 0,038*                          | 2.01 ( 1.04 - 3.88 )             | 0,208                      | 2.29 ( 1.22 - 4.29 )              | 0,064                           |
| NEFA_20_3         | 3.45 ( 1.7 - 7 )                                                                 | 0,018*                          | 2.8 ( 1.43 - 5.52 )              | 0,049*                     | 1.91 ( 1 - 3.66 )                 | 0,109                           |
| NEFA_20_4         | 3.82 ( 1.94 - 7.53 )                                                             | 0,007*                          | 2.02 ( 1.05 - 3.88 )             | 0,208                      | 2.68 ( 1.44 - 4.99 )              | 0,032*                          |

|                 |                      |        |                      |        |                      |        |
|-----------------|----------------------|--------|----------------------|--------|----------------------|--------|
| NEFA_20_5       | 2.08 ( 1.04 - 4.15 ) | 0,113  | 1.2 ( 0.62 - 2.32 )  | 0,775  | 2.09 ( 1.12 - 3.92 ) | 0,071  |
| NEFA_22_3       | 3.09 ( 1.55 - 6.14 ) | 0,027* | 3.01 ( 1.55 - 5.84 ) | 0,047* | 2.4 ( 1.27 - 4.55 )  | 0,054  |
| NEFA_22_4       | 4.51 ( 2.25 - 9.06 ) | 0,005* | 2.82 ( 1.43 - 5.53 ) | 0,049* | 2.73 ( 1.43 - 5.2 )  | 0,033* |
| NEFA_22_5       | 3.99 ( 2.01 - 7.91 ) | 0,007* | 2.18 ( 1.12 - 4.22 ) | 0,150  | 2.25 ( 1.19 - 4.24 ) | 0,064  |
| NEFA_22_6       | 3.56 ( 1.79 - 7.08 ) | 0,012* | 1.77 ( 0.91 - 3.44 ) | 0,284  | 1.99 ( 1.06 - 3.75 ) | 0,096  |
| NEFA_24_0       | 1.25 ( 0.64 - 2.46 ) | 0,608  | 0.9 ( 0.47 - 1.73 )  | 0,858  | 0.95 ( 0.51 - 1.76 ) | 0,883  |
| NEFA_24_1       | 1.51 ( 0.76 - 2.98 ) | 0,349  | 0.79 ( 0.41 - 1.52 ) | 0,691  | 1.7 ( 0.91 - 3.18 )  | 0,158  |
| NEFA_24_2       | 2.46 ( 1.22 - 4.95 ) | 0,061  | 1.44 ( 0.74 - 2.81 ) | 0,493  | 1.62 ( 0.85 - 3.07 ) | 0,212  |
| NEFA_24_4       | 2.8 ( 1.41 - 5.54 )  | 0,036* | 2.58 ( 1.34 - 4.96 ) | 0,058  | 2.19 ( 1.18 - 4.1 )  | 0,064  |
| NEFA_24_5       | 3.85 ( 1.93 - 7.65 ) | 0,007* | 2.99 ( 1.55 - 5.79 ) | 0,047* | 3.15 ( 1.68 - 5.92 ) | 0,009* |
| NEFA_26_0       | 2.54 ( 1.29 - 5 )    | 0,046* | 1.22 ( 0.63 - 2.34 ) | 0,755  | 1.47 ( 0.79 - 2.74 ) | 0,297  |
| NEFA_26_1       | 2.82 ( 1.42 - 5.61 ) | 0,036* | 1.84 ( 0.94 - 3.58 ) | 0,254  | 1.75 ( 0.93 - 3.29 ) | 0,151  |
| NEFA_26_2       | 2.28 ( 1.12 - 4.65 ) | 0,091  | 1.61 ( 0.81 - 3.19 ) | 0,407  | 1.35 ( 0.7 - 2.6 )   | 0,428  |
| lyso.PC.a.C14.0 | 2.33 ( 1.15 - 4.69 ) | 0,085  | 3.44 ( 1.75 - 6.76 ) | 0,047* | 3.07 ( 1.61 - 5.83 ) | 0,015* |
| lyso.PC.a.C16.0 | 1.51 ( 0.74 - 3.07 ) | 0,370  | 2.77 ( 1.41 - 5.44 ) | 0,050  | 3.35 ( 1.77 - 6.37 ) | 0,009* |
| lyso.PC.a.C16.1 | 1.96 ( 0.95 - 4.06 ) | 0,162  | 2.91 ( 1.46 - 5.82 ) | 0,049* | 3.81 ( 1.97 - 7.35 ) | 0,008* |
| lyso.PC.a.C18.0 | 1.33 ( 0.66 - 2.71 ) | 0,540  | 1.91 ( 0.97 - 3.76 ) | 0,241  | 2.29 ( 1.21 - 4.35 ) | 0,064  |
| lyso.PC.a.C18.1 | 1.82 ( 0.91 - 3.64 ) | 0,187  | 1.82 ( 0.94 - 3.54 ) | 0,259  | 2.69 ( 1.44 - 5.03 ) | 0,032* |
| lyso.PC.a.C18.2 | 1.25 ( 0.62 - 2.49 ) | 0,619  | 0.92 ( 0.48 - 1.78 ) | 0,875  | 1.23 ( 0.65 - 2.31 ) | 0,559  |
| lyso.PC.a.C18.3 | 1.13 ( 0.58 - 2.21 ) | 0,794  | 1.08 ( 0.57 - 2.05 ) | 0,885  | 1.89 ( 1.02 - 3.48 ) | 0,103  |
| lyso.PC.a.C20.3 | 2.34 ( 1.17 - 4.65 ) | 0,077  | 2.8 ( 1.44 - 5.43 )  | 0,049* | 2.26 ( 1.21 - 4.24 ) | 0,064  |
| lyso.PC.a.C20.4 | 3.09 ( 1.55 - 6.18 ) | 0,027* | 2.66 ( 1.37 - 5.14 ) | 0,052  | 2.67 ( 1.43 - 5.01 ) | 0,032* |
| lyso.PC.a.C20.5 | 1.25 ( 0.62 - 2.51 ) | 0,618  | 1.41 ( 0.73 - 2.7 )  | 0,515  | 2.02 ( 1.09 - 3.76 ) | 0,079  |
| lyso.PC.a.C22.6 | 1.62 ( 0.81 - 3.24 ) | 0,284  | 1.46 ( 0.76 - 2.83 ) | 0,468  | 1.46 ( 0.78 - 2.74 ) | 0,301  |
| lyso.PC.e.C16.0 | 1.16 ( 0.58 - 2.33 ) | 0,760  | 1.89 ( 0.97 - 3.68 ) | 0,241  | 1.83 ( 0.97 - 3.46 ) | 0,129  |
| lyso.PC.e.C18.0 | 1.01 ( 0.51 - 2.01 ) | 0,978  | 2.08 ( 1.08 - 4 )    | 0,184  | 1.63 ( 0.87 - 3.06 ) | 0,201  |
| lyso.PC.e.C18.1 | 1.8 ( 0.88 - 3.67 )  | 0,210  | 2.01 ( 1.01 - 3.98 ) | 0,217  | 2.25 ( 1.18 - 4.31 ) | 0,064  |
| PC.aa.C30.0     | 2.05 ( 1.03 - 4.08 ) | 0,117  | 1.76 ( 0.91 - 3.41 ) | 0,284  | 1.47 ( 0.78 - 2.77 ) | 0,300  |
| PC.aa.C30.3     | 1.76 ( 0.88 - 3.51 ) | 0,210  | 1.41 ( 0.73 - 2.73 ) | 0,515  | 1.31 ( 0.69 - 2.49 ) | 0,459  |
| PC.aa.C32.0     | 2.89 ( 1.44 - 5.8 )  | 0,036* | 2.22 ( 1.14 - 4.32 ) | 0,144  | 2.41 ( 1.27 - 4.57 ) | 0,054  |
| PC.aa.C32.1     | 2.53 ( 1.26 - 5.11 ) | 0,054  | 2.78 ( 1.42 - 5.44 ) | 0,049  | 2.59 ( 1.36 - 4.92 ) | 0,043  |
| PC.aa.C32.2     | 1.87 ( 0.93 - 3.75 ) | 0,169  | 2.16 ( 1.12 - 4.19 ) | 0,152  | 1.64 ( 0.87 - 3.1 )  | 0,200  |
| PC.aa.C32.3     | 2.19 ( 1.07 - 4.48 ) | 0,104  | 2.13 ( 1.08 - 4.21 ) | 0,184  | 2.4 ( 1.25 - 4.6 )   | 0,060  |
| PC.aa.C34.1     | 2.27 ( 1.13 - 4.53 ) | 0,088  | 2.26 ( 1.17 - 4.38 ) | 0,126  | 2.56 ( 1.36 - 4.82 ) | 0,043* |
| PC.aa.C34.2     | 1.59 ( 0.78 - 3.21 ) | 0,306  | 1.47 ( 0.76 - 2.87 ) | 0,468  | 1.79 ( 0.94 - 3.39 ) | 0,140  |
| PC.aa.C34.3     | 1.55 ( 0.77 - 3.12 ) | 0,333  | 1.87 ( 0.96 - 3.64 ) | 0,241  | 2.03 ( 1.07 - 3.84 ) | 0,087  |
| PC.aa.C34.4     | 2.44 ( 1.24 - 4.81 ) | 0,054  | 2.49 ( 1.3 - 4.78 )  | 0,068  | 1.72 ( 0.92 - 3.21 ) | 0,152  |
| PC.aa.C34.5     | 2.31 ( 1.13 - 4.69 ) | 0,088  | 1.61 ( 0.81 - 3.19 ) | 0,407  | 1.84 ( 0.96 - 3.52 ) | 0,131  |
| PC.aa.C36.0     | 1.83 ( 0.9 - 3.73 )  | 0,195  | 1.71 ( 0.86 - 3.4 )  | 0,335  | 1.76 ( 0.92 - 3.38 ) | 0,152  |
| PC.aa.C36.1     | 2.16 ( 1.09 - 4.29 ) | 0,094  | 1.51 ( 0.78 - 2.93 ) | 0,438  | 2.33 ( 1.24 - 4.37 ) | 0,060  |
| PC.aa.C36.2     | 1.58 ( 0.78 - 3.2 )  | 0,306  | 1.31 ( 0.67 - 2.57 ) | 0,656  | 1.61 ( 0.85 - 3.07 ) | 0,215  |
| PC.aa.C36.3     | 1.75 ( 0.86 - 3.55 ) | 0,221  | 1.88 ( 0.96 - 3.68 ) | 0,241  | 1.84 ( 0.97 - 3.5 )  | 0,128  |
| PC.aa.C36.4     | 2.53 ( 1.27 - 5.05 ) | 0,052  | 2.81 ( 1.45 - 5.42 ) | 0,049  | 2.23 ( 1.18 - 4.21 ) | 0,064  |
| PC.aa.C36.5     | 1.78 ( 0.89 - 3.56 ) | 0,201  | 1.8 ( 0.92 - 3.5 )   | 0,274  | 2.54 ( 1.35 - 4.78 ) | 0,043* |
| PC.aa.C36.6     | 1.44 ( 0.71 - 2.9 )  | 0,430  | 1.81 ( 0.92 - 3.56 ) | 0,274  | 1.94 ( 1.02 - 3.69 ) | 0,103  |

|              |                      |       |                      |       |                      |       |
|--------------|----------------------|-------|----------------------|-------|----------------------|-------|
| PC.aa.C38.0  | 1.4 ( 0.68 - 2.86 )  | 0,468 | 1.19 ( 0.59 - 2.37 ) | 0,776 | 1.97 ( 1.03 - 3.79 ) | 0,103 |
| PC.aa.C38.2  | 1.38 ( 0.68 - 2.8 )  | 0,481 | 1.89 ( 0.96 - 3.72 ) | 0,241 | 1.82 ( 0.96 - 3.48 ) | 0,131 |
| PC.aa.C38.3  | 2.14 ( 1.05 - 4.37 ) | 0,109 | 2.47 ( 1.25 - 4.89 ) | 0,096 | 2.12 ( 1.11 - 4.06 ) | 0,074 |
| PC.aa.C38.4  | 2.77 ( 1.39 - 5.54 ) | 0,038 | 2.54 ( 1.31 - 4.94 ) | 0,068 | 2.3 ( 1.22 - 4.35 )  | 0,064 |
| PC.aa.C38.5  | 2.18 ( 1.1 - 4.33 )  | 0,093 | 2.32 ( 1.21 - 4.47 ) | 0,111 | 2.7 ( 1.44 - 5.05 )  | 0,032 |
| PC.aa.C38.6  | 1.64 ( 0.8 - 3.36 )  | 0,292 | 1.69 ( 0.84 - 3.37 ) | 0,360 | 1.98 ( 1.02 - 3.83 ) | 0,103 |
| PC.aa.C40.0  | 1.91 ( 0.93 - 3.91 ) | 0,170 | 1.06 ( 0.53 - 2.13 ) | 0,921 | 1.59 ( 0.83 - 3.07 ) | 0,236 |
| PC.aa.C40.1  | 2.61 ( 1.3 - 5.26 )  | 0,046 | 1.48 ( 0.75 - 2.91 ) | 0,468 | 1.38 ( 0.73 - 2.62 ) | 0,388 |
| PC.aa.C40.2  | 2.69 ( 1.35 - 5.36 ) | 0,038 | 1.56 ( 0.81 - 3.04 ) | 0,414 | 1.93 ( 1.03 - 3.63 ) | 0,103 |
| PC.aa.C40.3  | 2.88 ( 1.44 - 5.75 ) | 0,036 | 2.22 ( 1.14 - 4.32 ) | 0,144 | 1.92 ( 1.02 - 3.63 ) | 0,106 |
| PC.aa.C40.4  | 3.34 ( 1.68 - 6.64 ) | 0,018 | 3.1 ( 1.6 - 6.01 )   | 0,047 | 2.34 ( 1.24 - 4.39 ) | 0,060 |
| PC.aa.C40.5  | 2.08 ( 1.06 - 4.1 )  | 0,107 | 2.35 ( 1.23 - 4.49 ) | 0,096 | 2.1 ( 1.13 - 3.91 )  | 0,071 |
| PC.aa.C40.6  | 2.08 ( 1.03 - 4.21 ) | 0,120 | 1.72 ( 0.87 - 3.39 ) | 0,316 | 2.1 ( 1.1 - 4 )      | 0,075 |
| PC.aa.C42.0  | 1.68 ( 0.84 - 3.34 ) | 0,249 | 1.28 ( 0.66 - 2.51 ) | 0,687 | 1.92 ( 1.02 - 3.59 ) | 0,103 |
| PC.aa.C42.5  | 1.86 ( 0.94 - 3.7 )  | 0,169 | 1.45 ( 0.75 - 2.81 ) | 0,483 | 1.82 ( 0.97 - 3.41 ) | 0,127 |
| PC.aa.C43.6  | 1.45 ( 0.72 - 2.92 ) | 0,411 | 1.61 ( 0.82 - 3.15 ) | 0,407 | 1.92 ( 1.01 - 3.62 ) | 0,106 |
| PC.aa.C44.12 | 1.75 ( 0.87 - 3.52 ) | 0,216 | 1.54 ( 0.78 - 3.02 ) | 0,433 | 2.22 ( 1.17 - 4.22 ) | 0,064 |
| PC.ae.C30.0  | 1.97 ( 0.99 - 3.93 ) | 0,143 | 1.74 ( 0.9 - 3.38 )  | 0,298 | 1.38 ( 0.73 - 2.6 )  | 0,378 |
| PC.ae.C32.0  | 1.83 ( 0.91 - 3.67 ) | 0,187 | 1.67 ( 0.86 - 3.24 ) | 0,345 | 1.66 ( 0.88 - 3.14 ) | 0,189 |
| PC.ae.C32.1  | 1.97 ( 0.97 - 3.99 ) | 0,148 | 1.79 ( 0.91 - 3.51 ) | 0,284 | 1.78 ( 0.93 - 3.4 )  | 0,150 |
| PC.ae.C32.2  | 1.58 ( 0.79 - 3.16 ) | 0,304 | 1.16 ( 0.6 - 2.25 )  | 0,798 | 1.39 ( 0.73 - 2.63 ) | 0,376 |
| PC.ae.C34.0  | 1.97 ( 0.98 - 3.93 ) | 0,144 | 1.71 ( 0.88 - 3.33 ) | 0,311 | 1.25 ( 0.66 - 2.36 ) | 0,535 |
| PC.ae.C34.1  | 1.65 ( 0.82 - 3.32 ) | 0,267 | 1.51 ( 0.77 - 2.93 ) | 0,443 | 1.74 ( 0.92 - 3.29 ) | 0,152 |
| PC.ae.C34.2  | 1.42 ( 0.7 - 2.89 )  | 0,462 | 1.16 ( 0.58 - 2.31 ) | 0,799 | 1.64 ( 0.85 - 3.16 ) | 0,212 |
| PC.ae.C34.3  | 1.46 ( 0.73 - 2.89 ) | 0,400 | 1.14 ( 0.59 - 2.21 ) | 0,814 | 1.47 ( 0.78 - 2.77 ) | 0,300 |
| PC.ae.C34.4  | 1.52 ( 0.75 - 3.07 ) | 0,356 | 1.22 ( 0.62 - 2.4 )  | 0,754 | 1.74 ( 0.91 - 3.31 ) | 0,157 |
| PC.ae.C36.0  | 1.9 ( 0.95 - 3.82 )  | 0,165 | 1.94 ( 1 - 3.77 )    | 0,227 | 2.09 ( 1.1 - 3.96 )  | 0,075 |
| PC.ae.C36.1  | 2.23 ( 1.11 - 4.45 ) | 0,091 | 1.98 ( 1.02 - 3.86 ) | 0,217 | 2.41 ( 1.28 - 4.53 ) | 0,054 |
| PC.ae.C36.2  | 1.15 ( 0.56 - 2.35 ) | 0,773 | 1.05 ( 0.53 - 2.08 ) | 0,932 | 1.19 ( 0.61 - 2.29 ) | 0,639 |
| PC.ae.C36.3  | 1.67 ( 0.83 - 3.36 ) | 0,258 | 1.55 ( 0.79 - 3.04 ) | 0,431 | 2.25 ( 1.19 - 4.26 ) | 0,064 |
| PC.ae.C36.4  | 2.8 ( 1.42 - 5.52 )  | 0,036 | 2.63 ( 1.37 - 5.06 ) | 0,052 | 2.38 ( 1.28 - 4.44 ) | 0,054 |
| PC.ae.C36.5  | 2.5 ( 1.27 - 4.91 )  | 0,050 | 2.05 ( 1.07 - 3.94 ) | 0,184 | 2.16 ( 1.16 - 4.02 ) | 0,064 |
| PC.ae.C38.0  | 1.27 ( 0.62 - 2.61 ) | 0,602 | 1.51 ( 0.76 - 2.99 ) | 0,461 | 1.83 ( 0.95 - 3.53 ) | 0,134 |
| PC.ae.C38.2  | 1.41 ( 0.69 - 2.89 ) | 0,467 | 1.32 ( 0.66 - 2.62 ) | 0,656 | 1.25 ( 0.65 - 2.42 ) | 0,546 |
| PC.ae.C38.3  | 2.04 ( 1 - 4.14 )    | 0,133 | 2.48 ( 1.26 - 4.87 ) | 0,093 | 2.1 ( 1.1 - 4 )      | 0,075 |
| PC.ae.C38.4  | 2.06 ( 1.04 - 4.06 ) | 0,113 | 1.93 ( 1 - 3.7 )     | 0,223 | 1.91 ( 1.02 - 3.57 ) | 0,103 |
| PC.ae.C38.5  | 2.18 ( 1.1 - 4.32 )  | 0,093 | 2 ( 1.03 - 3.85 )    | 0,208 | 2.37 ( 1.27 - 4.43 ) | 0,054 |
| PC.ae.C38.6  | 2.23 ( 1.11 - 4.49 ) | 0,091 | 1.74 ( 0.89 - 3.42 ) | 0,307 | 2.45 ( 1.3 - 4.64 )  | 0,054 |
| PC.ae.C40.0  | 1.99 ( 0.96 - 4.14 ) | 0,154 | 1.91 ( 0.95 - 3.85 ) | 0,248 | 1.59 ( 0.81 - 3.11 ) | 0,247 |
| PC.ae.C40.1  | 1.81 ( 0.87 - 3.73 ) | 0,210 | 1.35 ( 0.67 - 2.72 ) | 0,636 | 1.58 ( 0.81 - 3.07 ) | 0,247 |
| PC.ae.C40.2  | 1.62 ( 0.8 - 3.28 )  | 0,291 | 1.16 ( 0.59 - 2.3 )  | 0,798 | 1.92 ( 1.01 - 3.65 ) | 0,109 |
| PC.ae.C40.3  | 2.23 ( 1.1 - 4.54 )  | 0,094 | 1.56 ( 0.78 - 3.09 ) | 0,433 | 1.49 ( 0.77 - 2.86 ) | 0,300 |
| PC.ae.C40.4  | 1.94 ( 0.97 - 3.87 ) | 0,150 | 1.44 ( 0.74 - 2.81 ) | 0,496 | 1.67 ( 0.88 - 3.17 ) | 0,189 |
| PC.ae.C40.5  | 1.76 ( 0.88 - 3.54 ) | 0,210 | 1.34 ( 0.68 - 2.61 ) | 0,632 | 2.23 ( 1.18 - 4.24 ) | 0,064 |
| PC.ae.C40.6  | 1.4 ( 0.69 - 2.85 )  | 0,467 | 1.25 ( 0.63 - 2.48 ) | 0,715 | 1.97 ( 1.03 - 3.77 ) | 0,103 |

|                  |                      |       |                      |       |                      |       |
|------------------|----------------------|-------|----------------------|-------|----------------------|-------|
| PC.ae.C42.1      | 2.79 ( 1.37 - 5.7 )  | 0,038 | 3.23 ( 1.63 - 6.4 )  | 0,047 | 1.58 ( 0.82 - 3.04 ) | 0,242 |
| PC.ae.C42.3      | 1.07 ( 0.52 - 2.19 ) | 0,908 | 0.68 ( 0.34 - 1.36 ) | 0,487 | 1.26 ( 0.65 - 2.46 ) | 0,535 |
| PC.ae.C42.4      | 1.59 ( 0.79 - 3.21 ) | 0,304 | 1.42 ( 0.73 - 2.78 ) | 0,515 | 1.85 ( 0.98 - 3.5 )  | 0,126 |
| PC.ae.C42.5      | 1.59 ( 0.79 - 3.19 ) | 0,304 | 1.19 ( 0.61 - 2.34 ) | 0,775 | 1.93 ( 1.02 - 3.67 ) | 0,106 |
| PC.ae.C42.6      | 1.21 ( 0.6 - 2.45 )  | 0,676 | 0.96 ( 0.49 - 1.9 )  | 0,939 | 1.6 ( 0.84 - 3.04 )  | 0,226 |
| SM.a.C30.1       | 1.89 ( 0.94 - 3.81 ) | 0,168 | 1.79 ( 0.92 - 3.48 ) | 0,276 | 1.59 ( 0.85 - 3 )    | 0,215 |
| SM.a.C32.1       | 1.79 ( 0.88 - 3.62 ) | 0,209 | 2.28 ( 1.17 - 4.43 ) | 0,126 | 1.64 ( 0.86 - 3.11 ) | 0,204 |
| SM.a.C32.2       | 2.2 ( 1.06 - 4.59 )  | 0,109 | 2.35 ( 1.18 - 4.65 ) | 0,126 | 2.47 ( 1.28 - 4.76 ) | 0,054 |
| SM.a.C33.1       | 1.42 ( 0.69 - 2.9 )  | 0,465 | 1.5 ( 0.76 - 2.96 )  | 0,456 | 1.37 ( 0.72 - 2.64 ) | 0,397 |
| SM.a.C34.1       | 2.02 ( 0.99 - 4.12 ) | 0,141 | 1.58 ( 0.8 - 3.12 )  | 0,414 | 1.57 ( 0.82 - 3.01 ) | 0,247 |
| SM.a.C34.2       | 2.72 ( 1.28 - 5.76 ) | 0,054 | 1.96 ( 0.96 - 3.98 ) | 0,241 | 2.04 ( 1.03 - 4 )    | 0,103 |
| SM.a.C35.0       | 1.67 ( 0.83 - 3.35 ) | 0,262 | 1.31 ( 0.67 - 2.55 ) | 0,656 | 1.8 ( 0.95 - 3.4 )   | 0,136 |
| SM.a.C35.1       | 1.16 ( 0.56 - 2.39 ) | 0,766 | 1.45 ( 0.73 - 2.87 ) | 0,502 | 1.44 ( 0.75 - 2.78 ) | 0,337 |
| SM.a.C36.1       | 1.85 ( 0.89 - 3.82 ) | 0,196 | 1.9 ( 0.96 - 3.79 )  | 0,241 | 2.35 ( 1.22 - 4.53 ) | 0,064 |
| SM.a.C36.2       | 1.78 ( 0.84 - 3.79 ) | 0,237 | 1.95 ( 0.96 - 3.98 ) | 0,241 | 2.24 ( 1.13 - 4.42 ) | 0,071 |
| SM.a.C36.3       | 1.71 ( 0.81 - 3.64 ) | 0,272 | 1.57 ( 0.77 - 3.18 ) | 0,433 | 2.04 ( 1.04 - 4.01 ) | 0,103 |
| SM.a.C37.1       | 1.32 ( 0.64 - 2.69 ) | 0,555 | 1.55 ( 0.79 - 3.04 ) | 0,433 | 2.4 ( 1.27 - 4.55 )  | 0,054 |
| SM.a.C38.2       | 1.37 ( 0.67 - 2.8 )  | 0,497 | 1.6 ( 0.82 - 3.14 )  | 0,407 | 2.19 ( 1.15 - 4.18 ) | 0,067 |
| SM.a.C38.3       | 1.33 ( 0.66 - 2.69 ) | 0,536 | 1.59 ( 0.82 - 3.08 ) | 0,407 | 1.83 ( 0.97 - 3.46 ) | 0,129 |
| SM.a.C39.1       | 1.97 ( 0.95 - 4.1 )  | 0,163 | 1.78 ( 0.89 - 3.56 ) | 0,303 | 1.94 ( 1 - 3.76 )    | 0,109 |
| SM.a.C39.2       | 1.11 ( 0.53 - 2.32 ) | 0,835 | 1.1 ( 0.55 - 2.2 )   | 0,872 | 1.67 ( 0.86 - 3.23 ) | 0,204 |
| SM.a.C40.2       | 2 ( 0.99 - 4.07 )    | 0,143 | 2.11 ( 1.08 - 4.13 ) | 0,184 | 2.27 ( 1.2 - 4.32 )  | 0,064 |
| SM.a.C40.5       | 2.03 ( 1.02 - 4.05 ) | 0,124 | 1.91 ( 0.98 - 3.7 )  | 0,241 | 3.38 ( 1.81 - 6.32 ) | 0,009 |
| SM.a.C41.1       | 1.95 ( 0.97 - 3.92 ) | 0,148 | 1.89 ( 0.98 - 3.66 ) | 0,241 | 2.14 ( 1.15 - 4 )    | 0,067 |
| SM.a.C41.2       | 1.57 ( 0.77 - 3.18 ) | 0,318 | 1.48 ( 0.76 - 2.9 )  | 0,465 | 2.12 ( 1.12 - 4 )    | 0,071 |
| SM.a.C42.1       | 2.03 ( 1.02 - 4.04 ) | 0,123 | 1.26 ( 0.65 - 2.43 ) | 0,705 | 1.7 ( 0.91 - 3.18 )  | 0,163 |
| SM.a.C42.2       | 2.16 ( 1.06 - 4.43 ) | 0,109 | 1.24 ( 0.63 - 2.47 ) | 0,729 | 2.14 ( 1.11 - 4.1 )  | 0,073 |
| SM.a.C42.3       | 2.11 ( 1.03 - 4.32 ) | 0,117 | 1.57 ( 0.79 - 3.11 ) | 0,423 | 2.15 ( 1.12 - 4.14 ) | 0,071 |
| SM.a.C42.4       | 2.67 ( 1.34 - 5.31 ) | 0,038 | 2.78 ( 1.44 - 5.37 ) | 0,049 | 2.73 ( 1.45 - 5.13 ) | 0,032 |
| SM.a.C42.6       | 1.99 ( 0.97 - 4.07 ) | 0,148 | 2.02 ( 1.02 - 4 )    | 0,217 | 2.24 ( 1.17 - 4.32 ) | 0,066 |
| SM.a.C43.1       | 2.34 ( 1.15 - 4.75 ) | 0,085 | 1.18 ( 0.6 - 2.34 )  | 0,776 | 1.56 ( 0.82 - 2.99 ) | 0,247 |
| SM.a.C43.2       | 2.17 ( 1.07 - 4.37 ) | 0,103 | 1.84 ( 0.94 - 3.62 ) | 0,254 | 1.46 ( 0.77 - 2.77 ) | 0,311 |
| SM.a.C44.6       | 1.84 ( 0.9 - 3.73 )  | 0,193 | 1.4 ( 0.71 - 2.75 )  | 0,556 | 2.3 ( 1.21 - 4.38 )  | 0,064 |
| SM.e.C36.2       | 1.63 ( 0.78 - 3.42 ) | 0,304 | 1.27 ( 0.63 - 2.56 ) | 0,709 | 1.54 ( 0.78 - 3.02 ) | 0,283 |
| SM.e.C38.3       | 1.26 ( 0.63 - 2.52 ) | 0,608 | 1.32 ( 0.68 - 2.57 ) | 0,636 | 2.12 ( 1.13 - 4 )    | 0,071 |
| SM.e.C40.5       | 1.7 ( 0.86 - 3.36 )  | 0,221 | 1.56 ( 0.81 - 3.01 ) | 0,414 | 2.14 ( 1.15 - 3.97 ) | 0,067 |
| Carn             | 1.5 ( 0.74 - 3.04 )  | 0,377 | 1.28 ( 0.65 - 2.49 ) | 0,691 | 2.26 ( 1.2 - 4.26 )  | 0,064 |
| Carn.a.C10.0     | 2.22 ( 1.12 - 4.42 ) | 0,091 | 1.24 ( 0.63 - 2.41 ) | 0,729 | 1.65 ( 0.87 - 3.1 )  | 0,199 |
| Carn.a.C10.1     | 1.64 ( 0.82 - 3.31 ) | 0,276 | 1.03 ( 0.53 - 2.03 ) | 0,939 | 1.91 ( 1.01 - 3.62 ) | 0,109 |
| Carn.a.C12.0     | 1.72 ( 0.86 - 3.41 ) | 0,221 | 1.17 ( 0.61 - 2.28 ) | 0,778 | 1.93 ( 1.03 - 3.63 ) | 0,103 |
| Carn.a.C14.1     | 1.39 ( 0.7 - 2.76 )  | 0,467 | 0.84 ( 0.43 - 1.63 ) | 0,775 | 1.88 ( 1 - 3.52 )    | 0,109 |
| Carn.a.C14.2     | 1.09 ( 0.55 - 2.16 ) | 0,850 | 0.91 ( 0.47 - 1.75 ) | 0,872 | 1.79 ( 0.96 - 3.34 ) | 0,131 |
| Carn.a.C15.0     | 1.19 ( 0.6 - 2.37 )  | 0,694 | 1.03 ( 0.54 - 1.99 ) | 0,939 | 1.5 ( 0.8 - 2.81 )   | 0,278 |
| Carn.a.C16.0     | 1.36 ( 0.69 - 2.68 ) | 0,488 | 1.51 ( 0.79 - 2.92 ) | 0,433 | 1.44 ( 0.77 - 2.69 ) | 0,318 |
| Carn.a.C16.0.Oxo | 1.16 ( 0.58 - 2.33 ) | 0,758 | 1 ( 0.51 - 1.97 )    | 0,998 | 1.55 ( 0.82 - 2.96 ) | 0,247 |



|                                           |                      |       |                      |       |                      |       |
|-------------------------------------------|----------------------|-------|----------------------|-------|----------------------|-------|
| Carn.a.C16.1                              | 1.03 ( 0.52 - 2.06 ) | 0,956 | 1.01 ( 0.52 - 1.96 ) | 0,979 | 1.89 ( 1 - 3.56 )    | 0,109 |
| Carn.a.C16.2                              | 0.76 ( 0.39 - 1.5 )  | 0,540 | 0.84 ( 0.44 - 1.61 ) | 0,775 | 1.59 ( 0.86 - 2.96 ) | 0,212 |
| Carn.a.C18.0                              | 0.89 ( 0.45 - 1.76 ) | 0,804 | 0.66 ( 0.35 - 1.28 ) | 0,438 | 1.05 ( 0.56 - 1.96 ) | 0,889 |
| Carn.a.C18.1                              | 1.39 ( 0.69 - 2.77 ) | 0,468 | 1.07 ( 0.55 - 2.09 ) | 0,904 | 2.09 ( 1.11 - 3.94 ) | 0,072 |
| Carn.a.C18.2                              | 1.27 ( 0.65 - 2.51 ) | 0,585 | 1.09 ( 0.57 - 2.11 ) | 0,872 | 1.73 ( 0.93 - 3.22 ) | 0,151 |
| Carn.a.C18.2.OH                           | 1.07 ( 0.55 - 2.11 ) | 0,883 | 0.92 ( 0.48 - 1.75 ) | 0,872 | 1.19 ( 0.64 - 2.22 ) | 0,619 |
| Carn.a.C2.0                               | 2.36 ( 1.18 - 4.69 ) | 0,074 | 1.58 ( 0.82 - 3.07 ) | 0,407 | 3.16 ( 1.68 - 5.94 ) | 0,009 |
| Carn.a.C20.0                              | 1.56 ( 0.78 - 3.11 ) | 0,311 | 1.84 ( 0.96 - 3.55 ) | 0,241 | 1.31 ( 0.7 - 2.46 )  | 0,459 |
| Carn.a.C20.1                              | 1.29 ( 0.65 - 2.53 ) | 0,566 | 0.98 ( 0.51 - 1.87 ) | 0,971 | 1.59 ( 0.86 - 2.95 ) | 0,212 |
| Carn.a.C20.3                              | 1.13 ( 0.58 - 2.22 ) | 0,790 | 1.14 ( 0.6 - 2.16 )  | 0,819 | 1.22 ( 0.66 - 2.26 ) | 0,569 |
| Carn.a.C20.4                              | 1.4 ( 0.71 - 2.76 )  | 0,457 | 1.18 ( 0.62 - 2.27 ) | 0,776 | 1.46 ( 0.78 - 2.72 ) | 0,301 |
| Carn.a.C3.0                               | 1.79 ( 0.9 - 3.53 )  | 0,195 | 1.31 ( 0.68 - 2.52 ) | 0,640 | 1.79 ( 0.96 - 3.33 ) | 0,131 |
| Carn.a.C3.0.DC                            | 1.03 ( 0.51 - 2.05 ) | 0,958 | 0.89 ( 0.45 - 1.73 ) | 0,843 | 1.27 ( 0.67 - 2.4 )  | 0,516 |
| Carn.a.C4.0                               | 1.84 ( 0.94 - 3.63 ) | 0,169 | 1.37 ( 0.71 - 2.64 ) | 0,557 | 1.75 ( 0.94 - 3.25 ) | 0,142 |
| Carn.a.C5.0                               | 1.92 ( 0.97 - 3.79 ) | 0,148 | 1.64 ( 0.85 - 3.15 ) | 0,362 | 1.85 ( 0.99 - 3.45 ) | 0,116 |
| Carn.a.C6.0                               | 2.27 ( 1.14 - 4.53 ) | 0,087 | 1.26 ( 0.65 - 2.47 ) | 0,705 | 1.54 ( 0.82 - 2.92 ) | 0,247 |
| Carn.a.C6.0.OH                            | 1.39 ( 0.69 - 2.8 )  | 0,468 | 1.16 ( 0.59 - 2.27 ) | 0,798 | 1.75 ( 0.93 - 3.32 ) | 0,152 |
| Carn.a.C8.0                               | 1.8 ( 0.9 - 3.6 )    | 0,195 | 1.21 ( 0.62 - 2.35 ) | 0,775 | 1.31 ( 0.69 - 2.48 ) | 0,459 |
| Carn.a.C8.1                               | 1.64 ( 0.81 - 3.33 ) | 0,284 | 1.63 ( 0.83 - 3.22 ) | 0,402 | 1.96 ( 1.03 - 3.74 ) | 0,103 |
| Carn.a.C9.0                               | 2.19 ( 1.11 - 4.35 ) | 0,091 | 1.1 ( 0.57 - 2.14 )  | 0,872 | 1.42 ( 0.76 - 2.67 ) | 0,337 |
| Asn/Asp                                   | 0.37 ( 0.19 - 0.72 ) | 0,038 | 0.58 ( 0.3 - 1.1 )   | 0,284 | 0.54 ( 0.29 - 0.99 ) | 0,109 |
| Gln/Glu                                   | 0.58 ( 0.29 - 1.15 ) | 0,216 | 0.51 ( 0.26 - 0.98 ) | 0,217 | 0.31 ( 0.17 - 0.58 ) | 0,009 |
| NEFA18.1/NEFA18.0                         | 0.99 ( 0.49 - 1.99 ) | 0,978 | 0.85 ( 0.43 - 1.65 ) | 0,776 | 1.55 ( 0.82 - 2.93 ) | 0,247 |
| NEFA16.1/NEFA16.0                         | 1.06 ( 0.52 - 2.17 ) | 0,914 | 1.27 ( 0.64 - 2.52 ) | 0,705 | 1.21 ( 0.63 - 2.32 ) | 0,598 |
| PC.aa/PC.ae                               | 1.24 ( 0.62 - 2.5 )  | 0,627 | 1.48 ( 0.76 - 2.9 )  | 0,467 | 1.4 ( 0.74 - 2.65 )  | 0,365 |
| Lyso.PC.a/PC.aa                           | 0.68 ( 0.33 - 1.38 ) | 0,408 | 1.09 ( 0.56 - 2.12 ) | 0,875 | 1.23 ( 0.65 - 2.32 ) | 0,559 |
| (lyso.PC.a.C16.0 + lyso.PC.a.C18.0)/PC.aa | 0.61 ( 0.3 - 1.26 )  | 0,292 | 1.3 ( 0.66 - 2.55 )  | 0,663 | 1.42 ( 0.75 - 2.71 ) | 0,346 |
| (lyso.PC.a.C18.1 + lyso.PC.a.C18.2)       | 0.76 ( 0.38 - 1.53 ) | 0,548 | 0.65 ( 0.34 - 1.25 ) | 0,423 | 0.8 ( 0.43 - 1.49 )  | 0,521 |
| Carn.a.C.16.0/free Carn                   | 1.09 ( 0.55 - 2.18 ) | 0,850 | 1.31 ( 0.68 - 2.53 ) | 0,640 | 0.88 ( 0.47 - 1.64 ) | 0,704 |
| Carn.a.C2.0/Carn.a.C16.0                  | 1.37 ( 0.69 - 2.73 ) | 0,478 | 0.9 ( 0.46 - 1.74 )  | 0,858 | 1.5 ( 0.8 - 2.8 )    | 0,278 |

Values represent absolute differences in blood pressure (95% confidence interval) and corresponding p-values from linear regression models that reflect the difference in blood pressure (mmHg) per SDS increase in maternal early-pregnancy metabolite concentrations ( $\mu\text{mol/L}$ ) or metabolite ratio. Model includes gestational age at time of measurement, age, parity, pre-pregnancy body mass index, educational level, smoking and folic acid supplementation. AA amino acids, NEFA non-esterified fatty acids, PC.aa diacyl-phosphatidylcholines, PC.ae acyl-alkyl-phosphatidylcholines, lyso.PC.a acyl-lysophosphatidylcholines, lyso.PC.e alkyl-lysophosphatidylcholines, Carn.a acyl-carnitines, SM sphingomyelins.

<sup>a</sup> p-value corrected for multiple hypothesis testing using Benjamin-Hochberg FDR correction.

\*Statistically significant

**Table S10.** Lasso regression on systolic blood pressure change from first to third trimester

| Variable                                                                                                                                                                                                                                                  | Coefficient |
|-----------------------------------------------------------------------------------------------------------------------------------------------------------------------------------------------------------------------------------------------------------|-------------|
| AGE_M_v2                                                                                                                                                                                                                                                  | 0.20        |
| BMI_0                                                                                                                                                                                                                                                     | -0.62       |
| PARITY                                                                                                                                                                                                                                                    | -0.10       |
| Smoke2cat                                                                                                                                                                                                                                                 | -0.94       |
| Asp                                                                                                                                                                                                                                                       | 1.59        |
| His                                                                                                                                                                                                                                                       | 0.19        |
| Phe                                                                                                                                                                                                                                                       | -1.14       |
| Trp                                                                                                                                                                                                                                                       | -0.45       |
| Cys                                                                                                                                                                                                                                                       | 0.37        |
| NEFA_14_1                                                                                                                                                                                                                                                 | 0.16        |
| NEFA_16_0                                                                                                                                                                                                                                                 | -0.49       |
| NEFA_16_1                                                                                                                                                                                                                                                 | 0.48        |
| NEFA_17_1                                                                                                                                                                                                                                                 | -0.67       |
| NEFA_22_3                                                                                                                                                                                                                                                 | 0.98        |
| NEFA_22_5                                                                                                                                                                                                                                                 | -0.11       |
| NEFA_22_6                                                                                                                                                                                                                                                 | -0.23       |
| NEFA_24_4                                                                                                                                                                                                                                                 | -0.18       |
| NEFA_26_1                                                                                                                                                                                                                                                 | 0.14        |
| Lyso.PC.a.C16.0                                                                                                                                                                                                                                           | 0.22        |
| Lyso.PC.a.C16.1                                                                                                                                                                                                                                           | 0.67        |
| Lyso.PC.a.C18.1                                                                                                                                                                                                                                           | -0.90       |
| Lyso.PC.a.C18.2                                                                                                                                                                                                                                           | -0.12       |
| Lyso.PC.a.C20.3                                                                                                                                                                                                                                           | 0.10        |
| PC.aa.C30.0                                                                                                                                                                                                                                               | -0.06       |
| PC.aa.C32.0                                                                                                                                                                                                                                               | -0.97       |
| PC.aa.C34.4                                                                                                                                                                                                                                               | -1.63       |
| PC.aa.C34.5                                                                                                                                                                                                                                               | -0.14       |
| PC.aa.C36.5                                                                                                                                                                                                                                               | -1.36       |
| PC.aa.C38.3                                                                                                                                                                                                                                               | 0.03        |
| PC.aa.C38.5                                                                                                                                                                                                                                               | 1.82        |
| PC.aa.C40.2                                                                                                                                                                                                                                               | -0.32       |
| PC.ae.C36.4                                                                                                                                                                                                                                               | 0.39        |
| SM.a.C40.5                                                                                                                                                                                                                                                | 1.59        |
| Asn/asp                                                                                                                                                                                                                                                   | 0.64        |
| Gln/glu                                                                                                                                                                                                                                                   | -0.27       |
| Lasso regression on the outcome systolic blood pressure change from first to third trimester, including all early-pregnancy metabolites and the selected confounders age, pre-pregnancy body-mass index, parity and smoking, that could not be penalized. |             |

**Table S11.** Lasso on diastolic blood pressure change from first to third trimester

| Variable                                                                                                                                                                                                                                                  | Coefficient |
|-----------------------------------------------------------------------------------------------------------------------------------------------------------------------------------------------------------------------------------------------------------|-------------|
| AGE_M_v2                                                                                                                                                                                                                                                  | 0.21        |
| BMI_0                                                                                                                                                                                                                                                     | -0.62       |
| PARITY                                                                                                                                                                                                                                                    | -0.68       |
| Smoke2cat                                                                                                                                                                                                                                                 | -0.92       |
| Arg                                                                                                                                                                                                                                                       | 0.00        |
| Asn                                                                                                                                                                                                                                                       | 0.03        |
| Gly                                                                                                                                                                                                                                                       | -0.01       |
| Lys                                                                                                                                                                                                                                                       | 0.04        |
| Phe                                                                                                                                                                                                                                                       | -0.07       |
| Trp                                                                                                                                                                                                                                                       | -0.04       |
| NEFA_15_0                                                                                                                                                                                                                                                 | -0.45       |
| NEFA_17_2                                                                                                                                                                                                                                                 | -8.18       |
| NEFA_18_0                                                                                                                                                                                                                                                 | 0.00        |
| NEFA_18_2                                                                                                                                                                                                                                                 | -0.01       |
| NEFA_26_0                                                                                                                                                                                                                                                 | -0.17       |
| lyso.PC.a.C18.1                                                                                                                                                                                                                                           | -0.18       |
| lyso.PC.a.C18.2                                                                                                                                                                                                                                           | 0.00        |
| lyso.PC.e.C18.0                                                                                                                                                                                                                                           | 1.36        |
| PC.aa.C34.4                                                                                                                                                                                                                                               | -0.54       |
| PC.aa.C40.0                                                                                                                                                                                                                                               | -0.22       |
| PC.aa.C40.2                                                                                                                                                                                                                                               | -2.94       |
| PC.aa.C40.5                                                                                                                                                                                                                                               | 0.14        |
| PC.ae.C30.0                                                                                                                                                                                                                                               | -0.45       |
| PC.ae.C32.2                                                                                                                                                                                                                                               | -3.50       |
| PC.ae.C36.1                                                                                                                                                                                                                                               | 0.07        |
| PC.ae.C36.5                                                                                                                                                                                                                                               | -0.07       |
| PC.ae.C40.5                                                                                                                                                                                                                                               | 0.13        |
| SM.a.C32.2                                                                                                                                                                                                                                                | 0.83        |
| SM.a.C35.0                                                                                                                                                                                                                                                | 3.40        |
| SM.a.C35.1                                                                                                                                                                                                                                                | 0.19        |
| SM.a.C37.1                                                                                                                                                                                                                                                | 0.02        |
| SM.a.C39.2                                                                                                                                                                                                                                                | 0.99        |
| SM.a.C40.5                                                                                                                                                                                                                                                | 0.47        |
| SM.a.C41.1                                                                                                                                                                                                                                                | -0.07       |
| SM.a.C42.3                                                                                                                                                                                                                                                | 0.06        |
| SM.a.C43.2                                                                                                                                                                                                                                                | -0.43       |
| SM.a.C44.6                                                                                                                                                                                                                                                | 0.03        |
| SM.e.C40.5                                                                                                                                                                                                                                                | -1.06       |
| Carn                                                                                                                                                                                                                                                      | 0.13        |
| Carn.a.C10.0                                                                                                                                                                                                                                              | 8.46        |
| Carn.a.C15.0                                                                                                                                                                                                                                              | 6.27        |
| Carn.a.C16.1                                                                                                                                                                                                                                              | 36.69       |
| Carn.a.C16.2                                                                                                                                                                                                                                              | 20.98       |
| Carn.a.C20.0                                                                                                                                                                                                                                              | -109.26     |
| Carn.a.C20.3                                                                                                                                                                                                                                              | -4.75       |
| Carn.a.C4.0                                                                                                                                                                                                                                               | -2.38       |
| Carn.a.C6.0.OH                                                                                                                                                                                                                                            | 33.44       |
| Asn/asp                                                                                                                                                                                                                                                   | 0.18        |
| Gln/glu                                                                                                                                                                                                                                                   | -0.40       |
| Lasso regression on the outcome systolic blood pressure change from first to third trimester, including all early-pregnancy metabolites and the selected confounders age, pre-pregnancy body-mass index, parity and smoking, that could not be penalized. |             |

**Figure S1.** Flowchart of participants included in the study.

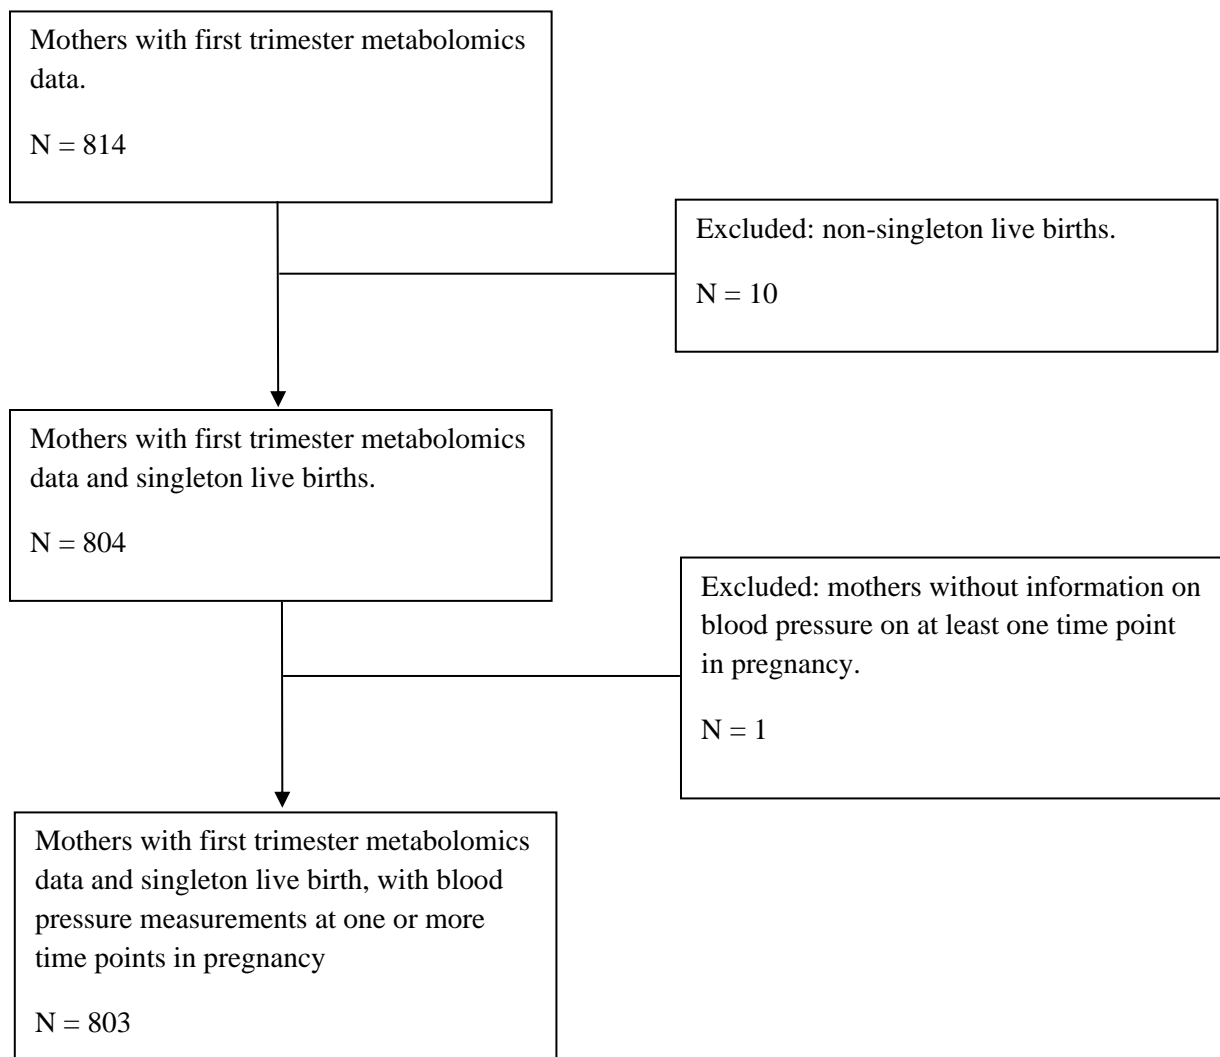

**Figure S2.** Direct Acyclic Graph

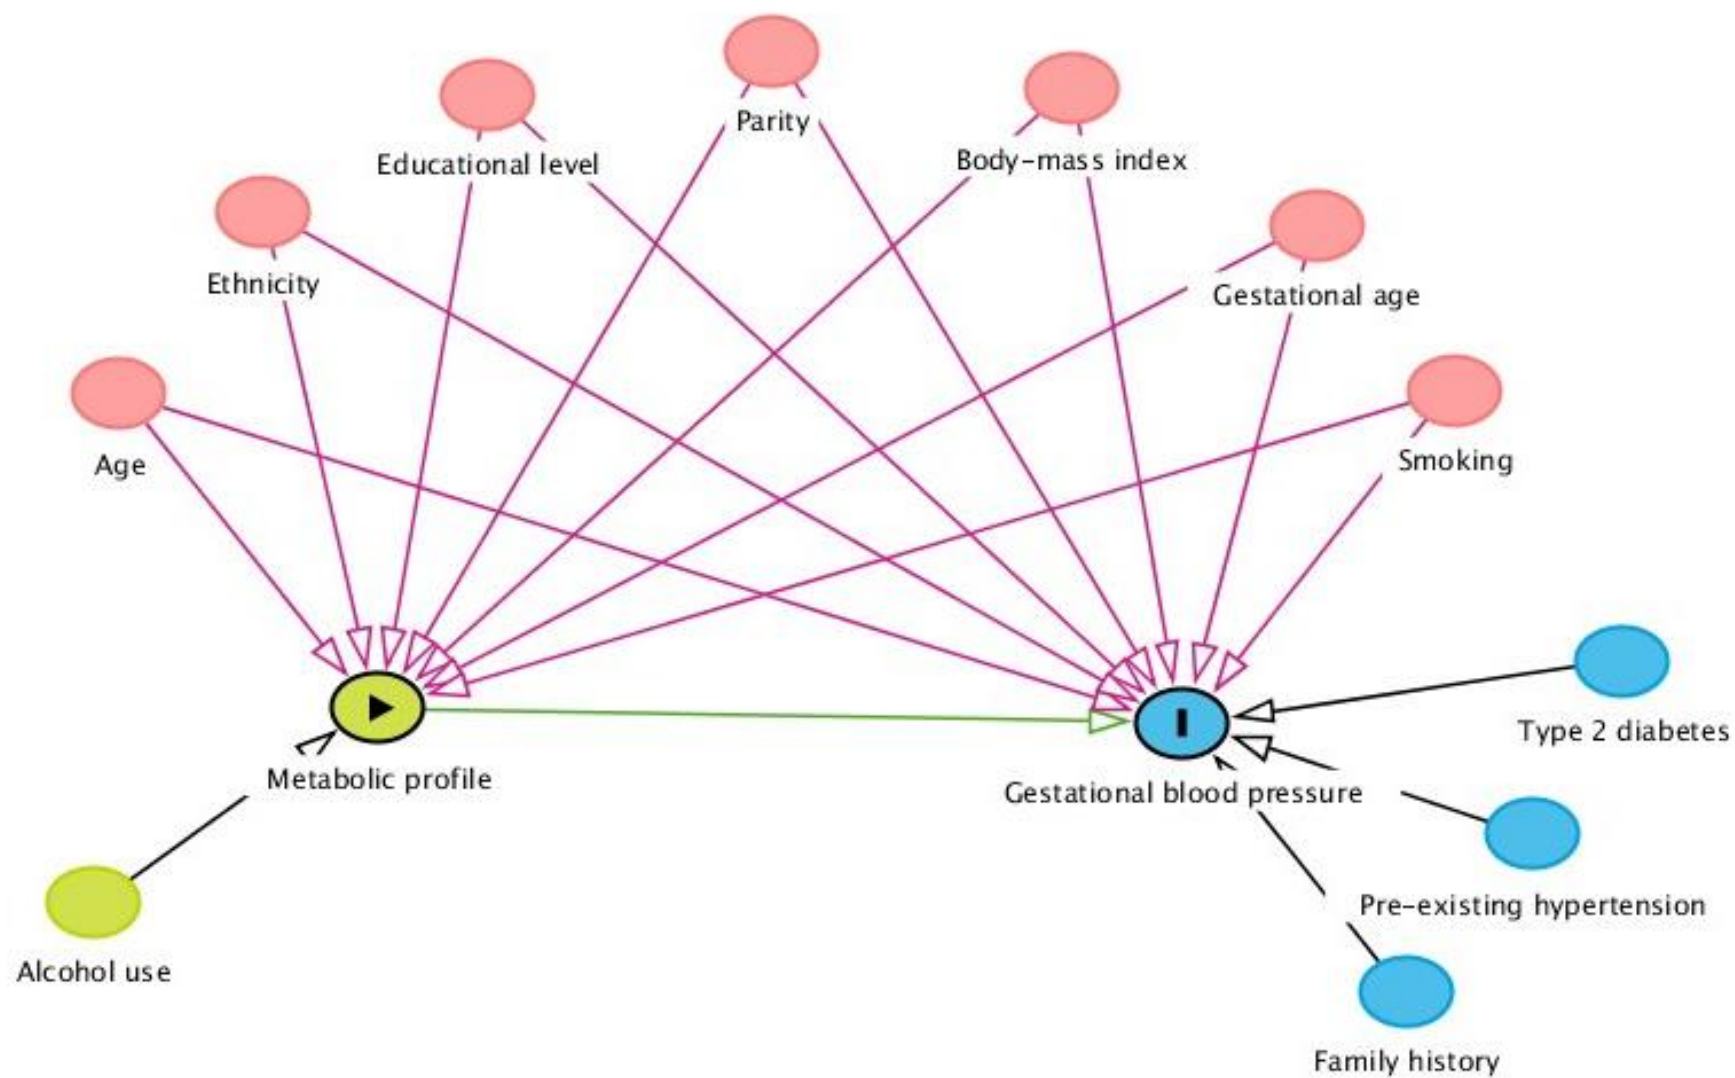

**Figure S3.** ROC curves on the prediction of gestational hypertensive disorders

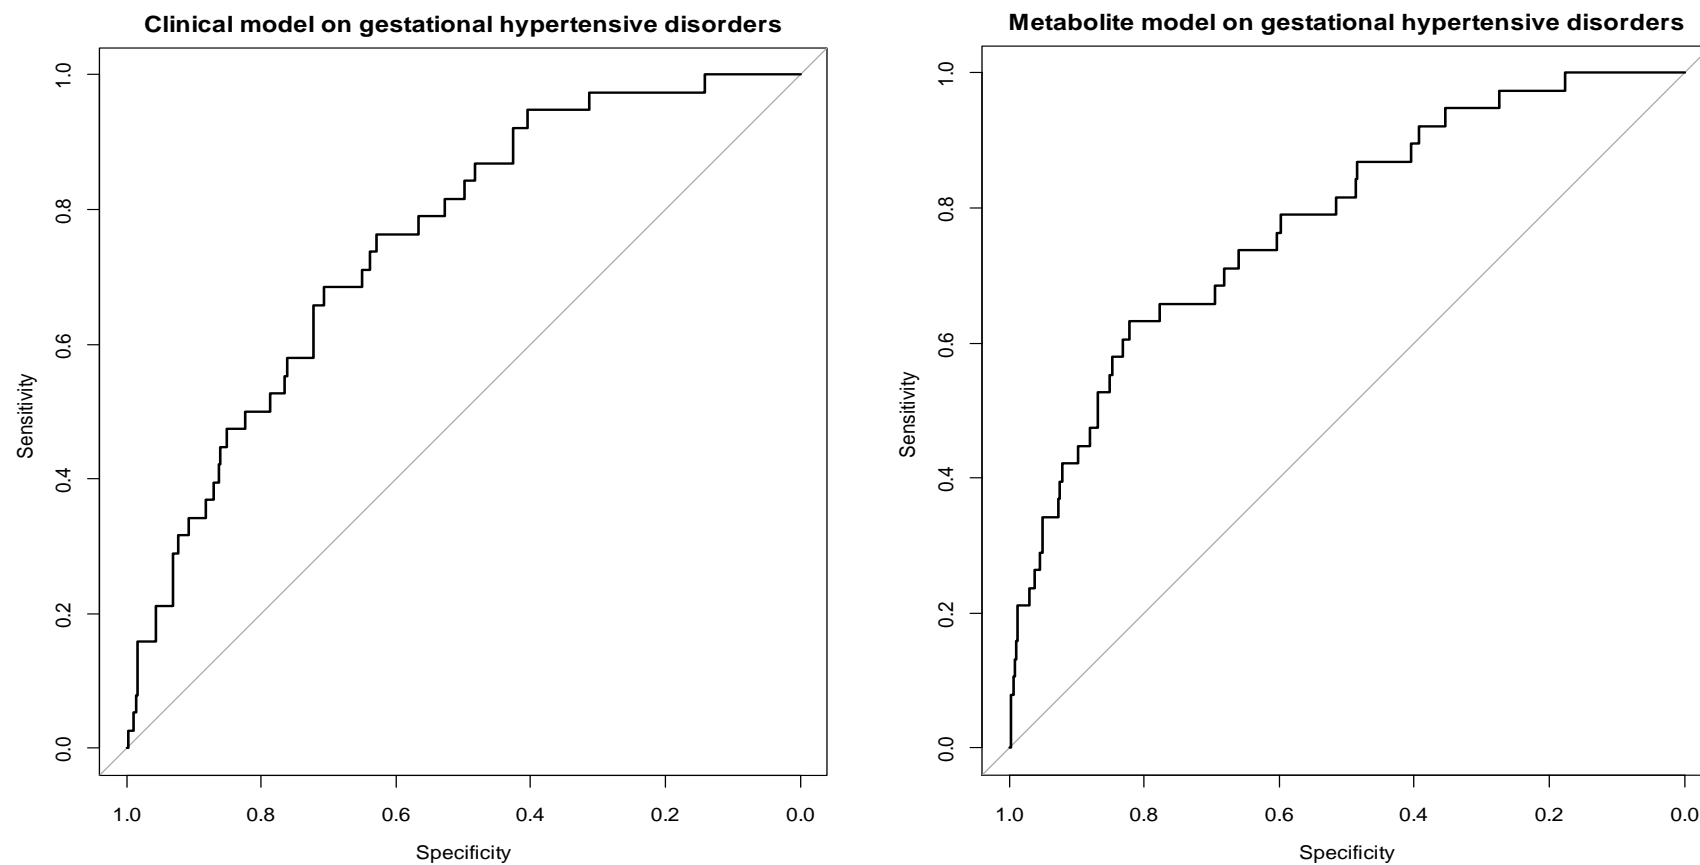

Clinical models includes maternal age, pre-pregnancy BMI, parity and smoking. Metabolite model includes maternal age, pre-pregnancy BMI, parity, smoking, and arginine, asparagine, glycine, lysine, tryptophan, NEFA\_18\_0, NEFA\_26\_0, PC.aa.C34.4, PC.ae.C36.5, SM.a.C37.1, SM.a.C38.2, SM.a.C39.2, SM.a.C41.1, SM.a.C43.2, Carn.a.C16.1, Carn.a.C16.2 and Arginine/asparagine ratio.
